# Supplementary material for: Dating circulations of hydrothermal fluids in the crystalline basements of unconformity-related metallic deposits using in situ Rb/Sr geochronology: proof of concept
Source: Copernicus journal article supplement (doi:10.5194/egusphere-2025-6469), 2026-01-20
Supplement: Supplementary file 1 [file Supplement Table S1_Rb-Sr data.xlsx]

## Sheet: Samples
Session	LA	Spot	Sample	Deposit	Assemblage	Alteration	87Rb/86Sr	2σ	87Sr/86Sr	2σ	rho	Single spot Rb-Sr date (Ma)	Error (Ma)	102Sr (ppm)	103Sr (ppm)	85Rb (ppm)	87Rb (ppm)	86Sr (ppm)	87Sr (ppm)
Session 1	193 nm	MCS-34_266,2_1	MCS-34_266,2	McClean South	Eearly hydrothermal muscovites	Altered	200.624	14.343	5.19008	0.274496	0.59824	1601.6	41.5	4.15333	30.4847	159.062	61.3371	0.305731	1.58677
Session 1	193 nm	MCS-34_266,2_2	MCS-34_266,2	McClean South	Eearly hydrothermal muscovites	Altered	173.595	8.61234	4.43647	0.228906	0.847976	1552.5	21	4.71652	29.4778	156.127	60.2054	0.346815	1.53863
Session 1	193 nm	MCS-34_266,2_3	MCS-34_266,2	McClean South	Eearly hydrothermal muscovites	Altered	164.297	9.0964	4.32764	0.252194	0.865546	1587	23.1	4.96629	30.2775	155.59	59.9982	0.365181	1.58037
Session 1	193 nm	MCS-34_266,2_4	MCS-34_266,2	McClean South	Eearly hydrothermal muscovites	Altered	151.847	6.76689	4.05039	0.150018	0.788353	1587.7	19	6.93171	39.5525	200.708	77.3967	0.509702	2.06449
Session 1	193 nm	MCS-34_266,2_5	MCS-34_266,2	McClean South	Eearly hydrothermal muscovites	Altered	509.63	37.286	12.1684	0.78443	0.898266	1599.7	24.1	3.89481	65.936	374.467	144.401	0.283344	3.44786
Session 1	193 nm	MCS-34_266,2_6	MCS-34_266,2	McClean South	Eearly hydrothermal muscovites	Altered	302.835	15.3944	7.50289	0.361753	0.885917	1601.6	18	4.78645	50.5917	276.401	106.585	0.351958	2.6407
Session 1	193 nm	MCS-34_266,2_7	MCS-34_266,2	McClean South	Eearly hydrothermal muscovites	Altered	136.602	6.53515	3.85588	0.147222	0.750928	1650.1	22.4	7.53189	40.9133	196.192	75.6549	0.553835	2.13552
Session 1	193 nm	MCS-34_266,2_8	MCS-34_266,2	McClean South	Eearly hydrothermal muscovites	Altered	118.818	5.12177	3.49756	0.135064	0.738443	1676.9	22.2	7.14436	35.2018	161.869	62.4197	0.525339	1.83741
Session 1	193 nm	MCS-34_266,2_9	MCS-34_266,2	McClean South	Eearly hydrothermal muscovites	Altered	119.433	5.91898	3.45279	0.134188	0.775609	1648.9	21.5	6.76099	32.8864	153.976	59.376	0.497149	1.71655
Session 1	193 nm	MCS-34_266,2_10	MCS-34_266,2	McClean South	Eearly hydrothermal muscovites	Altered	271.557	25.8875	6.8262	0.590576	0.958605	1608.8	19.8	5.83047	56.0685	301.915	116.424	0.428726	2.92657
Session 1	193 nm	MCS-34_266,2_11	MCS-34_266,2	McClean South	Eearly hydrothermal muscovites	Altered	118.016	5.00394	3.56154	0.148403	0.757454	1716.4	23.2	6.28807	31.5495	141.507	54.5676	0.462375	1.64677
Session 1	193 nm	MCS-34_266,2_12	MCS-34_266,2	McClean South	Eearly hydrothermal muscovites	Altered	125.741	5.95256	3.68728	0.159423	0.873403	1688.5	17.6	6.53875	33.9655	156.78	60.457	0.480808	1.77287
Session 1	193 nm	MCS-34_266,2_13	MCS-34_266,2	McClean South	Eearly hydrothermal muscovites	Altered	189.573	14.2015	5.07108	0.34487	0.928847	1643.6	20.5	6.99817	49.9944	252.976	97.552	0.514589	2.60952
Session 1	193 nm	MCS-34_266,2_14	MCS-34_266,2	McClean South	Eearly hydrothermal muscovites	Altered	160.973	6.5356	4.46549	0.15195	0.730361	1665.3	20.7	7.88758	49.6192	242.112	93.3624	0.579989	2.58994
Session 1	193 nm	MCS-34_266,2_15	MCS-34_266,2	McClean South	Eearly hydrothermal muscovites	Preserved	126.399	6.44203	3.80814	0.163231	0.882114	1735.8	17.6	6.51334	34.9424	156.989	60.5375	0.478939	1.82387
Session 1	193 nm	MCS-34_266,2_16	MCS-34_266,2	McClean South	Eearly hydrothermal muscovites	Altered	176.606	9.94706	4.81197	0.219537	0.918711	1658	15.7	6.98651	47.3609	235.281	90.7284	0.513732	2.47207
Session 1	193 nm	MCS-34_266,2_17	MCS-34_266,2	McClean South	Eearly hydrothermal muscovites	Altered	224.514	10.1062	6.05551	0.241198	0.786486	1691.3	21.8	6.02525	51.3999	257.951	99.4705	0.443049	2.68289
Session 1	193 nm	MCS-34_266,2_18	MCS-34_266,2	McClean South	Eearly hydrothermal muscovites	Altered	117.181	6.01993	3.55174	0.15966	0.794616	1721.4	23.7	6.94011	34.7252	155.076	59.8001	0.51032	1.81252
Session 1	193 nm	MCS-34_266,2_19	MCS-34_266,2	McClean South	Eearly hydrothermal muscovites	Altered	209.128	12.5528	5.63093	0.257294	0.841455	1674.7	23.6	7.52232	59.6717	299.974	115.675	0.553131	3.11464
Session 1	193 nm	MCS-34_266,2_20	MCS-34_266,2	McClean South	Eearly hydrothermal muscovites	Altered	175.599	8.47223	4.87802	0.196441	0.719162	1688.7	25.6	7.43312	50.3278	248.893	95.9773	0.546572	2.66619
Session 1	193 nm	MCS-34_266,2_21	MCS-34_266,2	McClean South	Eearly hydrothermal muscovites	Altered	207.8	10.1927	5.74722	0.252469	0.694965	1718.3	28.9	7.3038	59.1348	289.411	111.602	0.537063	3.08662
Session 1	193 nm	MCS-34_266,2_22	MCS-34_266,2	McClean South	Eearly hydrothermal muscovites	Altered	236.19	9.71248	6.31498	0.255375	0.77298	1686.1	21.8	6.78513	60.3624	305.59	117.841	0.498924	3.15069
Session 1	193 nm	MCS-34_266,2_23	MCS-34_266,2	McClean South	Eearly hydrothermal muscovites	Altered	221.563	11.3233	5.79721	0.286892	0.752961	1638.9	27.2	5.55817	45.3929	234.828	90.5536	0.408703	2.36934
Session 1	193 nm	MCS-34_266,2_24	MCS-34_266,2	McClean South	Eearly hydrothermal muscovites	Altered	144.795	7.20887	4.06146	0.182522	0.831978	1656	20.7	6.06426	34.6974	167.437	64.5667	0.445917	1.81107
Session 1	193 nm	MCS-34_266,2_25	MCS-34_266,2	McClean South	Eearly hydrothermal muscovites	Altered	535.109	24.6428	13.2006	0.571514	0.833335	1656.4	20.6	4.3769	81.3949	446.61	172.221	0.321842	4.24851
Session 1	193 nm	MCS-34_266,2_26	MCS-34_266,2	McClean South	Eearly hydrothermal muscovites	Altered	173.909	9.02772	4.90329	0.174945	0.804484	1711.3	22.4	7.3077	49.7093	242.339	93.45	0.53735	2.63478
Session 1	193 nm	MCS-34_266,2_27	MCS-34_266,2	McClean South	Eearly hydrothermal muscovites	Altered	914.132	73.4232	22.1565	1.65358	0.961305	1662.4	17.6	2.67558	83.5133	466.388	179.847	0.196741	4.35908
Session 1	193 nm	MCS-34_266,2_28	MCS-34_266,2	McClean South	Eearly hydrothermal muscovites	Preserved	144.552	4.28728	4.24778	0.137953	0.628378	1733.4	21.9	7.78706	46.5985	216.135	83.3455	0.576579	2.44918
Session 1	193 nm	MCS-34_266,2_29	MCS-34_266,2	McClean South	Eearly hydrothermal muscovites	Altered	146.71	8.74321	4.18644	0.213624	0.847218	1687.9	23.3	6.23245	36.757	174.357	67.235	0.458285	1.91858
Session 1	193 nm	MCS-34_266,2_30	MCS-34_266,2	McClean South	Eearly hydrothermal muscovites	Altered	288.89	33.9094	7.11675	0.687883	0.95568	1586	25	4.53696	45.4866	249.93	96.3772	0.333612	2.37423
Session 1	193 nm	MCS-34_266,2_31	MCS-34_266,2	McClean South	Eearly hydrothermal muscovites	Altered	322.756	31.0879	7.83973	0.580117	0.948638	1578.9	23.2	5.31785	60.0525	334.647	129.046	0.399825	3.13452
Session 1	193 nm	MCS-34_266,2_32	MCS-34_266,2	McClean South	Eearly hydrothermal muscovites	Altered	341.771	16.0823	8.50879	0.354233	0.837172	1625.1	19.5	5.3774	64.458	350.452	135.14	0.395411	3.36447
Session 1	193 nm	MCS-34_266,2_33	MCS-34_266,2	McClean South	Eearly hydrothermal muscovites	Altered	351.597	24.0783	8.89882	0.523911	0.947896	1655.4	16.5	5.44856	68.3048	365.298	140.865	0.400644	3.56526
Session 1	193 nm	MCS-34_266,2_34	MCS-34_266,2	McClean South	Eearly hydrothermal muscovites	Altered	525.725	24.4967	13.2313	0.562944	0.938295	1687.9	12.8	4.2231	78.7174	423.36	163.255	0.310533	4.10876
Session 1	193 nm	MCS-34_266,2_35	MCS-34_266,2	McClean South	Eearly hydrothermal muscovites	Altered	188.479	18.775	5.19968	0.412305	0.960955	1693.2	20.3	7.68044	56.26	276.038	106.445	0.564758	2.93656
Session 1	193 nm	MCS-34_266,2_36	MCS-34_266,2	McClean South	Eearly hydrothermal muscovites	Altered	341.518	18.2118	8.83702	0.499653	0.904057	1688.2	20.2	5.42273	67.5088	353.143	136.178	0.398744	3.52371
Session 1	193 nm	MCS-34_266,2_37	MCS-34_266,2	McClean South	Eearly hydrothermal muscovites	Preserved	218.583	8.29924	6.04258	0.185527	0.775949	1727.7	18.5	6.80216	57.9037	283.52	109.33	0.500177	3.02236
Session 1	193 nm	MCS-34_266,2_38	MCS-34_266,2	McClean South	Eearly hydrothermal muscovites	Altered	163.36	14.7983	4.47935	0.301334	0.862589	1649.9	31.8	5.74794	36.2714	179.052	69.0454	0.422658	1.89323
Session 1	193 nm	MCS-34_266,2_39	MCS-34_266,2	McClean South	Eearly hydrothermal muscovites	Altered	329.962	21.4768	8.35713	0.450307	0.895532	1648.5	21.7	5.27676	62.1242	332.01	128.029	0.388011	3.24266
Session 1	193 nm	MCS-34_266,2B_1	MCS-34_266,2	McClean South	Eearly hydrothermal muscovites	Altered	615.76	57.2228	14.8643	0.993275	0.945356	1632	27.1	24.2789	508.492	5769.8	2224.93	3.61331	53.7092
Session 1	193 nm	MCS-34_266,2B_2	MCS-34_266,2	McClean South	Eearly hydrothermal muscovites	Altered	689.45	58.5635	16.2756	1.25165	0.909147	1603.9	27	23.1295	530.416	6154.46	2373.26	3.44226	56.025
Session 1	193 nm	MCS-34_266,2B_3	MCS-34_266,2	McClean South	Eearly hydrothermal muscovites	Altered	266.253	14.8965	6.63526	0.362014	0.864349	1592.1	21.8	47.7143	446.085	4903.01	1890.68	7.10108	47.1175
Session 1	193 nm	MCS-34_266,2B_4	MCS-34_266,2	McClean South	Eearly hydrothermal muscovites	Altered	1310.69	200.887	30.371	4.44462	0.951938	1604.8	36.6	11.4758	491.081	5719.83	2205.67	1.68283	51.1094
Session 1	193 nm	MCS-34_266,2B_5	MCS-34_266,2	McClean South	Eearly hydrothermal muscovites	Altered	835.363	51.2403	20.36	1.48596	0.825448	1666.9	33.9	18.2358	532.216	5981.27	2306.48	2.76105	56.2151
Session 1	193 nm	MCS-34_266,2B_6	MCS-34_266,2	McClean South	Eearly hydrothermal muscovites	Altered	670.029	81.1385	16.556	1.95718	0.903457	1676	42.7	21.3455	497.935	5519.77	2128.52	3.17675	52.5942
Session 1	193 nm	MCS-34_266,2B_7	MCS-34_266,2	McClean South	Eearly hydrothermal muscovites	Altered	994.99	75.2759	23.7974	1.44505	0.900362	1644.7	26.4	16.3972	549.806	6296.62	2428.08	2.44031	58.0731
Session 1	193 nm	MCS-34_266,2B_8	MCS-34_266,2	McClean South	Eearly hydrothermal muscovites	Altered	206.488	13.7767	5.31383	0.339103	0.670157	1599	39.5	51.5363	385.863	4107.03	1583.74	7.6699	40.7566
Session 1	193 nm	MCS-34_266,2B_9	MCS-34_266,2	McClean South	Eearly hydrothermal muscovites	Altered	169.575	8.01015	4.40685	0.189995	0.714287	1573.2	24.6	71.1973	442.083	4659.56	1796.81	10.596	46.6948
Session 1	193 nm	MCS-34_266,2B_10	MCS-34_266,2	McClean South	Eearly hydrothermal muscovites	Altered	92.3692	10.6897	2.75776	0.157293	0.731913	1611.7	48.3	106.074	412.169	3781.42	1458.18	15.7864	43.5352
Session 1	193 nm	MCS-34_266,2B_11	MCS-34_266,2	McClean South	Eearly hydrothermal muscovites	Altered	218.243	15.2499	5.92991	0.428921	0.785051	1698.2	37.8	32.3829	270.568	2727.57	1051.8	4.8194	28.5786
Session 1	193 nm	MCS-34_266,2B_12	MCS-34_266,2	McClean South	Eearly hydrothermal muscovites	Altered	105.385	4.9	3.05502	0.132652	0.776546	1612.2	21.9	92.5352	398.32	3763.6	1451.31	13.7716	42.0724
Session 1	193 nm	MCS-34_266,2B_13	MCS-34_266,2	McClean South	Eearly hydrothermal muscovites	Altered	228.16	17.5589	5.92899	0.404005	0.906255	1633.2	23.9	50.7902	424.299	4472.37	1724.62	7.55886	44.8164
Session 1	193 nm	MCS-34_266,2B_14	MCS-34_266,2	McClean South	Eearly hydrothermal muscovites	Altered	499.48	41.315	11.9414	0.83258	0.917128	1600.1	24.7	24.0328	404.364	4632.79	1786.48	3.57668	42.7107
Session 1	193 nm	MCS-34_266,2B_15	MCS-34_266,2	McClean South	Eearly hydrothermal muscovites	Altered	356.507	30.9623	9.10099	0.532576	0.898051	1671.2	31.3	33.3728	421.574	4591.78	1770.67	4.96671	45.202
Session 1	193 nm	MCS-34_266,2B_16	MCS-34_266,2	McClean South	Eearly hydrothermal muscovites	Altered	211.186	9.93345	5.76824	0.22756	0.662196	1700.5	28	31.0052	251.993	2527.08	974.486	4.61435	26.6167
Session 1	193 nm	MCS-34_266,2B_17	MCS-34_266,2	McClean South	Eearly hydrothermal muscovites	Altered	243.179	11.7878	6.35247	0.316689	0.861659	1652.9	20.7	38.9541	348.664	3655.94	1409.79	5.79736	36.8275
Session 1	193 nm	MCS-34_266,2B_18	MCS-34_266,2	McClean South	Eearly hydrothermal muscovites	Altered	147.145	8.9353	4.03512	0.189128	0.890827	1623.6	18.6	67.543	384.016	3835.71	1479.12	10.0521	40.5615
Session 1	193 nm	MCS-34_266,2B_19	MCS-34_266,2	McClean South	Eearly hydrothermal muscovites	Altered	199.18	14.313	5.34989	0.37132	0.889179	1660.7	26.1	47.7899	360.241	3673.68	1416.63	7.11234	38.0502
Session 1	193 nm	MCS-34_266,2B_20	MCS-34_266,2	McClean South	Eearly hydrothermal muscovites	Altered	190.302	10.4871	5.12464	0.244112	0.890433	1655.3	18.3	39.8471	287.721	2926.58	1128.54	5.93025	30.3904
Session 1	193 nm	MCS-34_266,2B_21	MCS-34_266,2	McClean South	Eearly hydrothermal muscovites	Altered	265.063	16.8037	6.75383	0.299655	0.802232	1626.7	27.5	42.4879	404.322	4346.45	1676.06	6.32327	42.7063
Session 1	193 nm	MCS-34_266,2B_22	MCS-34_266,2	McClean South	Eearly hydrothermal muscovites	Altered	41.1801	1.85867	1.57454	0.0345271	0.610149	1594.3	17.2	73.8508	163.84	1173.71	452.604	10.9909	17.3055
Session 1	193 nm	MCS-34_266,2B_23	MCS-34_266,2	McClean South	Eearly hydrothermal muscovites	Altered	86.3969	4.0622	2.56281	0.088178	0.833056	1575.9	15.7	82.3205	297.26	2744.9	1058.48	12.2514	31.398
Session 1	193 nm	MCS-34_266,2B_24	MCS-34_266,2	McClean South	Eearly hydrothermal muscovites	Altered	462.519	40.876	11.3311	1.13944	0.969538	1632.2	23	33.6202	536.767	6001.36	2314.23	5.00353	56.6957
Session 1	193 nm	MCS-34_266,2B_25	MCS-34_266,2	McClean South	Eearly hydrothermal muscovites	Altered	505.68	44.5899	12.1185	0.930918	0.954758	1604.9	19.8	29.3225	500.68	5722.64	2206.75	4.36393	52.8841
Session 1	193 nm	MCS-34_266,2B_26	MCS-34_266,2	McClean South	Eearly hydrothermal muscovites	Altered	286.519	11.6151	7.19008	0.327694	0.869867	1614.1	18.1	30.3489	303.561	3313.33	1277.68	4.45931	32.0628
Session 1	193 nm	MCS-34_266,2B_27	MCS-34_266,2	McClean South	Eearly hydrothermal muscovites	Altered	317.448	44.027	8.23746	0.929568	0.981509	1683.2	22.6	32.0122	371.553	3922	1512.39	4.76423	39.2451
Session 1	193 nm	MCS-34_266,2B_28	MCS-34_266,2	McClean South	Eearly hydrothermal muscovites	Altered	1827.12	181.008	41.794	5.1666	0.934941	1593.9	37.4	8.43442	496.685	5947.62	2293.5	1.25525	52.4621
Session 1	193 nm	MCS-34_266,2B_29	MCS-34_266,2	McClean South	Eearly hydrothermal muscovites	Altered	373.595	44.8595	9.17926	0.876765	0.988223	1614.6	18	32.104	415.22	4628.92	1784.99	4.77788	43.8574
Session 1	193 nm	MCS-34_266,2B_30	MCS-34_266,2	McClean South	Eearly hydrothermal muscovites	Altered	1450.74	132.51	33.6742	3.06486	0.942143	1610.8	24.5	11.3625	539.119	6361.87	2453.25	1.69103	56.9442
Session 1	193 nm	MCS-34_266,2B_31	MCS-34_266,2	McClean South	Eearly hydrothermal muscovites	Altered	1731.51	159.545	39.011	3.24725	0.962178	1568.9	19.4	8.62246	473.947	5762.03	2221.94	1.28324	50.0604
Session 1	193 nm	MCS-34_266,2B_32	MCS-34_266,2	McClean South	Eearly hydrothermal muscovites	Altered	3305.46	518.632	77.7374	12.0804	0.989058	1649.6	18.8	5.40619	592.152	6896.72	2659.5	0.804578	62.5457
Session 1	193 nm	MCS-34_266,2B_33	MCS-34_266,2	McClean South	Eearly hydrothermal muscovites	Altered	1581.85	200.564	37.2187	4.59644	0.97823	1635.1	20.9	10.3177	541.075	6298.97	2428.99	1.53554	57.1508
Session 1	193 nm	MCS-34_266,2B_34	MCS-34_266,2	McClean South	Eearly hydrothermal muscovites	Altered	1028.44	67.9179	25.2059	1.88522	0.962187	1686.5	18.2	15.8435	562.686	6288.56	2424.98	2.35792	59.4334
Session 1	193 nm	MCS-34_266,2B_35	MCS-34_266,2	McClean South	Eearly hydrothermal muscovites	Altered	846.541	60.598	20.381	1.45726	0.947814	1647.5	18.6	13.3962	384.697	4311.42	1662.56	1.96394	40.0271
Session 1	193 nm	MCS-34_266,2B_36	MCS-34_266,2	McClean South	Eearly hydrothermal muscovites	Altered	1488.85	176.584	35.0393	4.6176	0.85912	1633.7	54.5	13.6358	673.205	7699.9	2969.21	1.9943	69.8788
Session 1	193 nm	MCS-34_266,2B_37	MCS-34_266,2	McClean South	Eearly hydrothermal muscovites	Altered	259.824	52.4769	6.64741	1.17791	0.991827	1630.1	18.9	37.663	352.76	3776.71	1456.36	5.60521	37.2601
Session 1	193 nm	MCS-34_266,2B_38	MCS-34_266,2	McClean South	Eearly hydrothermal muscovites	Altered	1787.63	137.49	41.8218	3.03793	0.823786	1629.3	35.5	12.1141	713.849	8357.75	3222.89	1.80288	75.4
Session 1	193 nm	MCS-34_266,2B_39	MCS-34_266,2	McClean South	Eearly hydrothermal muscovites	Altered	359.365	35.5343	9.06994	0.706454	0.879239	1653.5	35.7	31.6973	405.078	4396.21	1695.26	4.71736	42.7862
Session 1	193 nm	MCS-34_266,2B_40	MCS-34_266,2	McClean South	Eearly hydrothermal muscovites	Altered	758.274	55.8695	18.1669	1.2618	0.84261	1633.4	31.8	19.3587	495.527	5665.28	2184.63	2.88106	52.3398
Session 1	193 nm	MCS-34_273,7_1	MCS-34_273,7	McClean South	Eearly hydrothermal muscovites	Altered	647.303	54.5924	15.6921	1.20398	0.789206	1635.9	41.4	3.26655	72.2281	398.025	153.485	0.237115	3.72083
Session 1	193 nm	MCS-34_273,7_2	MCS-34_273,7	McClean South	Eearly hydrothermal muscovites	Altered	492.194	37.4188	12.1583	0.701941	0.857741	1642.8	30	3.62645	62.1288	335.994	129.565	0.26324	3.20056
Session 1	193 nm	MCS-34_273,7_3	MCS-34_273,7	McClean South	Eearly hydrothermal muscovites	Altered	434.113	32.6577	10.6778	0.531104	0.83521	1623	31.8	3.90406	59.1064	327.698	126.366	0.29109	3.10819
Session 1	193 nm	MCS-34_273,7_4	MCS-34_273,7	McClean South	Eearly hydrothermal muscovites	Altered	819.351	69.0889	19.577	1.67031	0.904072	1628.2	29.5	2.44979	67.5792	385.591	148.691	0.181474	3.55272
Session 1	193 nm	MCS-34_273,7_5	MCS-34_273,7	McClean South	Eearly hydrothermal muscovites	Altered	802.548	48.2038	18.7105	0.863157	0.848783	1588	24.1	2.89117	77.3483	436.775	168.428	0.209866	3.9267
Session 1	193 nm	MCS-34_273,7_6	MCS-34_273,7	McClean South	Eearly hydrothermal muscovites	Altered	410.719	29.0204	10.2409	0.55583	0.897765	1638.8	23.7	4.33975	62.6238	330.73	127.535	0.310517	3.17998
Session 1	193 nm	MCS-34_273,7_7	MCS-34_273,7	McClean South	Eearly hydrothermal muscovites	Altered	799.605	76.7887	19.2795	1.64049	0.956508	1641.4	22	2.58602	70.2529	389.243	150.099	0.187716	3.61908
Session 1	193 nm	MCS-34_273,7_8	MCS-34_273,7	McClean South	Eearly hydrothermal muscovites	Altered	807.309	46.1911	19.0507	0.948771	0.818851	1607.4	25.4	2.64282	69.7311	401.624	154.873	0.191839	3.65466
Session 1	193 nm	MCS-34_273,7_9	MCS-34_273,7	McClean South	Eearly hydrothermal muscovites	Altered	600.445	45.5145	14.5382	0.964811	0.904934	1628	24.7	3.0602	62.6898	345.889	133.381	0.222137	3.22946
Session 1	193 nm	MCS-34_273,7_10	MCS-34_273,7	McClean South	Eearly hydrothermal muscovites	Altered	353.942	19.7044	9.03095	0.421549	0.728931	1657.8	29.7	4.66156	59.32	314.928	121.442	0.343112	3.09863
Session 1	193 nm	MCS-34_273,7_11	MCS-34_273,7	McClean South	Eearly hydrothermal muscovites	Altered	367.594	26.6278	9.16477	0.549376	0.871765	1625.2	26.3	5.01092	64.7107	346.736	133.707	0.363737	3.33357
Session 1	193 nm	MCS-34_273,7_12	MCS-34_273,7	McClean South	Eearly hydrothermal muscovites	Altered	628.433	43.6636	15.1082	0.807285	0.831911	1620.2	29.4	3.58745	76.3721	417.833	161.124	0.25639	3.87357
Session 1	193 nm	MCS-34_273,7_13	MCS-34_273,7	McClean South	Eearly hydrothermal muscovites	Altered	488.933	33.0746	11.9127	0.655434	0.810594	1620	29.9	4.63956	77.8799	427.011	164.663	0.336781	4.01198
Session 1	193 nm	MCS-34_273,7_15	MCS-34_273,7	McClean South	Eearly hydrothermal muscovites	Altered	232.649	12.7869	5.97121	0.285722	0.77212	1600.3	25.7	6.62535	55.7452	290.151	111.887	0.480926	2.87171
Session 1	193 nm	MCS-34_273,7_16	MCS-34_273,7	McClean South	Eearly hydrothermal muscovites	Altered	263.766	36.36	6.96466	1.00743	0.931482	1668.9	44.4	6.8588	67.3108	340.55	131.322	0.497873	3.46751
Session 1	193 nm	MCS-34_273,7_17	MCS-34_273,7	McClean South	Eearly hydrothermal muscovites	Altered	244.306	42.4002	6.09717	0.919116	0.946421	1565.3	38.7	8.14127	69.9451	374.403	144.376	0.590965	3.60322
Session 1	193 nm	MCS-34_273,7_18	MCS-34_273,7	McClean South	Eearly hydrothermal muscovites	Altered	332.239	67.0053	8.31838	1.48447	0.973486	1618.6	33.7	5.74948	66.169	353.154	136.182	0.409893	3.40964
Session 1	193 nm	MCS-34_273,7_19	MCS-34_273,7	McClean South	Eearly hydrothermal muscovites	Altered	171.919	14.0511	4.61251	0.316895	0.902549	1605.2	24.1	8.9308	58.045	289.021	111.451	0.648277	2.99018
Session 1	193 nm	MCS-34_273,7_20	MCS-34_273,7	McClean South	Eearly hydrothermal muscovites	Altered	584.971	43.1815	13.8201	0.73271	0.892297	1586.9	25.9	4.05088	78.8855	446.064	172.01	0.294049	4.06378
Session 1	193 nm	MCS-34_273,7B_1	MCS-34_273,7	McClean South	Eearly hydrothermal muscovites	Altered	939.525	59.4882	20.4614	1.27026	0.940941	1492.6	15.7	2.23541	64.3991	385.973	148.838	0.158418	3.24146
Session 1	193 nm	MCS-34_273,7B_2	MCS-34_273,7	McClean South	Eearly hydrothermal muscovites	Altered	516.705	24.7885	12.9355	0.813138	0.929196	1669.4	22	3.24857	58.5173	308.572	118.991	0.230288	2.97889
Session 1	193 nm	MCS-34_273,7B_3	MCS-34_273,7	McClean South	Eearly hydrothermal muscovites	Altered	695.449	40.0347	16.6197	0.825906	0.953036	1618	13.5	2.9707	70.5042	380.151	146.593	0.210789	3.50324
Session 1	193 nm	MCS-34_273,7B_4	MCS-34_273,7	McClean South	Eearly hydrothermal muscovites	Altered	567.623	28.7107	13.9485	0.591457	0.944709	1647.4	13	3.10945	61.8535	328.956	126.851	0.223478	3.11717
Session 1	193 nm	MCS-34_273,7B_5	MCS-34_273,7	McClean South	Eearly hydrothermal muscovites	Altered	646.674	41.8175	16.1081	0.939106	0.956536	1680.3	14.9	2.85044	64.6941	339.112	130.767	0.202216	3.25731
Session 1	193 nm	MCS-34_273,7B_6	MCS-34_273,7	McClean South	Eearly hydrothermal muscovites	Altered	654.538	37.4817	16.2392	0.85518	0.931632	1674.6	16.5	2.80304	64.1643	338.03	130.35	0.199148	3.23401
Session 1	193 nm	MCS-34_273,7B_7	MCS-34_273,7	McClean South	Eearly hydrothermal muscovites	Altered	659.485	37.353	16.4261	0.986184	0.893041	1681.6	22.5	2.87926	66.6363	349.912	134.932	0.204602	3.36083
Session 1	193 nm	MCS-34_273,7B_8	MCS-34_273,7	McClean South	Eearly hydrothermal muscovites	Altered	670.077	47.4845	16.5764	0.92678	0.926966	1671.5	21.7	2.59137	61.4854	320.135	123.449	0.184232	3.0539
Session 1	193 nm	MCS-34_273,7B_9	MCS-34_273,7	McClean South	Eearly hydrothermal muscovites	Altered	332.719	11.3087	8.43427	0.306506	0.761221	1638.8	19.3	4.58137	54.4612	280.537	108.18	0.325139	2.74231
Session 1	193 nm	MCS-34_273,7B_10	MCS-34_273,7	McClean South	Eearly hydrothermal muscovites	Altered	571.226	33.4528	13.9308	0.743288	0.915464	1635.6	18.2	3.29808	64.7482	347.278	133.916	0.234437	3.2659
Session 1	193 nm	MCS-34_273,7B_11	MCS-34_273,7	McClean South	Eearly hydrothermal muscovites	Altered	901.01	48.8984	22.2837	0.954446	0.917376	1690.3	18	2.17812	68.3878	362.167	139.658	0.155001	3.454
Session 1	193 nm	MCS-34_273,7B_12	MCS-34_273,7	McClean South	Eearly hydrothermal muscovites	Altered	545.158	22.3009	13.9618	0.540152	0.897907	1712.4	14.8	3.6795	72.3713	370.263	142.78	0.261906	3.65667
Session 1	193 nm	MCS-34_273,7B_13	MCS-34_273,7	McClean South	Eearly hydrothermal muscovites	Altered	769.372	46.3007	19.4062	1.25943	0.956293	1713.7	16.5	2.58414	70.6866	367.271	141.626	0.18408	3.57229
Session 1	193 nm	MCS-34_273,7B_14	MCS-34_273,7	McClean South	Eearly hydrothermal muscovites	Altered	386.166	21.9079	8.9758	0.521783	0.904261	1522	18.7	4.89455	61.9352	349.206	134.66	0.348709	3.12994
Session 1	193 nm	MCS-34_273,7B_15	MCS-34_273,7	McClean South	Eearly hydrothermal muscovites	Altered	383.322	18.664	9.14693	0.384062	0.889855	1561.3	15.9	4.86977	63.081	350.37	135.109	0.352468	3.224
Session 1	193 nm	MCS-34_273,7B_16	MCS-34_273,7	McClean South	Eearly hydrothermal muscovites	Altered	985.849	73.8508	23.432	1.61851	0.956977	1629.9	17	2.25463	74.4286	410.984	158.482	0.160757	3.76687
Session 1	193 nm	MCS-34_273,7B_17	MCS-34_273,7	McClean South	Eearly hydrothermal muscovites	Altered	233.292	12.2231	6.03854	0.277804	0.842153	1614.2	20.7	6.65062	56.8116	292.413	112.76	0.483342	2.91868
Session 1	193 nm	MCS-34_273,7B_18	MCS-34_273,7	McClean South	Eearly hydrothermal muscovites	Altered	565.048	34.3508	13.888	0.803548	0.886959	1647.3	22.3	4.15312	81.2993	434.363	167.498	0.296431	4.11683
Session 1	193 nm	MCS-34_273,7B_19	MCS-34_273,7	McClean South	Eearly hydrothermal muscovites	Altered	623.465	27.0879	15.4217	0.712947	0.845995	1665.8	20.4	3.75673	81.6531	433.491	167.162	0.268117	4.13483
Session 1	193 nm	MCS-34_273,7B_20	MCS-34_273,7	McClean South	Eearly hydrothermal muscovites	Altered	951.868	59.4381	21.4755	1.2513	0.925873	1546.3	17.6	2.42294	73.3671	427.486	164.846	0.173182	3.71916
Session 1	193 nm	MCS-34_273,7B_21	MCS-34_273,7	McClean South	Eearly hydrothermal muscovites	Altered	842.277	64.8511	19.5287	1.48034	0.952588	1582.1	18.1	2.48814	68.4961	388.52	149.82	0.177875	3.47368
Session 1	193 nm	MCS-34_273,7B_22	MCS-34_273,7	McClean South	Eearly hydrothermal muscovites	Altered	879.756	59.0845	20.3726	1.3632	0.964679	1582.6	13.8	2.49431	71.5403	406.519	156.761	0.178186	3.63012
Session 1	193 nm	MCS-34_273,7B_23	MCS-34_273,7	McClean South	Eearly hydrothermal muscovites	Altered	628.381	43.6601	15.0101	1.03171	0.961289	1609.9	15.1	3.57227	75.5219	416.029	160.428	0.255303	3.83213
Session 1	193 nm	MCS-34_273,7B_24	MCS-34_273,7	McClean South	Eearly hydrothermal muscovites	Altered	747.89	44.7481	17.3691	0.836588	0.952979	1577.6	14.5	3.01753	74.8572	418.443	161.359	0.215752	3.74743
Session 1	193 nm	MCS-34_273,7B_25	MCS-34_273,7	McClean South	Eearly hydrothermal muscovites	Altered	749.539	45.5532	17.4258	0.965438	0.923076	1579.4	17.6	2.9688	72.8891	413.066	159.285	0.212511	3.70318
Session 1	193 nm	MCS-34_273,7B_26	MCS-34_273,7	McClean South	Eearly hydrothermal muscovites	Altered	537.568	29.2082	13.4266	0.6563	0.921048	1669.2	16.5	3.67846	69.5582	366.997	141.52	0.26326	3.53469
Session 1	193 nm	MCS-34_273,7B_27	MCS-34_273,7	McClean South	Eearly hydrothermal muscovites	Altered	557.58	28.9364	13.8521	0.647485	0.885139	1663.7	19	3.64724	71.1744	377.549	145.589	0.26111	3.61691
Session 1	193 nm	MCS-34_273,7B_28	MCS-34_273,7	McClean South	Eearly hydrothermal muscovites	Altered	979.57	69.6198	22.2591	1.55856	0.953445	1558.7	16.4	2.46466	77.3118	448.471	172.938	0.176545	3.92973
Session 1	193 nm	MCS-34_273,7B_29	MCS-34_273,7	McClean South	Eearly hydrothermal muscovites	Altered	552.153	36.4265	12.6672	0.788285	0.927356	1536.9	18.1	3.76449	67.1512	385.883	148.803	0.269497	3.41378
Session 1	193 nm	MCS-34_273,7B_30	MCS-34_273,7	McClean South	Eearly hydrothermal muscovites	Altered	531.801	34.4291	11.9637	0.631505	0.905118	1504.3	19.4	4.09305	69.8988	404.792	156.095	0.293521	3.51159
Session 1	193 nm	MCS-34_273,7B_31	MCS-34_273,7	McClean South	Eearly hydrothermal muscovites	Altered	504.386	42.3221	12.0263	0.877435	0.838772	1588.6	34.2	4.24506	71.9892	398.493	153.666	0.304658	3.6639
Session 1	193 nm	MCS-34_273,7B_32	MCS-34_273,7	McClean South	Eearly hydrothermal muscovites	Altered	733.216	43.8334	17.8407	0.887365	0.775307	1650.7	29.9	2.79397	70.2633	381.237	147.011	0.200502	3.5771
Session 1	193 nm	MCS-34_273,7B_33	MCS-34_273,7	McClean South	Eearly hydrothermal muscovites	Altered	859.775	48.1461	20.6765	0.896288	0.696423	1641.5	31.8	2.54546	74.1702	407.376	157.091	0.182712	3.77785
Session 1	193 nm	MCS-34_273,7B_34	MCS-34_273,7	McClean South	Eearly hydrothermal muscovites	Altered	755.388	50.4809	18.1029	0.873555	0.803655	1628	30.8	3.49229	89.0983	491.112	189.381	0.250707	4.53853
Session 1	193 nm	MCS-34_273,7B_35	MCS-34_273,7	McClean South	Eearly hydrothermal muscovites	Altered	521.032	25.8093	11.994	0.608731	0.924402	1537.2	14.7	4.03662	68.0753	391.11	150.819	0.289462	3.47181
Session 1	193 nm	MCS-34_273,7B_36	MCS-34_273,7	McClean South	Eearly hydrothermal muscovites	Altered	409.656	22.028	9.66433	0.522917	0.91947	1551.2	16.3	4.60468	62.7162	351.677	135.613	0.331041	3.19928
Session 1	193 nm	MCS-34_273,7B_37	MCS-34_273,7	McClean South	Eearly hydrothermal muscovites	Altered	486.454	28.4227	11.4396	0.744198	0.942979	1563.7	17.5	4.05464	65.8696	376.09	145.027	0.298131	3.4105
Session 1	193 nm	MCS-34_273,7B_38	MCS-34_273,7	McClean South	Eearly hydrothermal muscovites	Altered	605.893	37.7179	14.3486	0.824433	0.920007	1593.5	18.4	3.58009	71.2255	397.969	153.464	0.253285	3.63428
Session 1	193 nm	MCS-34_273,7B_39	MCS-34_273,7	McClean South	Eearly hydrothermal muscovites	Altered	560.44	36.2629	13.1799	0.76235	0.93014	1576.3	17.6	3.46345	64.3671	362.069	139.62	0.249126	3.28345
Session 1	193 nm	MCS-34_273,7B_40	MCS-34_273,7	McClean South	Eearly hydrothermal muscovites	Altered	560.44	36.2629	13.1799	0.76235	0.93014	1576.3	17.6	3.46345	64.3671	362.069	139.62	0.249126	3.28345
Session 2	193 nm	MCS-03_253_1	MCS-03_253	McClean South	Metamorphic muscovites	Altered	733.172	35.6478	16.889	0.771661	0.95281	1564.77	11	2.38243	56.6958	342.77	132.178	0.180283	3.0448
Session 2	193 nm	MCS-03_253_2	MCS-03_253	McClean South	Metamorphic muscovites	Altered	454.988	18.319	10.7259	0.468801	0.940371	1562.71	11.79	2.86367	43.2794	255.597	98.5626	0.216627	2.32351
Session 2	193 nm	MCS-03_253_3	MCS-03_253	McClean South	Metamorphic muscovites	Altered	547.83	21.3628	13.0733	0.533048	0.935018	1598.76	11.47	2.73415	50.3656	293.727	113.266	0.206754	2.70296
Session 2	193 nm	MCS-03_253_4	MCS-03_253	McClean South	Metamorphic muscovites	Altered	372.496	11.4849	9.12085	0.246792	0.845013	1600.18	12.28	3.16591	40.6873	231.195	89.1526	0.239339	2.18297
Session 2	193 nm	MCS-03_253_6	MCS-03_253	McClean South	Metamorphic muscovites	Altered	308.435	10.3401	7.54371	0.276725	0.725402	1573.62	19.88	3.75558	39.9198	226.597	87.3798	0.283301	2.13714
Session 2	193 nm	MCS-03_253_7	MCS-03_253	McClean South	Metamorphic muscovites	Altered	285.85	13.037	7.11121	0.290748	0.911128	1588.99	13.59	3.86833	38.3897	216.238	83.385	0.291709	2.0744
Session 2	193 nm	MCS-03_253_8	MCS-03_253	McClean South	Metamorphic muscovites	Altered	218.03	6.26801	5.72306	0.185742	0.880558	1626.77	12.67	5.21801	42.0784	222.423	85.7703	0.393388	2.25138
Session 2	193 nm	MCS-03_253_9	MCS-03_253	McClean South	Metamorphic muscovites	Altered	208.943	7.70007	5.43085	0.199387	0.813436	1602.47	17.01	5.33657	40.8372	220.978	85.213	0.407829	2.21486
Session 2	193 nm	MCS-03_253_10	MCS-03_253	McClean South	Metamorphic muscovites	Altered	181.433	5.92801	4.79052	0.153495	0.891446	1596.72	11.47	6.34723	42.8443	225.031	86.776	0.478281	2.29121
Session 2	193 nm	MCS-03_253_11	MCS-03_253	McClean South	Metamorphic muscovites	Altered	303.88	9.70129	7.49231	0.24861	0.595668	1584.05	22.09	4.90106	52.2115	293.108	113.027	0.371947	2.78674
Session 2	193 nm	MCS-03_253_12	MCS-03_253	McClean South	Metamorphic muscovites	Altered	226.952	7.45179	5.88166	0.161389	0.855116	1614.15	12.15	4.79097	40.0244	211.991	81.7474	0.360197	2.11856
Session 2	193 nm	MCS-03_253_13	MCS-03_253	McClean South	Metamorphic muscovites	Altered	204.696	5.72758	5.34383	0.121096	0.780383	1605.19	12.41	5.16618	38.8999	206.125	79.4854	0.38831	2.07506
Session 2	193 nm	MCS-03_253_14	MCS-03_253	McClean South	Metamorphic muscovites	Altered	227.119	8.19304	6.03323	0.193068	0.911389	1654.22	10.97	4.52591	38.4753	200.31	77.2429	0.340099	2.0519
Session 2	193 nm	MCS-03_253_15	MCS-03_253	McClean South	Metamorphic muscovites	Altered	14.761	0.444743	1.0481	0.0161291	0.779131	1623.88	7.95	19.9638	29.5996	57.4602	22.1577	1.5011	1.5733
Session 2	193 nm	MCS-03_253_16	MCS-03_253	McClean South	Metamorphic muscovites	Altered	183.011	3.99374	4.79513	0.106923	0.726052	1586.58	12.19	6.39444	43.2045	227.551	87.7476	0.479467	2.29911
Session 2	193 nm	MCS-03_253_17	MCS-03_253	McClean South	Metamorphic muscovites	Altered	185.814	6.10346	4.87657	0.161067	0.911996	1592.59	10.78	5.92324	40.7005	213.937	82.4977	0.443981	2.1651
Session 2	193 nm	MCS-03_253_18	MCS-03_253	McClean South	Metamorphic muscovites	Altered	258.775	7.32155	6.14499	0.208238	0.913237	1502.34	11.1	4.60973	39.9138	231.813	89.3911	0.34544	2.12273
Session 2	193 nm	MCS-03_253_19	MCS-03_253	McClean South	Metamorphic muscovites	Altered	217.043	5.61077	5.55574	0.166842	0.839851	1585.95	12.94	5.18991	40.6283	218.845	84.3906	0.38882	2.16018
Session 2	193 nm	MCS-03_253_20	MCS-03_253	McClean South	Metamorphic muscovites	Altered	228.29	5.41658	5.81889	0.154643	0.913464	1588.96	8.9	5.27347	43.2378	233.832	90.1695	0.394977	2.29833
Session 2	193 nm	MCS-03_253_21	MCS-03_253	McClean South	Metamorphic muscovites	Altered	326.521	9.18636	7.98827	0.287503	0.739062	1581.94	18.98	3.89494	43.8409	246.541	95.0707	0.291162	2.32588
Session 2	193 nm	MCS-03_253_22	MCS-03_253	McClean South	Metamorphic muscovites	Altered	222.936	6.90772	5.78622	0.184553	0.910514	1613.09	10.62	5.05768	41.2356	218.503	84.2586	0.377949	2.1869
Session 2	193 nm	MCS-03_253_23	MCS-03_253	McClean South	Metamorphic muscovites	Altered	303.194	9.46048	7.8508	0.262663	0.892403	1662.34	12.47	4.08666	45.2073	240.053	92.5688	0.305312	2.39695
Session 2	193 nm	MCS-03_253_24	MCS-03_253	McClean South	Metamorphic muscovites	Altered	154.474	14.9817	4.11053	0.349571	0.985418	1569.61	11.47	6.28737	36.4161	188.119	72.5421	0.469607	1.93034
Session 2	193 nm	MCS-03_253_25	MCS-03_253	McClean South	Metamorphic muscovites	Altered	205.913	5.58508	5.19085	0.184217	0.669432	1551.8	20.24	4.95961	36.7225	198.054	76.3732	0.3709	1.92529
Session 2	193 nm	MCS-03_253_26	MCS-03_253	McClean South	Metamorphic muscovites	Altered	744.532	45.4146	17.2506	1.05587	0.979795	1574.74	9.6	2.73	66.3581	392.823	151.48	0.203456	3.50974
Session 2	193 nm	MCS-03_253_28	MCS-03_253	McClean South	Metamorphic muscovites	Altered	304.868	14.2028	7.61983	0.302478	0.931757	1606.02	12.2	4.96267	53.2828	292.231	112.689	0.369633	2.81654
Session 2	193 nm	MCS-03_253_29	MCS-03_253	McClean South	Metamorphic muscovites	Altered	328.499	13.1314	7.92967	0.306856	0.913186	1561.92	12.22	3.28709	36.7277	208.512	80.406	0.244768	1.94093
Session 2	193 nm	MCS-03_253_30	MCS-03_253	McClean South	Metamorphic muscovites	Altered	76.7805	3.14998	2.37403	0.0860781	0.887469	1560.63	13.09	12.1133	40.5206	179.554	69.2392	0.901781	2.14085
Session 2	193 nm	MCS-03_253_31	MCS-03_253	McClean South	Metamorphic muscovites	Altered	1162.73	68.333	27.3305	1.39084	0.971267	1620.28	11.55	1.84124	70.9062	412.501	159.067	0.136805	3.73896
Session 2	193 nm	MCS-03_253_32	MCS-03_253	McClean South	Metamorphic muscovites	Altered	732.939	43.648	17.7106	0.981919	0.974677	1640.51	10.36	2.82685	70.5443	399.08	153.892	0.209966	3.71863
Session 2	193 nm	MCS-03_253_33	MCS-03_253	McClean South	Metamorphic muscovites	Altered	395.786	16.7448	9.89411	0.379192	0.958004	1640.63	9.15	3.60593	49.7969	272.551	105.1	0.265548	2.62736
Session 2	193 nm	MCS-03_253_34	MCS-03_253	McClean South	Metamorphic muscovites	Altered	569.589	21.8525	14.021	0.492815	0.935314	1651.9	10.55	2.71986	53.7342	298.253	115.012	0.20192	2.83112
Session 2	193 nm	MCS-03_253_35	MCS-03_253	McClean South	Metamorphic muscovites	Altered	329.498	11.6271	8.33676	0.293565	0.936553	1636.69	10	3.85961	45.8826	247.708	95.5207	0.289898	2.41681
Session 2	193 nm	MCS-03_253,6_2	MCS-03_253,6	McClean South	Metamorphic muscovites	Altered	297.67	11.623	7.29594	0.218973	0.829579	1576.88	15.46	4.52788	46.2729	259.776	100.174	0.336528	2.45529
Session 2	193 nm	MCS-03_253,6_3	MCS-03_253,6	McClean South	Metamorphic muscovites	Altered	430.607	25.2032	10.8005	0.49018	0.883316	1659.42	21.18	2.70442	41.1551	222.63	85.8502	0.19937	2.1533
Session 2	193 nm	MCS-03_253,6_4	MCS-03_253,6	McClean South	Metamorphic muscovites	Altered	364.429	18.8752	9.21016	0.372689	0.91103	1652.67	16.33	3.39331	44.0348	238.345	91.91	0.252203	2.32283
Session 2	193 nm	MCS-03_253,6_5	MCS-03_253,6	McClean South	Metamorphic muscovites	Altered	407.607	19.4028	9.88485	0.412709	0.917043	1599.26	14.01	3.24479	45.192	254.916	98.2999	0.241164	2.38387
Session 2	193 nm	MCS-03_253,6_7	MCS-03_253,6	McClean South	Metamorphic muscovites	Altered	190.55	13.0097	4.99447	0.309058	0.966598	1603.81	12.59	7.06593	49.7238	259.506	100.07	0.525164	2.62292
Session 2	193 nm	MCS-03_253,6_10	MCS-03_253,6	McClean South	Metamorphic muscovites	Altered	85.6748	3.1786	2.67251	0.0739287	0.747387	1636.91	15.87	11.4651	43.172	189.321	73.0055	0.852124	2.27731
Session 2	193 nm	MCS-03_253,6_11	MCS-03_253,6	McClean South	Metamorphic muscovites	Altered	135.902	8.31295	3.84759	0.216434	0.952601	1642.44	14.17	7.62282	41.3247	197.529	76.1704	0.560479	2.1565
Session 2	193 nm	MCS-03_253,6_12	MCS-03_253,6	McClean South	Metamorphic muscovites	Altered	167.918	6.53469	4.67843	0.136002	0.896963	1673.43	12.09	6.17043	40.6743	199.701	77.0083	0.458608	2.14556
Session 2	193 nm	MCS-03_253,6_15	MCS-03_253,6	McClean South	Metamorphic muscovites	Altered	237.999	8.87663	6.19649	0.239866	0.844443	1636.92	16.78	5.51751	48.1719	253.097	97.5987	0.41008	2.54106
Session 2	193 nm	MCS-03_253,6_16	MCS-03_253,6	McClean South	Metamorphic muscovites	Altered	299.076	11.5692	7.27128	0.270866	0.720591	1564.96	21	4.62813	47.4156	266.782	102.876	0.343978	2.50116
Session 2	193 nm	MCS-03_253,6_17	MCS-03_253,6	McClean South	Metamorphic muscovites	Altered	321.044	20.1546	8.03211	0.510878	0.970031	1619.86	12.84	3.89795	44.1134	241.196	93.0094	0.289709	2.32697
Session 2	193 nm	MCS-03_253,6_18	MCS-03_253,6	McClean South	Metamorphic muscovites	Altered	314.993	12.7494	7.78211	0.32547	0.899557	1597.23	14.44	3.90392	42.8059	237.012	91.396	0.290153	2.258
Session 2	193 nm	MCS-03_253,6_19	MCS-03_253,6	McClean South	Metamorphic muscovites	Altered	318.317	14.8431	7.87037	0.342223	0.926804	1599.89	13.05	4.12017	45.6894	252.781	97.4767	0.306225	2.4101
Session 2	193 nm	MCS-03_253,6_20	MCS-03_253,6	McClean South	Metamorphic muscovites	Altered	282.151	10.5532	7.18894	0.200764	0.89121	1630.42	12.49	4.47186	45.2958	243.186	93.7766	0.332364	2.38934
Session 2	193 nm	MCS-03_253,6_21	MCS-03_253,6	McClean South	Metamorphic muscovites	Altered	163.778	8.6228	4.62004	0.152153	0.796146	1687.71	22.57	6.96503	45.3391	219.861	84.782	0.517665	2.39163
Session 2	193 nm	MCS-03_253,6_22	MCS-03_253,6	McClean South	Metamorphic muscovites	Altered	192.115	12.0082	5.14916	0.291393	0.958166	1641.39	13.14	2.55572	18.5419	94.6331	36.4921	0.18995	0.978082
Session 2	193 nm	MCS-03_253,6_23	MCS-03_253,6	McClean South	Metamorphic muscovites	Altered	112.991	7.46919	3.28295	0.16715	0.95214	1626.37	12.88	4.08826	18.9107	89.0334	34.3328	0.303853	0.997534
Session 2	193 nm	MCS-03_253,6_26	MCS-03_253,6	McClean South	Metamorphic muscovites	Altered	195.984	10.5574	4.7948	0.226362	0.946654	1503.7	11.42	6.49653	43.471	245.398	94.6296	0.482845	2.31514
Session 2	193 nm	MCS-03_253,6_28	MCS-03_253,6	McClean South	Metamorphic muscovites	Altered	56.7796	3.61214	1.90444	0.0822106	0.935644	1556.44	11.77	12.3896	33.2453	135.588	52.285	0.920841	1.75368
Session 2	193 nm	MCS-03_252,8_1	MCS-03_252,8	McClean South	Metamorphic muscovites	Altered	486.131	31.268	11.3733	0.486647	0.937255	1547.8	19.1	2.64434	41.9711	251.354	96.9265	0.199384	2.26765
Session 2	193 nm	MCS-03_252,8_2	MCS-03_252,8	McClean South	Metamorphic muscovites	Altered	195.808	14.1116	4.99962	0.185684	0.944623	1539.7	22.1	6.13453	43.6895	236.705	91.2774	0.466157	2.33061
Session 2	193 nm	MCS-03_252,8_3	MCS-03_252,8	McClean South	Metamorphic muscovites	Altered	457.224	26.0435	11.0654	0.332278	0.935334	1594	21.4	3.0741	47.9303	277.029	106.827	0.233643	2.58535
Session 2	193 nm	MCS-03_252,8_4	MCS-03_252,8	McClean South	Metamorphic muscovites	Altered	361.205	20.1524	8.69739	0.245714	0.902957	1557.6	21.7	3.91912	48.029	279.066	107.613	0.297927	2.59118
Session 2	193 nm	MCS-03_252,8_5	MCS-03_252,8	McClean South	Metamorphic muscovites	Altered	310.911	17.5274	7.71079	0.236592	0.930312	1582	19.5	3.91867	42.5759	240.226	92.6353	0.297948	2.29741
Session 2	193 nm	MCS-03_252,8_6	MCS-03_252,8	McClean South	Metamorphic muscovites	Altered	391.005	22.4198	9.59151	0.300505	0.927919	1596.9	20.8	3.23791	43.7598	250.131	96.455	0.246685	2.36608
Session 2	193 nm	MCS-03_252,8_7	MCS-03_252,8	McClean South	Metamorphic muscovites	Altered	454.482	24.968	11.0933	0.352459	0.912203	1606.9	20.4	2.86251	44.7436	258.851	99.8174	0.219629	2.43641
Session 2	193 nm	MCS-03_252,8_8	MCS-03_252,8	McClean South	Metamorphic muscovites	Altered	388.675	21.581	9.49568	0.27118	0.890424	1589.7	22.6	3.45295	46.1997	265.266	102.291	0.263179	2.49907
Session 2	193 nm	MCS-03_252,8_9	MCS-03_252,8	McClean South	Metamorphic muscovites	Altered	780.54	103.836	18.6304	2.31188	0.994584	1618.4	10.8	2.23374	58.6378	344.68	132.915	0.170285	3.17249
Session 2	193 nm	MCS-03_252,8_10	MCS-03_252,8	McClean South	Metamorphic muscovites	Altered	443.536	27.866	10.8165	0.411027	0.945017	1602.7	20.3	3.55863	54.2368	312.094	120.349	0.27134	2.93496
Session 2	193 nm	MCS-03_252,8_11	MCS-03_252,8	McClean South	Metamorphic muscovites	Altered	634.615	36.4275	15.0006	0.495508	0.957639	1587.8	19.4	2.75338	58.7723	349.842	134.905	0.212578	3.1888
Session 2	193 nm	MCS-03_252,8_12	MCS-03_252,8	McClean South	Metamorphic muscovites	Altered	406.796	24.6167	9.83414	0.36321	0.923977	1578.9	20.2	3.38098	46.8488	272.558	105.103	0.258368	2.54083
Session 2	193 nm	MCS-03_252,8_13	MCS-03_252,8	McClean South	Metamorphic muscovites	Altered	94.9776	9.84042	3.00304	0.245788	0.967816	1646.1	16.9	11.3827	50.0874	222.836	85.9296	0.904735	2.71696
Session 2	193 nm	MCS-03_252,8_14	MCS-03_252,8	McClean South	Metamorphic muscovites	Altered	397.975	24.5009	10.0457	0.334821	0.924615	1645	23.4	3.11064	44.3889	247.728	95.5281	0.240036	2.41134
Session 2	193 nm	MCS-03_252,8_15	MCS-03_252,8	McClean South	Metamorphic muscovites	Altered	312.579	18.9746	8.1466	0.26544	0.938608	1662.4	21.9	3.85809	44.2862	239.124	92.2105	0.294999	2.40324
Session 2	193 nm	MCS-03_252,8_16	MCS-03_252,8	McClean South	Metamorphic muscovites	Altered	697.803	42.6053	17.576	0.568857	0.968856	1698.4	23.5	2.51695	62.9977	352.539	135.945	0.194818	3.42414
Session 2	193 nm	MCS-03_252,8_17	MCS-03_252,8	McClean South	Metamorphic muscovites	Altered	249.107	15.3588	6.59718	0.224219	0.893005	1648.1	23.1	5.15128	47.8839	255.013	98.3374	0.39476	2.6043
Session 2	193 nm	MCS-03_252,8_18	MCS-03_252,8	McClean South	Metamorphic muscovites	Altered	260.829	16.5194	6.56988	0.226357	0.942342	1576.8	20.4	4.67722	43.7195	242.488	93.5075	0.358502	2.35531
Session 2	193 nm	MCS-03_252,8_19	MCS-03_252,8	McClean South	Metamorphic muscovites	Altered	268.095	16.2762	7.00224	0.24664	0.895782	1639.5	22.1	4.09135	40.3664	218.066	84.09	0.313657	2.1963
Session 2	193 nm	MCS-03_252,8_20	MCS-03_252,8	McClean South	Metamorphic muscovites	Altered	363.006	22.9137	9.10747	0.378328	0.891066	1622.9	22.5	2.82815	36.2925	204.139	78.7197	0.216855	1.975
Session 2	193 nm	MCS-03_252,8_21	MCS-03_252,8	McClean South	Metamorphic muscovites	Altered	406.702	32.288	10.2315	0.641851	0.954791	1642.3	18.6	3.52502	50.8175	285.639	110.147	0.270831	2.77099
Session 2	193 nm	MCS-03_252,8_22	MCS-03_252,8	McClean South	Metamorphic muscovites	Altered	435.017	25.9761	11.2669	0.402136	0.942446	1698.6	20.8	4.67784	74.2611	405.544	156.385	0.359491	4.05033
Session 2	193 nm	MCS-03_252,8_23	MCS-03_252,8	McClean South	Metamorphic muscovites	Altered	348.053	18.79	9.09529	0.266128	0.886983	1683.5	22.3	4.88898	62.6538	339.178	130.793	0.375784	3.41786
Session 2	193 nm	MCS-03_252,8_24	MCS-03_252,8	McClean South	Metamorphic muscovites	Altered	431.669	26.184	10.9016	0.389568	0.928566	1655.9	21.8	3.79592	58.3072	326.675	125.971	0.291824	3.18136
Session 2	193 nm	MCS-03_252,8_25	MCS-03_252,8	McClean South	Metamorphic muscovites	Altered	375.398	22.8773	9.7613	0.346764	0.888628	1686	24.4	4.13491	56.8704	309.519	119.356	0.317944	3.10355
Session 2	193 nm	MCS-03_252,8_26	MCS-03_252,8	McClean South	Metamorphic muscovites	Altered	491.036	32.2327	11.6671	0.499325	0.954526	1572.7	18.8	3.76112	61.8289	369.008	142.296	0.289788	3.38099
Session 2	193 nm	MCS-03_252,8_27	MCS-03_252,8	McClean South	Metamorphic muscovites	Altered	348.575	21.9589	8.75584	0.434257	0.959642	1619.1	13.6	4.69936	57.9759	330.747	127.542	0.365894	3.20371
Session 2	193 nm	MCS-03_252,8_28	MCS-03_252,8	McClean South	Metamorphic muscovites	Altered	429.212	25.0433	10.5337	0.367597	0.934323	1609	19.7	4.04835	60.0852	347.319	133.932	0.312042	3.28694
Session 2	193 nm	MCS-03_252,8_29	MCS-03_252,8	McClean South	Metamorphic muscovites	Altered	355.645	20.7249	8.68494	0.259962	0.924942	1577.4	21.8	4.47823	54.8004	318.404	122.782	0.345238	2.99837
Session 2	193 nm	MCS-03_252,8_30	MCS-03_252,8	McClean South	Metamorphic muscovites	Altered	478.255	27.5179	11.6443	0.37454	0.920259	1608.4	21.6	3.65072	59.8967	349.118	134.626	0.281495	3.27782
Session 2	193 nm	MCS-05_285,5_1	MCS-05_285,5	McClean South	Metamorphic muscovites	Altered	85.4677	2.43024	2.66509	0.0551036	0.632236	1672.16	14.98	14.4193	54.1626	242.263	93.4206	1.09305	2.91309
Session 2	193 nm	MCS-05_285,5_2	MCS-05_285,5	McClean South	Metamorphic muscovites	Altered	47.8265	1.27701	1.82325	0.0367581	0.778873	1716.78	10.78	26.5211	68.1525	249.345	96.1518	2.01043	3.66552
Session 2	193 nm	MCS-05_285,5_3	MCS-05_285,5	McClean South	Metamorphic muscovites	Preserved	41.7701	0.982793	1.71211	0.0319158	0.829807	1753.08	9.07	26.6449	64.6223	218.787	84.3679	2.01982	3.45815
Session 2	193 nm	MCS-05_285,5_4	MCS-05_285,5	McClean South	Metamorphic muscovites	Altered	164.693	4.13654	4.64073	0.103378	0.723347	1709.62	13.78	7.54213	49.3315	244.18	94.1602	0.571731	2.65325
Session 2	193 nm	MCS-05_285,5_5	MCS-05_285,5	McClean South	Metamorphic muscovites	Preserved	127.286	3.33557	3.85556	0.0883176	0.742408	1763.46	13.95	8.2262	44.7025	205.836	79.374	0.623588	2.40428
Session 2	193 nm	MCS-05_285,5_6	MCS-05_285,5	McClean South	Metamorphic muscovites	Altered	150.091	3.80664	4.34616	0.0922361	0.776125	1732.63	12.22	8.07079	49.4385	238.13	91.8269	0.611807	2.65901
Session 2	193 nm	MCS-05_285,5_7	MCS-05_285,5	McClean South	Metamorphic muscovites	Preserved	125.377	4.5628	3.79223	0.102646	0.903444	1756.26	11.12	8.08443	43.2104	199.255	76.8363	0.612841	2.32403
Session 2	193 nm	MCS-05_285,5_8	MCS-05_285,5	McClean South	Metamorphic muscovites	Altered	109.187	2.63369	3.29067	0.0529886	0.657776	1705.41	12.58	7.75863	35.9844	166.531	64.2173	0.588143	1.93539
Session 2	193 nm	MCS-05_285,5_9	MCS-05_285,5	McClean South	Metamorphic muscovites	Altered	118.113	3.52163	3.5742	0.0906932	0.626964	1738.22	18.41	9.41123	47.9277	220.903	85.1842	0.72121	2.57775
Session 2	193 nm	MCS-05_285,5_10	MCS-05_285,5	McClean South	Metamorphic muscovites	Altered	113.29	2.3691	3.44502	0.0715493	0.699373	1732.95	12.86	9.42421	45.7595	209.883	80.9345	0.714403	2.46113
Session 2	193 nm	MCS-05_285,5_11	MCS-05_285,5	McClean South	Metamorphic muscovites	Altered	103.135	4.93693	3.07869	0.0864124	0.920878	1670	13.41	4.34883	19.0179	88.1699	33.9998	0.329663	1.01493
Session 2	193 nm	MCS-05_285,5_12	MCS-05_285,5	McClean South	Metamorphic muscovites	Altered	54.5804	2.48657	1.99734	0.0705275	0.947361	1725.42	9.99	16.4595	46.3355	176.602	68.1008	1.24771	2.49211
Session 2	193 nm	MCS-05_285,5_13	MCS-05_285,5	McClean South	Metamorphic muscovites	Preserved	83.1105	2.45026	2.72975	0.0694451	0.76796	1748.36	14.26	6.34042	24.3941	103.59	39.9459	0.480636	1.31202
Session 2	193 nm	MCS-05_285,5_14	MCS-05_285,5	McClean South	Metamorphic muscovites	Altered	144.488	3.86518	4.15372	0.0977381	0.706381	1710.21	14.93	7.94522	46.5145	225.672	87.0232	0.602288	2.50174
Session 2	193 nm	MCS-05_285,5_15	MCS-05_285,5	McClean South	Metamorphic muscovites	Preserved	107.467	3.30679	3.38927	0.0926675	0.809981	1778.01	14.24	8.76758	41.8823	185.224	71.4255	0.664627	2.2526
Session 2	193 nm	MCS-05_285,5_16	MCS-05_285,5	McClean South	Metamorphic muscovites	Altered	133.273	5.48028	3.92354	0.0970489	0.805203	1728.05	17.44	9.67385	53.0596	251.256	96.8888	0.726993	2.85238
Session 2	193 nm	MCS-05_285,5_17	MCS-05_285,5	McClean South	Metamorphic muscovites	Preserved	113.82	4.08353	3.53295	0.0918855	0.731195	1770.03	17.77	8.45994	42.1258	189.29	72.9937	0.641306	2.2657
Session 2	193 nm	MCS-05_285,5_18	MCS-05_285,5	McClean South	Metamorphic muscovites	Preserved	104.014	3.4279	3.27771	0.0818807	0.708907	1764.88	17.01	8.4474	39.0246	172.725	66.6058	0.640356	2.0989
Session 2	193 nm	MCS-05_285,5_19	MCS-05_285,5	McClean South	Metamorphic muscovites	Altered	96.6911	2.80156	3.05438	0.070499	0.726894	1742.05	14.53	7.5717	32.5958	143.92	55.4981	0.573973	1.75313
Session 2	193 nm	MCS-05_285,5_20	MCS-05_285,5	McClean South	Metamorphic muscovites	Preserved	94.0378	2.95715	3.06754	0.065386	0.854714	1787.26	11.18	8.24975	35.6678	152.505	58.8087	0.625373	1.91836
Session 2	193 nm	MCS-05_285,5_21	MCS-05_285,5	McClean South	Metamorphic muscovites	Preserved	118.222	3.16197	3.6033	0.071881	0.650636	1750.9	15.13	10.6962	54.322	248.583	95.8577	0.810829	2.92166
Session 2	193 nm	MCS-05_285,5_22	MCS-05_285,5	McClean South	Metamorphic muscovites	Preserved	102.421	3.01445	3.23526	0.0718335	0.772954	1763.43	13.36	9.72583	44.3486	195.821	75.5119	0.737267	2.38525
Session 2	193 nm	MCS-05_285,5_23	MCS-05_285,5	McClean South	Metamorphic muscovites	Preserved	101.556	2.95168	3.2055	0.0749717	0.823798	1758.99	11.95	7.62257	34.4383	152.178	58.6823	0.577829	1.85223
Session 2	193 nm	MCS-05_285,5_24	MCS-05_285,5	McClean South	Metamorphic muscovites	Preserved	90.9191	2.55767	2.97052	0.0675432	0.806102	1776.53	12.16	8.40156	35.1752	150.161	57.9046	0.636881	1.89187
Session 2	193 nm	MCS-05_285,5_25	MCS-05_285,5	McClean South	Metamorphic muscovites	Preserved	83.6695	3.0996	2.76927	0.0769628	0.879824	1764.54	11.91	9.79069	38.214	161.036	62.0981	0.742184	2.0553
Session 2	193 nm	MCS-05_285,5_26	MCS-05_285,5	McClean South	Metamorphic muscovites	Altered	110.199	3.13742	3.20216	0.0994231	0.300313	1647.98	26.51	5.19852	23.6844	113.897	43.9205	0.398557	1.27624
Session 2	193 nm	MCS-05_285,5_27	MCS-05_285,5	McClean South	Metamorphic muscovites	Altered	79.7157	2.4176	2.47483	0.0591269	0.719417	1636.67	14.12	6.7117	23.4111	105.176	40.5578	0.508781	1.25914
Session 2	193 nm	MCS-05_285,5_28	MCS-05_285,5	McClean South	Metamorphic muscovites	Altered	103.092	2.84835	3.03448	0.0763535	0.765027	1646.83	13.36	4.23597	18.1168	85.846	33.1037	0.321108	0.974396
Session 2	193 nm	MCS-05_285,5_29	MCS-05_285,5	McClean South	Metamorphic muscovites	Preserved	51.762	16.2506	2.03725	0.34633	0.992156	1821.42	38.32	8.28279	23.7829	84.281	32.5002	0.627877	1.27914
Session 2	193 nm	MCS-05_285,5_30	MCS-05_285,5	McClean South	Metamorphic muscovites	Altered	145.786	4.09281	4.14204	0.0936654	0.687782	1692.81	15.31	8.0323	46.8919	230.196	88.7674	0.608889	2.52204
Session 2	193 nm	MCS-31_205,3_1	MCS-31_205,3	McClean South	Metamorphic muscovites	Altered	141.107	19.1918	3.98003	0.457831	0.992669	1645.91	11.43	8.54146	47.9001	238.591	92.0049	0.65202	2.59506
Session 2	193 nm	MCS-31_205,3_2	MCS-31_205,3	McClean South	Metamorphic muscovites	Altered	497.772	42.8058	12.314	0.8179	0.980246	1650.79	16.89	3.57754	62.0728	352.523	135.939	0.273095	3.36289
Session 2	193 nm	MCS-31_205,3_4	MCS-31_205,3	McClean South	Metamorphic muscovites	Altered	184.443	10.8094	5.07473	0.26526	0.970027	1674.14	10.51	7.61904	54.4792	278.186	107.273	0.581606	2.9515
Session 2	193 nm	MCS-31_205,3_6	MCS-31_205,3	McClean South	Metamorphic muscovites	Altered	464.336	23.1016	11.3892	0.46103	0.91724	1630.32	15.13	3.4934	56.0605	321.109	123.825	0.266672	3.03717
Session 2	193 nm	MCS-31_205,3_7	MCS-31_205,3	McClean South	Metamorphic muscovites	Altered	321.871	18.8397	8.39436	0.352833	0.920165	1687.49	18.49	4.53437	53.6318	288.916	111.411	0.346136	2.90559
Session 2	193 nm	MCS-31_205,3_8	MCS-31_205,3	McClean South	Metamorphic muscovites	Altered	214.581	13.8206	5.82396	0.384564	0.927355	1684.42	20.94	6.87027	56.378	291.835	112.537	0.524449	3.05437
Session 2	193 nm	MCS-31_205,3_9	MCS-31_205,3	McClean South	Metamorphic muscovites	Altered	267.317	17.5716	7.1129	0.443198	0.926514	1692.2	19.64	5.71751	57.3021	302.556	116.671	0.436451	3.10444
Session 2	193 nm	MCS-31_205,3_10	MCS-31_205,3	McClean South	Metamorphic muscovites	Altered	256.227	23.0502	6.70394	0.509679	0.980135	1657.12	13.3	3.04495	28.7626	154.446	59.5572	0.232439	1.55826
Session 2	193 nm	MCS-31_205,3_12	MCS-31_205,3	McClean South	Metamorphic muscovites	Altered	55.6334	5.38817	1.9928	0.150766	0.968159	1646.85	17.55	16.6892	46.8613	183.799	70.8759	1.27398	2.53879
Session 2	193 nm	MCS-31_205,3_14	MCS-31_205,3	McClean South	Metamorphic muscovites	Altered	122.496	12.1358	3.53207	0.276487	0.982895	1639.02	11.88	11.3658	56.5648	275.61	106.28	0.867619	3.06449
Session 2	193 nm	MCS-31_205,3_16	MCS-31_205,3	McClean South	Metamorphic muscovites	Altered	330.292	13.8387	8.1348	0.251627	0.878053	1598.09	14.69	4.49901	51.5681	294.162	113.434	0.343436	2.79378
Session 2	193 nm	MCS-31_205,3_17	MCS-31_205,3	McClean South	Metamorphic muscovites	Altered	295.342	11.6229	7.30521	0.192028	0.757834	1589.38	18.33	4.31338	44.3984	252.183	97.246	0.329266	2.40536
Session 2	193 nm	MCS-31_205,3_18	MCS-31_205,3	McClean South	Metamorphic muscovites	Altered	267.5	12.0028	6.91266	0.193477	0.887858	1644.11	16.38	5.89489	57.4167	312.157	120.373	0.449992	3.11064
Session 2	193 nm	MCS-31_205,3_19	MCS-31_205,3	McClean South	Metamorphic muscovites	Altered	282.792	12.4486	7.19798	0.186515	0.877176	1628.45	17.01	5.56066	56.3968	311.29	120.039	0.424478	3.05539
Session 2	193 nm	MCS-31_205,3_20	MCS-31_205,3	McClean South	Metamorphic muscovites	Altered	370.753	15.5113	9.41116	0.231955	0.907446	1661.42	15.89	5.09966	67.6241	374.281	144.329	0.389287	3.66364
Session 2	193 nm	MCS-31_205,3_21	MCS-31_205,3	McClean South	Metamorphic muscovites	Altered	250.505	12.7114	6.78335	0.283024	0.966174	1710.32	10.03	7.55114	72.9766	378.626	146.005	0.582843	3.95363
Session 2	193 nm	MCS-31_205,3-26	MCS-31_205,3	McClean South	Metamorphic muscovites	Altered	215.757	11.5019	5.59764	0.176765	0.945657	1612.04	15.79	7.82521	61.7189	334.221	128.881	0.597344	3.34372
Session 2	193 nm	MCS-31_205,3_27	MCS-31_205,3	McClean South	Metamorphic muscovites	Altered	291.707	13.0134	7.36979	0.180464	0.875907	1621.19	17.94	6.79842	70.5961	392.579	151.385	0.518964	3.82466
Session 2	193 nm	MCS-31_205,3_28	MCS-31_205,3	McClean South	Metamorphic muscovites	Altered	328.243	12.6999	8.47637	0.198495	0.838012	1673.82	16.83	7.2462	86.5441	470.846	181.566	0.553146	4.68867
Session 2	193 nm	MCS-31_205,3_29	MCS-31_205,3	McClean South	Metamorphic muscovites	Altered	630.851	30.5771	15.1694	0.595098	0.945226	1624.36	12.66	3.79674	81.1518	474.145	182.838	0.289828	4.39653
Session 2	193 nm	MCS-31_205,3_30	MCS-31_205,3	McClean South	Metamorphic muscovites	Altered	445.066	19.0488	11.2087	0.412132	0.864175	1669.12	16.74	4.7111	74.4039	412.478	159.059	0.357383	4.00581
Session 2	193 nm	MCS-06_281,8_2	MCS-06_281,8	McClean South	Metamorphic muscovites	Altered	232.735	15.1678	6.11093	0.270349	0.959031	1648.4	16.2	5.75385	49.5318	263.809	101.729	0.437104	2.67111
Session 2	193 nm	MCS-06_281,8_3	MCS-06_281,8	McClean South	Metamorphic muscovites	Altered	271.422	11.1779	6.91325	0.172041	0.869075	1625.4	15.9	4.33631	42.6578	234.214	90.3169	0.332754	2.30041
Session 2	193 nm	MCS-06_281,8_4	MCS-06_281,8	McClean South	Metamorphic muscovites	Altered	358.659	17.1604	8.91057	0.298308	0.915292	1624.2	15.4	3.56751	45.333	255.177	98.4007	0.274358	2.44468
Session 2	193 nm	MCS-06_281,8_5	MCS-06_281,8	McClean South	Metamorphic muscovites	Altered	517.197	41.2515	13.1711	0.921997	0.977813	1703.7	13.7	2.82506	53.7327	295.07	113.784	0.220001	2.89765
Session 2	193 nm	MCS-06_281,8_6	MCS-06_281,8	McClean South	Metamorphic muscovites	Altered	368.981	29.8651	9.80678	0.648311	0.972936	1739.9	16	4.02562	55.6131	292.621	112.84	0.305815	2.99906
Session 2	193 nm	MCS-06_281,8_7	MCS-06_281,8	McClean South	Metamorphic muscovites	Altered	463.158	23.5646	11.9276	0.48441	0.968173	1712	11.2	3.14424	52.8308	286.889	110.629	0.238859	2.84902
Session 2	193 nm	MCS-06_281,8_8	MCS-06_281,8	McClean South	Metamorphic muscovites	Altered	321.242	21.1553	8.71775	0.48814	0.959172	1757	14.9	4.67152	56.8623	292.997	112.985	0.351713	3.06614
Session 2	193 nm	MCS-06_281,8_9	MCS-06_281,8	McClean South	Metamorphic muscovites	Altered	271.533	28.8741	6.87563	0.685366	0.959617	1616.1	22.4	4.76254	46.1286	254.76	98.24	0.361797	2.48758
Session 2	193 nm	MCS-06_281,8_10	MCS-06_281,8	McClean South	Metamorphic muscovites	Altered	403.995	17.7326	10.0699	0.345494	0.875765	1643.4	16.1	3.11492	44.1867	247.909	95.5978	0.236631	2.38286
Session 2	193 nm	MCS-06_281,8_11	MCS-06_281,8	McClean South	Metamorphic muscovites	Altered	272.628	12.0355	6.68641	0.274144	0.878079	1566.5	15.5	4.56968	43.0424	245.428	94.6414	0.347145	2.32116
Session 2	193 nm	MCS-06_281,8_12	MCS-06_281,8	McClean South	Metamorphic muscovites	Altered	38.3024	2.15378	1.66845	0.0689825	0.915646	1738.8	15.2	28.4402	66.8445	214.599	82.7532	2.16052	3.60473
Session 2	193 nm	MCS-06_281,8_13	MCS-06_281,8	McClean South	Metamorphic muscovites	Altered	92.6517	3.88	2.86332	0.0878495	0.89613	1657.7	11.7	16.6187	67.0326	303.334	116.971	1.26248	3.61488
Session 2	193 nm	MCS-06_281,8_14	MCS-06_281,8	McClean South	Metamorphic muscovites	Altered	20.1805	0.936472	1.18175	0.0228191	0.455541	1681.1	16.5	48.4842	80.7132	195.845	75.5212	3.74228	4.42245
Session 2	193 nm	MCS-06_281,8_15	MCS-06_281,8	McClean South	Metamorphic muscovites	Altered	326.208	14.7012	8.28232	0.305136	0.873782	1647.2	16.4	6.18479	72.1598	397.456	153.266	0.469841	3.89137
Session 2	193 nm	MCS-06_281,8_16	MCS-06_281,8	McClean South	Metamorphic muscovites	Altered	250.919	11.2442	6.54246	0.180885	0.898745	1650.4	15.9	7.20882	67.7298	363.264	140.081	0.558272	3.65247
Session 2	193 nm	MCS-06_281,8_17	MCS-06_281,8	McClean South	Metamorphic muscovites	Altered	435.937	21.9602	10.7288	0.451887	0.937519	1630.9	13.3	4.74469	72.4071	407.475	157.13	0.360441	3.8671
Session 2	193 nm	MCS-06_281,8_18	MCS-06_281,8	McClean South	Metamorphic muscovites	Altered	543.692	22.7306	13.2963	0.414546	0.819136	1641.2	18.5	3.87418	72.5655	414.956	160.014	0.294311	3.91325
Session 2	193 nm	MCS-06_281,8_19	MCS-06_281,8	McClean South	Metamorphic muscovites	Altered	440.52	18.6037	10.8832	0.321129	0.904415	1638.2	14.6	4.81764	73.8602	418.09	161.223	0.365983	3.98307
Session 2	193 nm	MCS-06_281,8_20	MCS-06_281,8	McClean South	Metamorphic muscovites	Altered	158.409	7.60518	4.26215	0.176947	0.717012	1604.9	24.5	10.5737	64.4368	334.917	129.15	0.815292	3.4749
Session 2	193 nm	MCS-06_281,8_21	MCS-06_281,8	McClean South	Metamorphic muscovites	Altered	281.582	9.68923	7.51611	0.210248	0.920847	1708.5	10.3	8.01464	84.8585	444.588	171.441	0.60885	4.57618
Session 2	193 nm	MCS-06_281,8_22	MCS-06_281,8	McClean South	Metamorphic muscovites	Altered	503.433	23.3406	13.0506	0.371633	0.906094	1731.4	18.5	5.58547	102.685	553.95	213.613	0.424312	5.53751
Session 2	193 nm	MCS-06_281,8_23	MCS-06_281,8	McClean South	Metamorphic muscovites	Altered	241.665	13.1232	6.34685	0.237919	0.962367	1655.6	13.1	7.93854	70.9769	377.941	145.74	0.603068	3.82758
Session 2	193 nm	MCS-06_281,8_24	MCS-06_281,8	McClean South	Metamorphic muscovites	Altered	365	13.7767	9.18704	0.236308	0.862011	1647.5	14.8	5.46289	70.6995	392.812	151.475	0.415	3.81262
Session 2	193 nm	MCS-06_281,8_25	MCS-06_281,8	McClean South	Metamorphic muscovites	Altered	308.346	10.6033	8.03925	0.244545	0.877094	1682.9	12.8	6.91275	78.2862	419.913	161.926	0.525142	4.22175
Session 2	193 nm	MCS-06_281,8_26	MCS-06_281,8	McClean South	Metamorphic muscovites	Altered	354.032	18.4202	8.97917	0.358823	0.845882	1656.1	21	3.93996	49.8364	274.792	105.964	0.299308	2.68753
Session 2	193 nm	MCS-06_281,8_27	MCS-06_281,8	McClean South	Metamorphic muscovites	Altered	674.135	33.8411	16.2754	0.687574	0.945913	1636.5	12.9	3.13595	71.8982	416.472	160.599	0.238229	3.87727
Session 2	193 nm	MCS-06_281,8_29	MCS-06_281,8	McClean South	Metamorphic muscovites	Altered	88.5611	3.50293	2.57977	0.0765433	0.672192	1546.5	18.4	19.2286	68.8525	328.52	126.683	1.43046	3.69025
Session 2	193 nm	MCS-06_281,8_30	MCS-06_281,8	McClean South	Metamorphic muscovites	Altered	86.1426	2.93417	2.68454	0.0797315	0.550358	1641.9	21.4	28.4529	107.601	482.851	186.196	2.16148	5.80259
Session 3	193 nm	WC-449_452,8_1	WC-449_452,8	Cigar Lake	Eearly hydrothermal muscovites	Altered	140.267	6.30076	4.02684	0.0895413	0.840988	1636.44	17.17	6.77912	38.4919	192.466	74.2182	0.52912	2.13068
Session 3	193 nm	WC-449_452,8_2	WC-449_452,8	Cigar Lake	Eearly hydrothermal muscovites	Altered	111.113	5.42478	3.39635	0.109366	0.795536	1657.57	18.68	9.9424	47.6141	223.605	86.2258	0.776019	2.63563
Session 3	193 nm	WC-449_452,8_3	WC-449_452,8	Cigar Lake	Eearly hydrothermal muscovites	Altered	138.704	5.77656	4.01953	0.101441	0.855633	1648.14	14.39	8.99647	50.9893	252.572	97.3962	0.702188	2.82247
Session 3	193 nm	WC-449_452,8_4	WC-449_452,8	Cigar Lake	Eearly hydrothermal muscovites	Altered	168.451	6.67666	4.6716	0.0821505	0.740455	1634	18.75	7.66696	50.5035	261.409	100.804	0.598418	2.79557
Session 3	193 nm	WC-449_452,8_5	WC-449_452,8	Cigar Lake	Eearly hydrothermal muscovites	Altered	89.1494	3.5861	2.8575	0.0556922	0.811481	1643.78	14.25	13.1352	52.9244	237.018	91.3981	1.02522	2.92958
Session 3	193 nm	WC-449_452,8_6	WC-449_452,8	Cigar Lake	Eearly hydrothermal muscovites	Altered	216.486	8.99527	5.93055	0.181189	0.88567	1675.82	13.86	6.70255	56.0489	293.693	113.253	0.523144	3.10253
Session 3	193 nm	WC-449_452,8_7	WC-449_452,8	Cigar Lake	Eearly hydrothermal muscovites	Altered	94.0882	3.56035	2.89189	0.0550624	0.746926	1599.83	14.7	12.0669	49.205	229.803	88.6159	0.941839	2.72369
Session 3	193 nm	WC-449_452,8_8	WC-449_452,8	Cigar Lake	Eearly hydrothermal muscovites	Altered	151.436	6.43855	4.24147	0.112044	0.782916	1619.95	17.33	6.84826	40.957	209.91	80.9451	0.534517	2.26714
Session 3	193 nm	WC-449_452,8_9	WC-449_452,8	Cigar Lake	Eearly hydrothermal muscovites	Altered	231.484	10.2932	6.22113	0.175039	0.832066	1658.76	17.97	5.14715	45.1511	241.164	92.9968	0.401743	2.49929
Session 3	193 nm	WC-449_452,8_10	WC-449_452,8	Cigar Lake	Eearly hydrothermal muscovites	Altered	182.897	7.61525	4.99191	0.116567	0.808093	1629.71	17.16	6.8226	48.0229	252.57	97.3952	0.532514	2.65826
Session 3	193 nm	WC-449_452,8_11	WC-449_452,8	Cigar Lake	Eearly hydrothermal muscovites	Altered	210.627	9.9488	5.66842	0.176414	0.893368	1640.54	15.42	6.95656	55.6018	296.574	114.364	0.54297	3.07778
Session 3	193 nm	WC-449_452,8_12	WC-449_452,8	Cigar Lake	Eearly hydrothermal muscovites	Altered	133.636	5.53908	3.82527	0.100528	0.745325	1616.31	17.67	6.71187	36.2024	181.548	70.0079	0.523871	2.00395
Session 3	193 nm	WC-449_452,8_13	WC-449_452,8	Cigar Lake	Eearly hydrothermal muscovites	Altered	126.37	5.0563	3.685	0.0967218	0.887512	1627.52	11.79	9.61109	49.9392	247.696	95.5159	0.755841	2.78527
Session 3	193 nm	WC-449_452,8_14	WC-449_452,8	Cigar Lake	Eearly hydrothermal muscovites	Altered	176.057	7.49844	4.92324	0.1291	0.848483	1659.32	15.86	6.93006	48.1083	246.953	95.2294	0.540902	2.66299
Session 3	193 nm	WC-449_452,8_15	WC-449_452,8	Cigar Lake	Eearly hydrothermal muscovites	Altered	115.117	5.32172	3.49025	0.0745557	0.813076	1657.61	18.17	12.8782	63.3786	300.067	115.711	1.00516	3.50826
Session 3	193 nm	WC-449_452,8_16	WC-449_452,8	Cigar Lake	Eearly hydrothermal muscovites	Altered	149.122	6.24993	4.19872	0.0881845	0.630185	1623.86	21.3	6.0922	36.0681	183.882	70.9082	0.475505	1.99651
Session 3	193 nm	WC-449_452,8_17	WC-449_452,8	Cigar Lake	Eearly hydrothermal muscovites	Altered	93.0585	3.70033	2.91511	0.0487077	0.645168	1625.47	17.98	12.2235	50.2438	230.237	88.7836	0.954062	2.7812
Session 3	193 nm	WC-449_452,8_18	WC-449_452,8	Cigar Lake	Eearly hydrothermal muscovites	Altered	166.588	6.64856	4.69112	0.109069	0.784544	1655.82	16.99	8.68548	57.4516	292.862	112.933	0.677914	3.18018
Session 3	193 nm	WC-449_452,8_19	WC-449_452,8	Cigar Lake	Eearly hydrothermal muscovites	Altered	108.233	4.10244	3.31027	0.0709414	0.832541	1648.41	13.2	8.86822	41.661	196.337	75.7111	0.69952	2.3156
Session 3	193 nm	WC-449_452,8_20	WC-449_452,8	Cigar Lake	Eearly hydrothermal muscovites	Altered	109.304	4.43194	3.22781	0.0689056	0.74699	1595.9	16.3	7.9191	36.0425	175.201	67.5606	0.618097	1.9951
Session 3	193 nm	WC-449_452,8_21	WC-449_452,8	Cigar Lake	Eearly hydrothermal muscovites	Altered	1370.92	93.4446	32.7751	1.90093	0.961672	1650.69	15.66	0.982672	45.4135	272.674	105.148	0.076699	2.51382
Session 3	193 nm	WC-449_452,8_22	WC-449_452,8	Cigar Lake	Eearly hydrothermal muscovites	Altered	221.856	10.5668	5.86305	0.200857	0.893169	1622.55	15.06	4.3305	35.8009	194.462	74.9879	0.338002	1.98172
Session 3	193 nm	WC-449_452,8_23	WC-449_452,8	Cigar Lake	Eearly hydrothermal muscovites	Altered	229.719	11.7812	6.08121	0.215208	0.821738	1632.61	20.59	4.59819	39.4284	213.8	82.4449	0.358895	2.18252
Session 3	193 nm	WC-449_452,8_24	WC-449_452,8	Cigar Lake	Eearly hydrothermal muscovites	Altered	201.394	10.7037	5.31838	0.239788	0.900458	1600.1	15.99	5.19508	38.9587	211.769	81.6619	0.405484	2.15652
Session 3	193 nm	WC-449_452,8_25	WC-449_452,8	Cigar Lake	Eearly hydrothermal muscovites	Altered	1623.37	160.707	38.1563	2.85031	0.982593	1629.2	22.03	0.646642	35.4487	212.474	81.9338	0.0504714	1.9258
Session 3	193 nm	WC-449_452,8_26	WC-449_452,8	Cigar Lake	Eearly hydrothermal muscovites	Altered	242.392	11.4491	6.30193	0.21187	0.908674	1614.45	14.18	4.13767	36.7673	203.002	78.2809	0.322951	2.03522
Session 3	193 nm	WC-449_452,8_27	WC-449_452,8	Cigar Lake	Eearly hydrothermal muscovites	Altered	302.555	14.4259	7.91597	0.31754	0.903268	1664.67	15.18	3.65402	40.7856	225.698	87.033	0.28766	2.27711
Session 3	193 nm	WC-449_452,8_28	WC-449_452,8	Cigar Lake	Eearly hydrothermal muscovites	Altered	47.5804	1.84892	1.86011	0.0333004	0.655155	1616.6	13.92	23.3152	61.1518	224.539	86.5862	1.81979	3.385
Session 3	193 nm	WC-449_452,8_29	WC-449_452,8	Cigar Lake	Eearly hydrothermal muscovites	Altered	50.8242	2.23539	1.90753	0.0448521	0.70357	1594.55	15.3	9.16392	24.6482	94.2707	36.3524	0.715258	1.36438
Session 3	193 nm	WC-449_452,8_30	WC-449_452,8	Cigar Lake	Eearly hydrothermal muscovites	Altered	182.944	9.00051	5.02569	0.233745	0.881202	1640.26	17.83	2.91827	20.6801	109.329	42.159	0.230448	1.15816
Session 3	193 nm	WC-449_452,8_31	WC-449_452,8	Cigar Lake	Eearly hydrothermal muscovites	Altered	318.138	14.132	7.85959	0.17288	0.865332	1580.57	18.62	5.2431	58.5971	337.621	130.192	0.409232	3.2164
Session 3	193 nm	WC-449_452,8_32	WC-449_452,8	Cigar Lake	Eearly hydrothermal muscovites	Altered	358.909	15.3982	8.98769	0.260317	0.786465	1619.37	19.44	5.45118	69.0828	396.004	152.706	0.425472	3.82401
Session 3	193 nm	WC-449_452,8_33	WC-449_452,8	Cigar Lake	Eearly hydrothermal muscovites	Altered	445.476	20.6406	10.7127	0.322751	0.87062	1582	17.55	2.84728	43.0093	256.732	99.0001	0.222235	2.38074
Session 3	193 nm	WC-449_452,8_34	WC-449_452,8	Cigar Lake	Eearly hydrothermal muscovites	Altered	379.78	18.3343	9.23987	0.314942	0.902218	1581.22	15.65	3.77942	49.2406	290.524	112.031	0.294989	2.72566
Session 3	193 nm	WC-449_452,8_35	WC-449_452,8	Cigar Lake	Eearly hydrothermal muscovites	Altered	456.834	33.1613	10.3816	0.913801	0.9842	1498.49	18.25	3.47213	54.3821	341.626	131.737	0.288369	2.99373
Session 3	193 nm	WC-449_452,8_36	WC-449_452,8	Cigar Lake	Eearly hydrothermal muscovites	Altered	466.611	22.6872	11.6465	0.425509	0.862384	1646.52	18.79	4.12878	68.5161	394.043	151.95	0.325646	3.79264
Session 3	193 nm	WC-449_452,8_38	WC-449_452,8	Cigar Lake	Eearly hydrothermal muscovites	Altered	508.345	24.8476	12.5369	0.446646	0.888864	1636.09	17.48	2.58071	46.0393	267.972	103.334	0.203276	2.54846
Session 3	193 nm	WC-449_452,8_39	WC-449_452,8	Cigar Lake	Eearly hydrothermal muscovites	Altered	431.331	27.198	11.1626	0.635792	0.913728	1697.19	20.14	3.16535	49.822	276.348	106.565	0.24706	2.75785
Session 3	193 nm	WC-449_452,8_40	WC-449_452,8	Cigar Lake	Eearly hydrothermal muscovites	Altered	347.335	17.6353	8.72321	0.292309	0.955866	1619.44	13.86	4.63003	56.9498	325.504	125.52	0.361381	3.1524
Session 3	193 nm	WC-473_433,5_1	WC-473_433,5	Cigar Lake	Metamorphic muscovites	Altered	123.195	7.24768	3.59664	0.0886374	0.85193	1804.6	29.5	10.5658	53.5359	280.954	108.341	0.879424	3.16298
Session 3	193 nm	WC-473_433,5_2	WC-473_433,5	Cigar Lake	Metamorphic muscovites	Altered	94.1545	5.21614	2.96265	0.0544341	0.734006	1871.7	32.7	14.0268	58.5444	285.063	109.925	1.1675	3.45889
Session 3	193 nm	WC-473_433,5_3	WC-473_433,5	Cigar Lake	Metamorphic muscovites	Altered	92.4582	5.88654	2.91528	0.0788912	0.818611	1870.2	32.3	15.2639	62.6894	304.617	117.466	1.27047	3.70378
Session 3	193 nm	WC-473_433,5_4	WC-473_433,5	Cigar Lake	Metamorphic muscovites	Preserved	115.034	6.57014	3.57699	0.0883254	0.743706	1903.8	33.1	15.1027	76.1063	374.993	144.604	1.25705	4.49647
Session 3	193 nm	WC-473_433,5_5	WC-473_433,5	Cigar Lake	Metamorphic muscovites	Preserved	103.181	5.90354	3.27268	0.0768305	0.790069	1912.6	31.7	15.0322	69.4317	335.01	129.186	1.25202	4.09747
Session 3	193 nm	WC-473_433,5_6	WC-473_433,5	Cigar Lake	Metamorphic muscovites	Altered	202.258	11.881	5.6842	0.164956	0.845509	1826.4	30	7.49647	60.0307	329.76	127.161	0.628707	3.5737
Session 3	193 nm	WC-473_433,5_7	WC-473_433,5	Cigar Lake	Metamorphic muscovites	Preserved	142.623	8.22722	4.28887	0.0884696	0.796086	1890	34.6	9.68632	59.015	300.679	115.947	0.812962	3.48669
Session 3	193 nm	WC-473_433,5_8	WC-473_433,5	Cigar Lake	Metamorphic muscovites	Altered	129.729	7.69385	3.80253	0.108629	0.825825	1823.1	29.6	10.9171	58.4824	305.693	117.88	0.908664	3.45522
Session 3	193 nm	WC-473_433,5_9	WC-473_433,5	Cigar Lake	Metamorphic muscovites	Altered	92.4036	5.40455	2.90649	0.0570998	0.598878	1865.5	37.3	13.4194	54.9477	267.648	103.21	1.11695	3.24639
Session 3	193 nm	WC-473_433,5_10	WC-473_433,5	Cigar Lake	Metamorphic muscovites	Altered	92.6113	5.36784	2.92965	0.0626226	0.688203	1876.7	34.6	14.3267	59.1303	286.386	110.436	1.19246	3.4935
Session 3	193 nm	WC-473_433,5_11	WC-473_433,5	Cigar Lake	Metamorphic muscovites	Altered	102.036	5.9576	3.07231	0.0728237	0.697296	1813.9	33.4	12.152	52.5966	267.634	103.204	1.01145	3.10748
Session 3	193 nm	WC-473_433,5_12	WC-473_433,5	Cigar Lake	Metamorphic muscovites	Altered	79.105	4.88729	2.43509	0.0537794	0.67367	1778.8	34.4	12.4491	42.7073	212.562	81.9675	1.03619	2.52321
Session 3	193 nm	WC-473_433,5_13	WC-473_433,5	Cigar Lake	Metamorphic muscovites	Altered	108.028	6.93766	3.21533	0.101628	0.817563	1807.9	30.8	6.33032	28.6746	147.605	56.9192	0.526894	1.69414
Session 3	193 nm	WC-473_433,5_14	WC-473_433,5	Cigar Lake	Metamorphic muscovites	Preserved	98.0618	5.63589	3.22037	0.0636714	0.826964	1964.5	33.1	9.08363	41.2109	192.265	74.1408	0.756062	2.4348
Session 3	193 nm	WC-473_433,5_15	WC-473_433,5	Cigar Lake	Metamorphic muscovites	Altered	130.942	7.58945	3.72719	0.0939211	0.67438	1773	34	6.29218	33.0392	177.837	68.577	0.52372	1.952
Session 3	193 nm	WC-473_433,5_16	WC-473_433,5	Cigar Lake	Metamorphic muscovites	Altered	120.206	7.15851	3.65645	0.0804183	0.658108	1873.5	37.9	8.60354	44.3183	223.226	86.0799	0.716103	2.61839
Session 3	193 nm	WC-473_433,5_17	WC-473_433,5	Cigar Lake	Metamorphic muscovites	Altered	94.931	5.22725	2.89767	0.0537075	0.596719	1818.7	34.4	8.57977	35.0244	176.709	68.1422	0.717807	2.07997
Session 3	193 nm	WC-473_433,5_18	WC-473_433,5	Cigar Lake	Metamorphic muscovites	Preserved	187.909	11.4061	5.35151	0.165689	0.869248	1839.4	29.4	6.27729	47.3255	254.601	98.1786	0.522481	2.79606
Session 3	193 nm	WC-473_433,5_19	WC-473_433,5	Cigar Lake	Metamorphic muscovites	Preserved	121.884	8.2677	3.71116	0.118861	0.691157	1878.6	40.5	11.877	62.0959	312.46	120.49	0.988563	3.66871
Session 3	193 nm	WC-473_433,5_20	WC-473_433,5	Cigar Lake	Metamorphic muscovites	Preserved	150.325	8.67093	4.44932	0.101645	0.728385	1871	35.4	10.2804	64.4393	333.567	128.629	0.855674	3.80717
Session 3	193 nm	WC-473_433,5_21	WC-473_433,5	Cigar Lake	Metamorphic muscovites	Preserved	283.177	19.2486	7.87827	0.291064	0.862609	1850.2	33.9	5.58511	61.9883	341.374	131.64	0.464868	3.66236
Session 3	193 nm	WC-473_433,5_22	WC-473_433,5	Cigar Lake	Metamorphic muscovites	Altered	163.065	10.5018	4.45297	0.172107	0.847537	1742.1	28.1	7.18703	45.0864	252.959	97.5455	0.598201	2.66377
Session 3	193 nm	WC-473_433,5_23	WC-473_433,5	Cigar Lake	Metamorphic muscovites	Preserved	86.2646	5.83858	2.82288	0.0918639	0.730797	1918.2	37.2	13.2652	52.7537	246.995	95.2454	1.10411	3.11676
Session 3	193 nm	WC-473_433,5_24	WC-473_433,5	Cigar Lake	Metamorphic muscovites	Preserved	87.8821	5.15768	2.87823	0.0651337	0.41831	1925.7	42.2	13.0545	52.9336	247.628	95.4898	1.08657	3.1274
Session 3	193 nm	WC-473_433,5_25	WC-473_433,5	Cigar Lake	Metamorphic muscovites	Preserved	121.507	7.61439	3.70419	0.0990107	0.857302	1880.1	32.1	10.7457	56.076	281.825	108.676	0.894406	3.31305
Session 3	193 nm	WC-473_433,5_26	WC-473_433,5	Cigar Lake	Metamorphic muscovites	Preserved	111.816	6.4223	3.46283	0.0731759	0.640406	1889	36.9	11.6358	56.7642	280.828	108.292	0.968489	3.35371
Session 3	193 nm	WC-473_433,5_28	WC-473_433,5	Cigar Lake	Metamorphic muscovites	Preserved	131.482	7.57959	4.07419	0.0778471	0.641105	1928.9	39.3	9.45767	54.284	268.405	103.502	0.787195	3.20718
Session 3	193 nm	WC-473_433,5_29	WC-473_433,5	Cigar Lake	Metamorphic muscovites	Preserved	141.189	7.92947	4.27326	0.0710094	0.666035	1899.9	38.2	9.95252	59.9155	303.301	116.958	0.828383	3.53989
Session 3	193 nm	WC-473_433,5_30	WC-473_433,5	Cigar Lake	Metamorphic muscovites	Preserved	129.165	7.4428	4.00744	0.0931598	0.830859	1927.3	32.3	10.7341	61.1328	301.889	116.413	0.901277	3.61182
Session 3	193 nm	WC-473_433,5_31	WC-473_433,5	Cigar Lake	Metamorphic muscovites	Preserved	151.589	8.46341	4.62858	0.115936	0.754118	1931	33.5	8.33304	54.3373	274.051	105.679	0.69714	3.22676
Session 3	193 nm	WC-473_433,5_32	WC-473_433,5	Cigar Lake	Metamorphic muscovites	Preserved	100.996	5.89695	3.18481	0.0715769	0.865024	1895.7	30.2	11.0418	49.5416	240.705	92.8199	0.919046	2.92699
Session 3	193 nm	WC-473_433,5_33	WC-473_433,5	Cigar Lake	Metamorphic muscovites	Altered	104.402	6.13743	3.19716	0.0609746	0.825116	1850.6	33.1	10.0098	45.6921	227.274	87.6408	0.839457	2.68388
Session 3	193 nm	WC-473_433,5_34	WC-473_433,5	Cigar Lake	Metamorphic muscovites	Preserved	114.849	6.55696	3.55551	0.0690301	0.698323	1895.1	36	10.5939	53.0646	262.618	101.27	0.881768	3.13514
Session 3	193 nm	WC-473_433,5_35	WC-473_433,5	Cigar Lake	Metamorphic muscovites	Altered	149.422	8.53034	4.35733	0.0960356	0.810759	1842.6	32.4	8.78868	53.9499	283.452	109.304	0.731512	3.18744
Session 3	193 nm	WC-473_433,5_36	WC-473_433,5	Cigar Lake	Metamorphic muscovites	Altered	127.916	7.24426	3.84587	0.0729818	0.791808	1866.3	33.7	9.92762	53.7881	274.102	105.699	0.82631	3.17788
Session 3	193 nm	WC-473_433,5_37	WC-473_433,5	Cigar Lake	Metamorphic muscovites	Altered	116.474	6.48294	3.54636	0.0693605	0.715361	1867.7	34.1	11.6447	58.178	292.753	112.89	0.969231	3.43724
Session 3	193 nm	WC-473_433,5_38	WC-473_433,5	Cigar Lake	Metamorphic muscovites	Preserved	148.075	8.67175	4.49643	0.12981	0.822674	1915.9	31.1	9.60987	60.874	307.144	118.44	0.799862	3.59652
Session 3	193 nm	WF-66_588,2_1	WF-66_588,2	Waterfound	Eearly hydrothermal muscovites	Altered	252.931	15.195	6.4781	0.192538	0.874941	1558.98	22.68	5.32952	48.6395	249.281	96.1272	0.380053	2.46202
Session 3	193 nm	WF-66_588,2_2	WF-66_588,2	Waterfound	Eearly hydrothermal muscovites	Altered	271.325	15.7982	6.97006	0.188089	0.883604	1578.45	23.06	5.09188	49.9998	255.487	98.5201	0.363107	2.53088
Session 3	193 nm	WF-66_588,2_3	WF-66_588,2	Waterfound	Eearly hydrothermal muscovites	Altered	262.991	15.0954	6.78198	0.190678	0.892346	1577.93	21.55	5.25205	50.1808	255.429	98.4977	0.374528	2.54004
Session 3	193 nm	WF-66_588,2_4	WF-66_588,2	Waterfound	Eearly hydrothermal muscovites	Altered	269.661	16.9414	6.93876	0.23816	0.934303	1579.75	19.95	5.2964	52.2545	266.567	102.793	0.381193	2.64501
Session 3	193 nm	WF-66_588,2_5	WF-66_588,2	Waterfound	Eearly hydrothermal muscovites	Altered	243.649	13.9832	6.26158	0.154906	0.798256	1556	25.32	6.21729	54.8451	280.134	108.024	0.443361	2.77614
Session 3	193 nm	WF-66_588,2_6	WF-66_588,2	Waterfound	Eearly hydrothermal muscovites	Altered	213.124	12.0128	5.65307	0.14033	0.850834	1573.17	22.7	6.47118	51.5372	255.044	98.3495	0.461466	2.6087
Session 3	193 nm	WF-66_588,2_7	WF-66_588,2	Waterfound	Eearly hydrothermal muscovites	Altered	235.44	13.549	6.15493	0.158282	0.861524	1574.67	23.22	5.891	51.0816	256.489	98.9065	0.420093	2.58564
Session 3	193 nm	WF-66_588,2_8	WF-66_588,2	Waterfound	Eearly hydrothermal muscovites	Altered	224.345	12.9271	5.84086	0.173799	0.861771	1556.94	21.2	6.4106	52.7507	265.958	102.558	0.457146	2.67013
Session 3	193 nm	WF-66_588,2_9	WF-66_588,2	Waterfound	Eearly hydrothermal muscovites	Altered	221.814	12.6309	5.86571	0.129904	0.877689	1578.37	23.79	6.6648	55.0758	273.386	105.422	0.475273	2.78781
Session 3	193 nm	WF-66_588,2_10	WF-66_588,2	Waterfound	Eearly hydrothermal muscovites	Altered	172.268	10.0157	4.72909	0.123126	0.845093	1567.92	22.12	8.4295	56.1607	268.539	103.553	0.601116	2.84273
Session 3	193 nm	WF-66_588,2_11	WF-66_588,2	Waterfound	Eearly hydrothermal muscovites	Altered	205.054	11.4947	5.42867	0.138175	0.796374	1560.36	23.58	6.75824	51.6868	256.272	98.823	0.481936	2.61627
Session 3	193 nm	WF-66_588,2_12	WF-66_588,2	Waterfound	Eearly hydrothermal muscovites	Altered	191.027	10.5885	5.11246	0.11066	0.847185	1558.24	22.79	6.92309	49.8635	244.565	94.3087	0.493692	2.52398
Session 3	193 nm	WF-66_588,2_13	WF-66_588,2	Waterfound	Eearly hydrothermal muscovites	Altered	180.203	10.1061	4.92355	0.109965	0.804154	1573.84	23.89	7.73775	53.6718	257.856	99.4336	0.551787	2.71675
Session 3	193 nm	WF-66_588,2_14	WF-66_588,2	Waterfound	Eearly hydrothermal muscovites	Altered	250.445	14.7163	6.47386	0.189955	0.853057	1571.1	23.06	5.73587	52.6893	267.558	103.175	0.411966	2.66701
Session 3	193 nm	WF-66_588,2_15	WF-66_588,2	Waterfound	Eearly hydrothermal muscovites	Altered	250.959	14.6849	6.48238	0.189595	0.907196	1570.41	20.75	6.92404	63.2335	321.338	123.914	0.49376	3.20074
Session 3	193 nm	WF-66_588,2_16	WF-66_588,2	Waterfound	Eearly hydrothermal muscovites	Altered	264.293	15.9691	6.65859	0.215541	0.895732	1543	20.88	3.77274	35.391	184.392	71.1049	0.269038	1.79141
Session 3	193 nm	WF-66_588,2_17	WF-66_588,2	Waterfound	Eearly hydrothermal muscovites	Altered	231.475	13.6323	6.07606	0.183098	0.864357	1577.07	22.1	3.48269	29.8119	149.08	57.4877	0.248354	1.50901
Session 3	193 nm	WF-66_588,2_18	WF-66_588,2	Waterfound	Eearly hydrothermal muscovites	Altered	180.351	10.3991	4.97878	0.137915	0.856073	1590.25	21.45	5.3362	37.429	177.971	68.6288	0.38053	1.89457
Session 3	193 nm	WF-66_588,2_19	WF-66_588,2	Waterfound	Eearly hydrothermal muscovites	Altered	218.294	12.42	5.81864	0.123447	0.79071	1586.84	26.43	5.52165	45.263	222.901	85.9543	0.393754	2.29111
Session 3	193 nm	WF-66_588,2_20	WF-66_588,2	Waterfound	Eearly hydrothermal muscovites	Altered	216.95	12.4172	5.77898	0.155017	0.860158	1584.26	22.34	5.46764	44.5148	219.361	84.5894	0.389903	2.25324
Session 3	193 nm	WF-66_588,2_21	WF-66_588,2	Waterfound	Eearly hydrothermal muscovites	Altered	193.359	11.2365	5.19875	0.146796	0.863791	1568.68	21.32	7.55134	55.3065	270.015	104.123	0.538493	2.79949
Session 3	193 nm	WF-66_588,2_22	WF-66_588,2	Waterfound	Eearly hydrothermal muscovites	Altered	209.525	12.2331	5.56455	0.161688	0.894339	1570.79	20.39	7.10335	55.6861	275.232	106.134	0.506547	2.81871
Session 3	193 nm	WF-66_588,2_23	WF-66_588,2	Waterfound	Eearly hydrothermal muscovites	Altered	199.407	11.254	5.39386	0.116939	0.794458	1586.45	25.37	7.33998	55.7761	270.667	104.374	0.523421	2.82326
Session 3	193 nm	WF-66_588,2_24	WF-66_588,2	Waterfound	Eearly hydrothermal muscovites	Altered	205.773	11.6497	5.54801	0.13046	0.807693	1589.7	24.68	7.11538	55.6145	270.761	104.41	0.507405	2.81509
Session 3	193 nm	WF-66_588,2_25	WF-66_588,2	Waterfound	Eearly hydrothermal muscovites	Altered	182.502	10.1465	5.0439	0.119988	0.808965	1595.5	23.36	7.7395	54.9961	261.204	100.725	0.551911	2.78378
Session 3	193 nm	WF-66_588,2_26	WF-66_588,2	Waterfound	Eearly hydrothermal muscovites	Altered	182.327	10.212	5.05689	0.115232	0.73918	1600.8	25.85	8.30655	59.1776	280.073	108.001	0.592348	2.99544
Session 3	193 nm	WF-66_588,2_27	WF-66_588,2	Waterfound	Eearly hydrothermal muscovites	Altered	233.598	13.2061	6.24397	0.148531	0.758796	1607.78	26.84	7.06228	62.1239	308.047	118.788	0.508516	3.17516
Session 3	193 nm	WF-66_588,2_28	WF-66_588,2	Waterfound	Eearly hydrothermal muscovites	Altered	230.503	13.0886	6.18705	0.154566	0.798962	1611.23	25.46	6.63119	57.8001	282.663	109	0.472877	2.92571
Session 3	193 nm	WF-66_588,2_29	WF-66_588,2	Waterfound	Eearly hydrothermal muscovites	Altered	219.814	12.5167	5.93593	0.165283	0.905404	1609.15	20.39	8.65222	72.3552	351.709	135.625	0.616998	3.66246
Session 3	193 nm	WF-66_588,2_30	WF-66_588,2	Waterfound	Eearly hydrothermal muscovites	Altered	232.984	13.304	6.15075	0.16528	0.88304	1587.55	21.83	5.3965	46.762	232.508	89.6593	0.38483	2.36699
Session 3	193 nm	WF-66_588,2_31	WF-66_588,2	Waterfound	Eearly hydrothermal muscovites	Altered	223.876	13.2688	5.96139	0.169566	0.85352	1591.49	23.39	6.15031	51.6533	254.628	98.1888	0.438585	2.61458
Session 3	193 nm	WF-66_588,2_32	WF-66_588,2	Waterfound	Eearly hydrothermal muscovites	Altered	217.895	12.9586	5.82082	0.136677	0.85066	1589.85	25.53	6.70427	54.978	270.146	104.173	0.478088	2.78286
Session 3	193 nm	WF-66_588,2_33	WF-66_588,2	Waterfound	Eearly hydrothermal muscovites	Altered	209.39	11.8269	5.54059	0.14116	0.730365	1564.93	25.9	6.9453	53.9859	268.935	103.706	0.495276	2.74412
Session 3	193 nm	WF-66_588,2_34	WF-66_588,2	Waterfound	Eearly hydrothermal muscovites	Altered	239.768	13.4638	6.38512	0.172605	0.817642	1608.03	23.96	6.22712	56.0156	277.786	107.119	0.446761	2.85262
Session 3	193 nm	WF-66_588,2_35	WF-66_588,2	Waterfound	Eearly hydrothermal muscovites	Altered	255.824	14.5732	6.62177	0.174975	0.809195	1577.83	24.76	6.06857	56.6127	287.096	110.709	0.432755	2.86561
Session 3	193 nm	WF-66_588,2_36	WF-66_588,2	Waterfound	Eearly hydrothermal muscovites	Altered	194.921	11.6267	5.21103	0.133851	0.837814	1562.06	23.99	9.30285	68.2956	335.331	129.31	0.663395	3.45697
Session 3	193 nm	WF-66_588,2_37	WF-66_588,2	Waterfound	Eearly hydrothermal muscovites	Altered	249.515	14.9654	6.39532	0.191995	0.882282	1557.16	22.11	4.504	40.5802	207.824	80.1405	0.321185	2.05408
Session 3	193 nm	WF-66_588,2_38	WF-66_588,2	Waterfound	Eearly hydrothermal muscovites	Altered	341.268	20.336	8.85559	0.225426	0.831805	1638.07	28.32	4.49414	56.0682	283.623	109.37	0.320481	2.83805
Session 3	193 nm	WF-66_588,2_39	WF-66_588,2	Waterfound	Eearly hydrothermal muscovites	Altered	201.734	11.7547	5.34829	0.161997	0.844247	1558.29	21.57	6.77047	51.0138	252.579	97.3989	0.482809	2.5822
Session 3	193 nm	WF-66_588,2_40	WF-66_588,2	Waterfound	Eearly hydrothermal muscovites	Altered	319.807	18.5284	7.89498	0.191581	0.873918	1548.15	24.76	4.93137	55.1899	293.611	113.222	0.354031	2.79506
Session 3	193 nm	WF-66_588,2_41	WF-66_588,2	Waterfound	Eearly hydrothermal muscovites	Altered	204.893	5.22502	5.62499	0.158811	0.83731	1617.2	12.49	3.36433	26.6484	139.109	53.6429	0.261809	1.47268
Session 3	193 nm	WF-66_588,2_42	WF-66_588,2	Waterfound	Eearly hydrothermal muscovites	Altered	251.374	7.85965	6.60554	0.215878	0.87769	1597.67	12.46	3.63399	33.802	184.347	71.0872	0.282794	1.86801
Session 3	193 nm	WF-66_588,2_43	WF-66_588,2	Waterfound	Eearly hydrothermal muscovites	Altered	201.993	5.26064	5.51415	0.161961	0.875243	1604.39	11.73	5.24427	40.7207	212.037	81.765	0.404792	2.23208
Session 3	193 nm	WF-66_588,2_44	WF-66_588,2	Waterfound	Eearly hydrothermal muscovites	Altered	229.065	6.95905	6.14606	0.200723	0.844443	1609.1	13.99	4.91748	42.5589	227.317	87.6573	0.382675	2.35194
Session 3	193 nm	WF-66_588,2_45	WF-66_588,2	Waterfound	Eearly hydrothermal muscovites	Altered	211.827	6.78391	5.84107	0.167259	0.898942	1633.13	10.16	5.75579	47.3422	246.047	94.8798	0.447912	2.61628
Session 3	193 nm	WF-66_588,2_46	WF-66_588,2	Waterfound	Eearly hydrothermal muscovites	Altered	174.776	5.4718	5.00835	0.159694	0.927756	1640.4	10.25	6.78126	47.8251	239.179	92.2317	0.527713	2.64297
Session 3	193 nm	WF-66_588,2_47	WF-66_588,2	Waterfound	Eearly hydrothermal muscovites	Altered	238.969	7.00531	6.40843	0.189697	0.85277	1618.38	12.37	6.14717	55.4725	296.447	114.315	0.478368	3.06559
Session 3	193 nm	WF-66_588,2_48	WF-66_588,2	Waterfound	Eearly hydrothermal muscovites	Altered	236.53	6.69816	6.3414	0.193351	0.872185	1615.55	12.08	4.82485	43.0844	230.304	88.8091	0.375467	2.38098
Session 3	193 nm	WF-66_588,2_49	WF-66_588,2	Waterfound	Eearly hydrothermal muscovites	Altered	201.746	4.86455	5.52031	0.117511	0.775771	1607.77	11.04	4.73512	37.0534	192.782	74.3402	0.368484	2.03414
Session 3	193 nm	WF-66_588,2_50	WF-66_588,2	Waterfound	Eearly hydrothermal muscovites	Altered	214.065	5.56843	5.8296	0.150403	0.867876	1615.84	10.25	5.55869	45.6313	240.131	92.5987	0.432574	2.52173
Session 3	193 nm	WF-66_588,2_51	WF-66_588,2	Waterfound	Eearly hydrothermal muscovites	Altered	208.563	5.37568	5.62039	0.15429	0.803305	1592.42	12.88	7.00174	55.4145	294.695	113.64	0.544871	3.06238
Session 3	193 nm	WF-66_588,2_52	WF-66_588,2	Waterfound	Eearly hydrothermal muscovites	Altered	202.453	5.69812	5.53598	0.133522	0.824092	1607.66	11.21	7.74244	60.8356	316.325	121.98	0.602511	3.33549
Session 3	193 nm	WF-66_588,2_53	WF-66_588,2	Waterfound	Eearly hydrothermal muscovites	Altered	248.314	9.33867	6.58714	0.247854	0.912251	1609.92	12.38	4.26364	39.5484	212.121	81.7977	0.329412	2.16988
Session 3	193 nm	WF-66_588,2_54	WF-66_588,2	Waterfound	Eearly hydrothermal muscovites	Altered	203.532	6.32216	5.61749	0.147336	0.794271	1623.95	13.41	5.26785	41.6703	216.37	83.4359	0.40994	2.30284
Session 3	193 nm	WF-66_588,2_55	WF-66_588,2	Waterfound	Eearly hydrothermal muscovites	Altered	200.591	5.29683	5.4983	0.1256	0.779187	1609	11.85	6.38526	49.4377	258.476	99.6729	0.496896	2.73209
Session 3	193 nm	WF-66_588,2_56	WF-66_588,2	Waterfound	Eearly hydrothermal muscovites	Altered	287.147	8.80395	7.51111	0.240619	0.908016	1618.56	10.89	4.73663	50.0985	274.477	105.843	0.368601	2.76861
Session 3	193 nm	WF-66_588,2_57	WF-66_588,2	Waterfound	Eearly hydrothermal muscovites	Altered	239.128	7.28931	6.38674	0.212788	0.810569	1612.06	15.57	6.33196	56.9467	305.562	117.83	0.492749	3.14706
Session 3	193 nm	WF-66_588,2_58	WF-66_588,2	Waterfound	Eearly hydrothermal muscovites	Altered	229.86	6.9029	6.0684	0.180289	0.903502	1584.38	10.03	4.03914	34.5155	187.363	72.2504	0.314323	1.90744
Session 3	193 nm	WF-66_588,2_59	WF-66_588,2	Waterfound	Eearly hydrothermal muscovites	Altered	251.72	8.65327	6.58883	0.261332	0.926667	1591.82	13.04	4.50346	41.7836	228.768	88.2167	0.350456	2.3091
Session 3	193 nm	WF-66_588,2_60	WF-66_588,2	Waterfound	Eearly hydrothermal muscovites	Altered	263.933	6.10791	6.92114	0.160501	0.816254	1605.03	10.67	4.80178	46.7984	255.757	98.6243	0.373671	2.58623
Session 3	193 nm	WF-66_588,2_61	WF-66_588,2	Waterfound	Eearly hydrothermal muscovites	Altered	200.161	4.79129	5.43705	0.123747	0.824366	1594.07	10.19	6.9137	52.9328	279.267	107.69	0.538019	2.92524
Session 3	193 nm	WF-66_588,2_62	WF-66_588,2	Waterfound	Eearly hydrothermal muscovites	Altered	269.399	9.03357	7.11622	0.239837	0.922333	1621.05	10.56	5.4413	55.1145	298.69	115.18	0.427545	3.0425
Session 3	193 nm	WF-66_588,2_63	WF-66_588,2	Waterfound	Eearly hydrothermal muscovites	Altered	249.409	7.2178	6.57148	0.208396	0.908695	1600.15	10.94	5.82205	54.489	294.42	113.533	0.455209	2.9914
Session 3	193 nm	WF-66_588,2_64	WF-66_588,2	Waterfound	Eearly hydrothermal muscovites	Altered	196.881	5.83757	5.2709	0.149458	0.885154	1566.94	10.23	6.8337	50.7214	271.513	104.7	0.531794	2.80303
Session 3	193 nm	WF-66_588,2_65	WF-66_588,2	Waterfound	Eearly hydrothermal muscovites	Altered	236.348	6.23198	6.26093	0.198436	0.835642	1596.31	14.11	6.11277	53.8925	291.555	112.429	0.475692	2.97827
Session 3	193 nm	WF-66_588,2_66	WF-66_588,2	Waterfound	Eearly hydrothermal muscovites	Altered	188.993	5.58354	5.31047	0.163681	0.950286	1632.04	8.75	6.91133	51.6827	265.414	102.348	0.541543	2.87585
Session 3	193 nm	WF-66_588,2_67	WF-66_588,2	Waterfound	Eearly hydrothermal muscovites	Altered	207.278	6.48062	5.65584	0.183909	0.900007	1610.55	11.57	6.662	53.0582	278.669	107.459	0.518432	2.93217
Session 3	193 nm	WF-66_588,2_68	WF-66_588,2	Waterfound	Eearly hydrothermal muscovites	Altered	190.703	4.69737	5.21412	0.129172	0.847257	1591.08	10.37	7.79838	57.258	300.118	115.731	0.606865	3.16426
Session 3	193 nm	WF-66_588,2_69	WF-66_588,2	Waterfound	Eearly hydrothermal muscovites	Altered	214.772	5.59216	5.88193	0.167208	0.893137	1625.72	10.66	4.86649	40.3076	210.924	81.3358	0.378707	2.22753
Session 3	193 nm	WF-66_588,2_70	WF-66_588,2	Waterfound	Eearly hydrothermal muscovites	Altered	306.077	10.308	7.9722	0.256164	0.895069	1624.23	11.53	4.25247	47.7387	262.665	101.288	0.330924	2.63819
Session 3	193 nm	WF-75_690_1	WF-75_690	Waterfound	Eearly hydrothermal muscovites	Altered	221.219	13.5919	5.85214	0.280003	0.902658	1683	19.9	2.33036	19.0644	96.8388	37.3427	0.168804	0.987866
Session 3	193 nm	WF-75_690_2	WF-75_690	Waterfound	Eearly hydrothermal muscovites	Altered	187.028	13.2744	5.08321	0.288021	0.912156	1697.8	21.6	3.31628	23.7561	115.275	44.4521	0.237676	1.20816
Session 3	193 nm	WF-75_690_3	WF-75_690	Waterfound	Eearly hydrothermal muscovites	Altered	218.578	13.6753	5.57837	0.238823	0.888457	1622.4	21.5	3.66817	28.8365	149.016	57.4633	0.262896	1.46653
Session 3	193 nm	WF-75_690_4	WF-75_690	Waterfound	Eearly hydrothermal muscovites	Altered	206.934	12.4335	5.46306	0.233707	0.95609	1668.2	14.8	3.84072	29.5688	147.714	56.9612	0.275263	1.50378
Session 3	193 nm	WF-75_690_5	WF-75_690	Waterfound	Eearly hydrothermal muscovites	Altered	110.879	5.96357	3.35976	0.108773	0.699759	1751.6	27.2	7.1032	33.6316	146.38	56.4467	0.509084	1.7104
Session 3	193 nm	WF-75_690_6	WF-75_690	Waterfound	Eearly hydrothermal muscovites	Altered	163.919	10.4542	4.60743	0.194871	0.768996	1727	30.2	4.90959	31.8779	149.573	57.6778	0.351868	1.62121
Session 3	193 nm	WF-75_690_7	WF-75_690	Waterfound	Eearly hydrothermal muscovites	Altered	148.337	9.96275	4.30299	0.224602	0.914397	1757.7	20.2	5.27046	31.9598	145.304	56.0316	0.377732	1.62537
Session 3	193 nm	WF-75_690_8	WF-75_690	Waterfound	Eearly hydrothermal muscovites	Altered	219.909	17.138	5.64559	0.358964	0.932087	1632.9	20.5	3.21094	25.5462	131.236	50.6069	0.230127	1.2992
Session 3	193 nm	WF-75_690_9	WF-75_690	Waterfound	Eearly hydrothermal muscovites	Altered	121.821	7.13216	3.5111	0.137949	0.804808	1694.5	24.2	6.14976	30.4289	139.239	53.6928	0.440751	1.54752
Session 3	193 nm	WF-75_690_10	WF-75_690	Waterfound	Eearly hydrothermal muscovites	Altered	120.575	6.79728	3.56034	0.128601	0.840971	1732.5	21.8	6.73748	33.8045	150.985	58.2224	0.482872	1.71919
Session 3	193 nm	WF-75_690_11	WF-75_690	Waterfound	Eearly hydrothermal muscovites	Altered	87.1465	6.6393	2.69004	0.170376	0.808947	1700.6	32	8.45071	32.036	136.874	52.7811	0.605659	1.62925
Session 3	193 nm	WF-75_690_12	WF-75_690	Waterfound	Eearly hydrothermal muscovites	Altered	115.058	7.3282	3.31692	0.145671	0.86597	1678.4	21.8	7.39015	34.5441	158.034	60.9405	0.529649	1.75681
Session 3	193 nm	WF-75_690_13	WF-75_690	Waterfound	Eearly hydrothermal muscovites	Altered	88.5734	4.6102	2.57692	0.0750085	0.745513	1609.6	21.6	6.12818	22.2545	100.882	38.9018	0.439204	1.13179
Session 3	193 nm	WF-75_690_14	WF-75_690	Waterfound	Eearly hydrothermal muscovites	Altered	119.369	7.72921	3.2343	0.197587	0.584889	1588.7	41.4	5.55135	25.3025	123.16	47.4925	0.397863	1.28681
Session 3	193 nm	WF-75_690_15	WF-75_690	Waterfound	Eearly hydrothermal muscovites	Altered	161.648	10.0209	4.48676	0.200141	0.810643	1702.6	26.5	4.4904	28.3925	134.907	52.0223	0.321825	1.44395
Session 3	193 nm	WF-75_690_16	WF-75_690	Waterfound	Eearly hydrothermal muscovites	Altered	123.213	7.12625	3.53631	0.128635	0.810895	1690.7	23.7	6.51821	32.4836	149.267	57.5599	0.467158	1.65201
Session 3	193 nm	WF-75_690_17	WF-75_690	Waterfound	Eearly hydrothermal muscovites	Altered	124.384	7.28802	3.48607	0.14519	0.868995	1654	19.8	5.92417	29.1037	136.953	52.8113	0.424583	1.48013
Session 3	193 nm	WF-75_690_18	WF-75_690	Waterfound	Eearly hydrothermal muscovites	Altered	188.997	15.6496	4.81895	0.330488	0.923323	1595.8	22.2	3.9418	26.769	138.461	53.393	0.282508	1.36139
Session 3	193 nm	WF-75_690_19	WF-75_690	Waterfound	Eearly hydrothermal muscovites	Altered	174.207	12.2267	4.77527	0.245912	0.846076	1697.7	27.5	4.405	29.6435	142.623	54.9979	0.315705	1.50757
Session 3	193 nm	WF-75_690_20	WF-75_690	Waterfound	Eearly hydrothermal muscovites	Altered	116.706	6.61717	3.33447	0.121011	0.727357	1667.8	26.5	6.39222	30.0375	138.651	53.4663	0.458128	1.52762
Session 3	193 nm	WF-75_690_21	WF-75_690	Waterfound	Eearly hydrothermal muscovites	Altered	152.262	9.49961	4.28721	0.184627	0.880447	1713	21.8	4.11819	24.8809	116.54	44.9399	0.295149	1.26537
Session 3	193 nm	WF-75_690_22	WF-75_690	Waterfound	Eearly hydrothermal muscovites	Altered	203.428	13.3648	5.48728	0.274462	0.819527	1701	28.3	3.46571	26.8	131.033	50.5287	0.248386	1.36297
Session 3	193 nm	WF-75_690_23	WF-75_690	Waterfound	Eearly hydrothermal muscovites	Altered	175.165	9.87046	4.73875	0.171829	0.886856	1676.9	19.9	4.24317	28.7137	139.621	53.8402	0.307369	1.45655
Session 3	193 nm	WF-75_690_24	WF-75_690	Waterfound	Eearly hydrothermal muscovites	Altered	212.6	14.2783	5.72149	0.306745	0.863073	1705	25.6	3.75379	30.2666	148.324	57.1962	0.269033	1.53927
Session 3	193 nm	WF-75_690_25	WF-75_690	Waterfound	Eearly hydrothermal muscovites	Altered	200.191	12.2349	5.40204	0.261775	0.898842	1698.7	20	4.1058	31.2565	152.764	58.9085	0.294261	1.58961
Session 3	193 nm	WF-75_690_26	WF-75_690	Waterfound	Eearly hydrothermal muscovites	Altered	154.4	8.25507	4.31785	0.138226	0.749552	1704.7	25.8	6.31239	38.4102	181.143	69.8517	0.452406	1.95342
Session 3	193 nm	WF-75_690_27	WF-75_690	Waterfound	Eearly hydrothermal muscovites	Altered	144.803	7.97561	3.952	0.191535	0.68393	1649.3	31	4.2404	23.6162	114.12	44.0068	0.303908	1.20104
Session 3	193 nm	WF-75_690_28	WF-75_690	Waterfound	Eearly hydrothermal muscovites	Altered	190.571	12.3193	5.08524	0.230626	0.818947	1670.8	27.1	3.7732	27.04	133.642	51.5348	0.270424	1.37517
Session 3	193 nm	WF-75_690_29	WF-75_690	Waterfound	Eearly hydrothermal muscovites	Altered	196.383	12.4867	5.45092	0.28522	0.85323	1743	25.6	4.01171	30.8166	146.424	56.4635	0.287518	1.56724
Session 3	193 nm	WF-75_690_30	WF-75_690	Waterfound	Eearly hydrothermal muscovites	Altered	159.856	9.88802	4.43934	0.212166	0.888079	1700.9	20.7	5.12035	32.0335	152.128	58.6631	0.366973	1.62912
Session 3	193 nm	WF-75_690_31	WF-75_690	Waterfound	Eearly hydrothermal muscovites	Altered	176.933	11.0095	4.78023	0.232642	0.833766	1676.7	25.1	4.34936	29.2995	143.026	55.1532	0.311717	1.49008
Session 3	193 nm	WF-75_690_32	WF-75_690	Waterfound	Eearly hydrothermal muscovites	Altered	177.148	11.1548	4.85075	0.247537	0.898621	1699.4	20.4	3.62778	24.799	119.442	46.0587	0.260002	1.2612
Session 3	193 nm	WF-75_690_33	WF-75_690	Waterfound	Eearly hydrothermal muscovites	Altered	149.195	9.63552	4.259	0.198407	0.800342	1731.5	28.5	4.7678	28.6161	132.206	50.9809	0.341706	1.45533
Session 3	193 nm	WF-75_690_34	WF-75_690	Waterfound	Eearly hydrothermal muscovites	Altered	104.914	6.30906	3.07808	0.128136	0.878671	1679.4	19.3	5.92877	25.7175	115.605	44.5791	0.424912	1.30791
Session 3	193 nm	WF-75_690_35	WF-75_690	Waterfound	Eearly hydrothermal muscovites	Altered	169.039	9.82342	4.62015	0.177403	0.821564	1686.5	24.2	4.92469	32.0642	154.719	59.6624	0.352951	1.63069
Session 3	193 nm	WF-75_690_36	WF-75_690	Waterfound	Eearly hydrothermal muscovites	Altered	72.6382	4.49546	2.35224	0.108482	0.849558	1708.5	21.4	8.07878	26.7802	109.066	42.0577	0.579003	1.36196
Session 3	193 nm	WF-75_690_37	WF-75_690	Waterfound	Eearly hydrothermal muscovites	Altered	95.8592	6.48925	2.80603	0.111584	0.818201	1646.3	25.4	5.183	20.4955	92.3408	35.6082	0.371463	1.04234
Session 3	193 nm	WF-75_690_38	WF-75_690	Waterfound	Eearly hydrothermal muscovites	Altered	201.12	18.2951	5.18903	0.417611	0.933207	1625.8	23.7	3.1672	23.1604	118.388	45.6526	0.226992	1.17787
Session 3	193 nm	WF-75_690_39	WF-75_690	Waterfound	Eearly hydrothermal muscovites	Altered	190.727	13.4763	5.04655	0.312868	0.818402	1657.1	30.7	3.45761	24.5898	122.565	47.2632	0.247805	1.25056
Session 3	193 nm	WF-75_690_40	WF-75_690	Waterfound	Eearly hydrothermal muscovites	Altered	84.6017	5.2792	2.61809	0.101426	0.610677	1693.7	32.9	8.59409	31.7081	135.132	52.1091	0.615935	1.61257
Session 3	193 nm	WF-77_603_1	WF-77_603	Waterfound	Eearly hydrothermal muscovites	Altered	140.782	7.29068	4.10164	0.100791	0.747085	1723.4	25.4	10.0756	58.4255	288.858	111.389	0.791215	3.24528
Session 3	193 nm	WF-77_603_2	WF-77_603	Waterfound	Eearly hydrothermal muscovites	Altered	234.795	13.3107	6.34334	0.189794	0.830582	1710.2	26	5.75349	51.597	275.097	106.082	0.451809	2.86598
Session 3	193 nm	WF-77_603_3	WF-77_603	Waterfound	Eearly hydrothermal muscovites	Altered	225.357	11.783	6.14771	0.178551	0.786044	1719.2	25.3	5.74435	49.9262	263.62	101.657	0.451091	2.77318
Session 3	193 nm	WF-77_603_4	WF-77_603	Waterfound	Eearly hydrothermal muscovites	Altered	228.749	12.899	6.32425	0.22562	0.885389	1744.8	21.6	5.9946	53.5974	279.245	107.682	0.470743	2.9771
Session 3	193 nm	WF-77_603_5	WF-77_603	Waterfound	Eearly hydrothermal muscovites	Altered	208.94	11.5144	5.83385	0.19252	0.901817	1744.4	20.4	6.78074	55.925	288.513	111.256	0.532477	3.10639
Session 3	193 nm	WF-77_603_6	WF-77_603	Waterfound	Eearly hydrothermal muscovites	Preserved	210.78	11.8582	5.93791	0.176227	0.892057	1761.6	23.4	6.55357	55.0155	281.303	108.475	0.514637	3.05587
Session 3	193 nm	WF-77_603_7	WF-77_603	Waterfound	Eearly hydrothermal muscovites	Altered	247.722	14.3379	6.81882	0.251908	0.931626	1751.5	19.2	5.60216	54.0056	282.609	108.979	0.439925	2.99977
Session 3	193 nm	WF-77_603_8	WF-77_603	Waterfound	Eearly hydrothermal muscovites	Preserved	239.384	13.1521	6.78203	0.208707	0.806235	1795.9	27	5.51213	52.851	268.709	103.619	0.432856	2.93564
Session 3	193 nm	WF-77_603_9	WF-77_603	Waterfound	Eearly hydrothermal muscovites	Preserved	232.276	13.4922	6.49004	0.229078	0.874869	1766	23.7	6.5353	59.9635	309.127	119.205	0.513203	3.33071
Session 3	193 nm	WF-77_603_10	WF-77_603	Waterfound	Eearly hydrothermal muscovites	Preserved	225.53	11.5336	6.28664	0.129334	0.790304	1756.4	27.7	6.06835	53.9341	278.703	107.473	0.476534	2.9958
Session 3	193 nm	WF-77_603_11	WF-77_603	Waterfound	Eearly hydrothermal muscovites	Altered	171.242	9.29806	4.82553	0.146269	0.852117	1716.9	22.3	7.94393	54.1945	277.021	106.824	0.623819	3.01026
Session 3	193 nm	WF-77_603_14	WF-77_603	Waterfound	Eearly hydrothermal muscovites	Altered	206.821	11.3553	5.73817	0.215162	0.849463	1731.5	22.1	7.03925	57.105	293.826	113.304	0.547839	3.14359
Session 3	193 nm	WF-77_603_15	WF-77_603	Waterfound	Eearly hydrothermal muscovites	Preserved	208.192	11.5077	5.88	0.154685	0.878447	1763.5	24.9	6.77321	56.3049	287.161	110.734	0.531885	3.12748
Session 3	193 nm	WF-77_603_16	WF-77_603	Waterfound	Eearly hydrothermal muscovites	Preserved	189.519	10.3189	5.4229	0.137835	0.89632	1766.3	23.7	7.31774	56.1026	282.421	108.907	0.574646	3.11625
Session 3	193 nm	WF-77_603_18	WF-77_603	Waterfound	Eearly hydrothermal muscovites	Preserved	149.694	8.24584	4.43185	0.106297	0.768002	1767.9	28	8.94096	56.0201	272.555	105.102	0.702114	3.11167
Session 3	193 nm	WF-77_603_19	WF-77_603	Waterfound	Eearly hydrothermal muscovites	Preserved	201.333	11.0079	5.73056	0.156944	0.809276	1770.1	26.7	7.11618	57.6525	291.762	112.508	0.558818	3.20234
Session 3	193 nm	WF-77_603_20	WF-77_603	Waterfound	Eearly hydrothermal muscovites	Altered	210.392	11.9287	5.815	0.169771	0.801527	1728.3	27.3	6.58358	54.1235	282.071	108.771	0.516994	3.00632
Session 3	193 nm	WF-77_603_21	WF-77_603	Waterfound	Eearly hydrothermal muscovites	Altered	211.432	11.8197	5.88375	0.147615	0.593118	1741	34.4	7.02711	58.4528	302.562	116.673	0.551824	3.24679
Session 3	193 nm	WF-77_603_22	WF-77_603	Waterfound	Eearly hydrothermal muscovites	Altered	260.582	14.086	7.01539	0.190934	0.690825	1721.9	30.6	6.70004	66.4513	355.54	137.102	0.526139	3.69107
Session 3	193 nm	WF-77_603_23	WF-77_603	Waterfound	Eearly hydrothermal muscovites	Preserved	189.45	10.1563	5.42988	0.168506	0.763344	1769.1	26.7	7.53645	57.8537	290.756	112.12	0.591821	3.21352
Session 3	193 nm	WF-77_603_24	WF-77_603	Waterfound	Eearly hydrothermal muscovites	Preserved	190.579	10.2146	5.43772	0.121808	0.75042	1762.6	29.1	8.11066	62.4048	315.249	121.565	0.637874	3.46858
Session 3	193 nm	WF-77_603_25	WF-77_603	Waterfound	Eearly hydrothermal muscovites	Preserved	202.415	10.9997	5.73608	0.161868	0.889648	1763.6	22.8	7.57912	61.4622	312.413	120.472	0.595172	3.41395
Session 3	193 nm	WF-77_603_26	WF-77_603	Waterfound	Eearly hydrothermal muscovites	Preserved	187.432	10.2146	5.45776	0.16081	0.889895	1794.6	22.3	8.90357	69.22	342.826	132.2	0.705319	3.84946
Session 3	193 nm	WF-77_603_27	WF-77_603	Waterfound	Eearly hydrothermal muscovites	Preserved	194.807	10.3073	5.58286	0.145247	0.845721	1775.1	24.6	7.23994	57.1434	287.214	110.755	0.568536	3.17406
Session 3	193 nm	WF-77_603_28	WF-77_603	Waterfound	Eearly hydrothermal muscovites	Altered	169.991	9.2929	4.79603	0.114948	0.714124	1717.2	29.1	8.10231	54.937	280.479	108.158	0.636256	3.0515
Session 3	193 nm	WF-77_603_29	WF-77_603	Waterfound	Eearly hydrothermal muscovites	Preserved	513.792	31.9836	13.5439	0.591269	0.91806	1768.7	22.5	2.85687	54.7024	298.912	115.266	0.224343	3.03847
Session 3	193 nm	WF-77_603_30	WF-77_603	Waterfound	Eearly hydrothermal muscovites	Altered	416.8	23.1839	10.9793	0.365641	0.909876	1747.1	22.3	3.78447	59.7433	326.492	125.901	0.302066	3.31646
Session 3	193 nm	WF-77_603_31	WF-77_603	Waterfound	Eearly hydrothermal muscovites	Altered	233.833	13.1378	6.38957	0.217297	0.687201	1728.8	31.2	4.46096	40.2971	212.423	81.9141	0.35031	2.23833
Session 3	193 nm	WF-77_603_32	WF-77_603	Waterfound	Eearly hydrothermal muscovites	Preserved	34.8519	1.73884	1.56216	0.0325098	0.619667	1770.6	19.4	28.7277	63.4452	203.889	78.6232	2.25592	3.5241
Session 3	193 nm	WF-77_603_33	WF-77_603	Waterfound	Eearly hydrothermal muscovites	Altered	109.226	6.33105	3.3478	0.084247	0.661346	1731.2	30.1	13.4662	63.7352	299.529	115.503	1.05747	3.54021
Session 3	193 nm	WF-77_603_34	WF-77_603	Waterfound	Eearly hydrothermal muscovites	Altered	142.311	7.89576	4.21684	0.143524	0.856071	1755.4	21.4	10.2211	60.9336	296.212	114.224	0.802637	3.38459
Session 3	193 nm	WF-77_603_35	WF-77_603	Waterfound	Eearly hydrothermal muscovites	Preserved	156.205	8.92955	4.56387	0.129047	0.80755	1756.2	26.6	8.17353	52.7373	259.999	100.26	0.64185	2.92932
Session 3	193 nm	WF-77_603_36	WF-77_603	Waterfound	Eearly hydrothermal muscovites	Altered	121.44	7.28842	3.54791	0.116559	0.846797	1684.7	22.8	12.3913	62.1532	306.44	118.169	0.973059	3.45233
Session 3	193 nm	WF-77_603_37	WF-77_603	Waterfound	Eearly hydrothermal muscovites	Preserved	157.682	8.64701	4.65335	0.118576	0.746836	1776.1	28.5	9.92571	64.9152	318.722	122.905	0.779444	3.62703
Session 3	193 nm	WF-77_603_38	WF-77_603	Waterfound	Eearly hydrothermal muscovites	Altered	172.835	9.79535	4.86852	0.144367	0.777096	1718.4	27.1	4.96277	34.1582	174.672	67.3564	0.389715	1.89734
Session 3	193 nm	WF-77_603_39	WF-77_603	Waterfound	Eearly hydrothermal muscovites	Altered	184.127	10.1665	5.13029	0.137952	0.617113	1714.2	32.1	5.37447	39.5525	204.476	78.8493	0.428234	2.19696
Session 4	193 nm	WC-449_537,7_1	WC-449_537,7	Cigar Lake	Eearly hydrothermal muscovites	Altered	56.0359	1.5257	2.02061	0.0529371	0.638307	1625.3	16.2	12.3787	35.4833	136.732	52.7261	0.940935	1.90126
Session 4	193 nm	WC-449_537,7_2	WC-449_537,7	Cigar Lake	Eearly hydrothermal muscovites	Altered	46.889	1.44318	1.80059	0.0466391	0.685568	1616.5	15.1	14.4219	36.5911	132.401	51.0561	1.08887	1.96061
Session 4	193 nm	WC-449_537,7_3	WC-449_537,7	Cigar Lake	Eearly hydrothermal muscovites	Altered	99.8017	2.70853	3.05114	0.0949777	0.710714	1638.7	17.8	6.96009	29.9236	136.003	52.4452	0.525495	1.60336
Session 4	193 nm	WC-449_537,7_4	WC-449_537,7	Cigar Lake	Eearly hydrothermal muscovites	Altered	65.4537	1.60382	2.24225	0.0657803	0.725491	1629.1	16.7	9.33058	29.4801	119.575	46.1101	0.704469	1.5796
Session 4	193 nm	WC-449_537,7_5	WC-449_537,7	Cigar Lake	Eearly hydrothermal muscovites	Altered	90.0214	2.86389	2.77738	0.067523	0.490826	1611.6	19.2	6.72726	26.3275	118.572	45.7232	0.507915	1.41067
Session 4	193 nm	WC-449_537,7_6	WC-449_537,7	Cigar Lake	Eearly hydrothermal muscovites	Altered	78.8104	1.84284	2.54402	0.0741351	0.750404	1625.5	16	7.88722	28.2736	121.704	46.9311	0.595494	1.51495
Session 4	193 nm	WC-449_537,7_7	WC-449_537,7	Cigar Lake	Eearly hydrothermal muscovites	Altered	46.5119	2.07174	1.82843	0.0584531	0.776968	1649	16.5	13.198	34.0035	120.19	46.3474	0.996464	1.82197
Session 4	193 nm	WC-449_537,7_8	WC-449_537,7	Cigar Lake	Eearly hydrothermal muscovites	Altered	95.5804	2.31439	2.93755	0.0744061	0.584506	1630.1	16.8	7.02721	29.0874	131.507	50.7113	0.530562	1.55855
Session 4	193 nm	WC-449_537,7_9	WC-449_537,7	Cigar Lake	Eearly hydrothermal muscovites	Altered	122.609	6.11434	3.51842	0.13589	0.919588	1611.1	12.5	6.14568	30.4687	147.533	56.8914	0.464006	1.63256
Session 4	193 nm	WC-449_537,7_10	WC-449_537,7	Cigar Lake	Eearly hydrothermal muscovites	Altered	80.3076	3.35608	2.58699	0.0780743	0.883684	1630.8	11.7	9.58655	34.9457	150.736	58.1263	0.723795	1.87245
Session 4	193 nm	WC-449_537,7_11	WC-449_537,7	Cigar Lake	Eearly hydrothermal muscovites	Altered	83.3325	2.62322	2.6223	0.0887601	0.632053	1610	20.9	7.16669	26.4812	116.931	45.0906	0.541093	1.41891
Session 4	193 nm	WC-449_537,7_12	WC-449_537,7	Cigar Lake	Eearly hydrothermal muscovites	Altered	51.1047	1.36398	1.91102	0.0397338	0.525821	1628.4	14.9	14.5141	39.0834	145.227	56.0022	1.09583	2.09416
Session 4	193 nm	WC-449_537,7_13	WC-449_537,7	Cigar Lake	Eearly hydrothermal muscovites	Altered	58.2268	2.61711	2.02976	0.0903601	0.910016	1593.3	17.1	12.8753	36.8247	146.784	56.6023	0.972101	1.97313
Session 4	193 nm	WC-449_537,7_14	WC-449_537,7	Cigar Lake	Eearly hydrothermal muscovites	Altered	93.1249	3.82685	2.84726	0.0815256	0.73961	1611.2	17.1	7.39208	29.6572	134.781	51.9739	0.55811	1.58908
Session 4	193 nm	WC-449_537,7_15	WC-449_537,7	Cigar Lake	Eearly hydrothermal muscovites	Altered	54.6569	1.31213	2.04265	0.0507882	0.582547	1668.7	16.7	10.4386	30.0451	111.708	43.0764	0.788125	1.60987
Session 4	193 nm	WC-449_537,7_16	WC-449_537,7	Cigar Lake	Eearly hydrothermal muscovites	Altered	105.836	3.20245	3.21804	0.0973439	0.666627	1652.5	18.6	7.87534	35.7106	163.193	62.9299	0.594597	1.91344
Session 4	193 nm	WC-449_537,7_17	WC-449_537,7	Cigar Lake	Eearly hydrothermal muscovites	Altered	86.7549	3.65265	2.69337	0.0861107	0.790095	1606	16.2	8.34558	31.673	141.758	54.6643	0.6301	1.69709
Session 4	193 nm	WC-449_537,7_18	WC-449_537,7	Cigar Lake	Eearly hydrothermal muscovites	Altered	65.6265	1.55333	2.21214	0.0532932	0.601849	1604.7	15.3	9.29437	28.9714	119.425	46.0524	0.701735	1.55234
Session 4	193 nm	WC-449_537,7_19	WC-449_537,7	Cigar Lake	Eearly hydrothermal muscovites	Altered	89.6053	2.94738	2.7806	0.0755047	0.699864	1618.9	16.1	7.47719	29.2964	131.18	50.5854	0.564536	1.56975
Session 4	193 nm	WC-449_537,7_20	WC-449_537,7	Cigar Lake	Eearly hydrothermal muscovites	Altered	128.343	7.005	3.63027	0.155544	0.898459	1603	15.5	6.87486	35.1673	172.756	66.6178	0.51906	1.88433
Session 4	193 nm	WC-449_537,7_21	WC-449_537,7	Cigar Lake	Eearly hydrothermal muscovites	Altered	99.0531	3.49938	2.98764	0.111606	0.809197	1614.1	17.7	6.54206	27.541	126.876	48.9255	0.493932	1.47569
Session 4	193 nm	WC-449_537,7_22	WC-449_537,7	Cigar Lake	Eearly hydrothermal muscovites	Altered	32.6578	0.914807	1.48032	0.0315568	0.509309	1621.7	14.9	15.9568	33.2842	102.03	39.3446	1.20475	1.78343
Session 4	193 nm	WC-449_537,7_23	WC-449_537,7	Cigar Lake	Eearly hydrothermal muscovites	Altered	59.7553	1.78752	2.10123	0.0521437	0.651043	1621.6	15.3	10.7285	31.7649	125.52	48.4025	0.810012	1.70202
Session 4	193 nm	WC-449_537,7_24	WC-449_537,7	Cigar Lake	Eearly hydrothermal muscovites	Altered	48.8139	1.24617	1.82776	0.0396227	0.651545	1601.9	13.1	13.6016	35.0305	129.996	50.1289	1.02694	1.87699
Session 4	193 nm	WC-449_537,7_25	WC-449_537,7	Cigar Lake	Eearly hydrothermal muscovites	Altered	47.1606	1.81433	1.81469	0.0554249	0.806964	1623.5	14.5	12.6947	32.4609	117.219	45.2016	0.958461	1.73931
Session 4	193 nm	WC-449_537,7_26	WC-449_537,7	Cigar Lake	Eearly hydrothermal muscovites	Altered	60.3256	1.86454	2.12869	0.0615603	0.507522	1632.5	20.6	11.0802	33.2352	130.872	50.4666	0.83657	1.7808
Session 4	193 nm	WC-449_537,7_27	WC-449_537,7	Cigar Lake	Eearly hydrothermal muscovites	Altered	157.433	7.22064	4.35625	0.194053	0.897717	1627.8	15.9	4.7023	28.8642	144.945	55.8931	0.355029	1.54659
Session 4	193 nm	WC-449_537,7_28	WC-449_537,7	Cigar Lake	Eearly hydrothermal muscovites	Altered	120.92	3.38797	3.48191	0.105351	0.825262	1612	13.8	6.02273	29.5493	142.589	54.9849	0.454723	1.5833
Session 4	193 nm	WC-449_537,7_29	WC-449_537,7	Cigar Lake	Eearly hydrothermal muscovites	Altered	379.203	20.3211	9.65648	0.55465	0.909291	1661.6	19.8	2.57059	34.9775	190.854	73.5966	0.194083	1.87415
Session 4	193 nm	WC-449_537,7_30	WC-449_537,7	Cigar Lake	Eearly hydrothermal muscovites	Altered	63.8375	2.08844	2.2644	0.0838334	0.715475	1672.5	21.7	8.83727	28.1974	110.456	42.5939	0.667223	1.51086
Session 4	193 nm	WC-449_537,7_31	WC-449_537,7	Cigar Lake	Eearly hydrothermal muscovites	Altered	110.806	3.11563	3.42098	0.111521	0.573781	1695.1	22.5	6.91084	33.3133	149.931	57.8159	0.521776	1.78498
Session 4	193 nm	WC-449_537,7_32	WC-449_537,7	Cigar Lake	Eearly hydrothermal muscovites	Altered	80.9712	2.72995	2.65704	0.0854115	0.438685	1664.8	25.2	9.01725	33.7605	143.02	55.1511	0.68112	1.80976
Session 4	193 nm	WC-449_537,7_33	WC-449_537,7	Cigar Lake	Eearly hydrothermal muscovites	Altered	86.4003	2.65362	2.76334	0.0804765	0.714576	1652.1	16.7	8.56558	33.3525	144.9	55.8759	0.64671	1.78708
Session 4	193 nm	WC-449_537,7_34	WC-449_537,7	Cigar Lake	Eearly hydrothermal muscovites	Altered	109.065	3.47247	3.32619	0.122756	0.726937	1668.7	21	6.85689	32.1374	146.423	56.4631	0.517703	1.72198
Session 4	193 nm	WC-449_537,7_35	WC-449_537,7	Cigar Lake	Eearly hydrothermal muscovites	Altered	69.2691	2.16024	2.40453	0.0698015	0.623481	1680.6	19	10.5898	35.8804	143.624	55.3837	0.799544	1.92253
Session 4	193 nm	WC-449_537,7_36	WC-449_537,7	Cigar Lake	Eearly hydrothermal muscovites	Altered	43.6507	1.63574	1.77174	0.0479025	0.730117	1658.2	15.2	14.9547	37.3349	127.81	49.2859	1.1291	2.00047
Session 4	193 nm	WC-449_537,7_37	WC-449_537,7	Cigar Lake	Eearly hydrothermal muscovites	Altered	83.0122	2.74106	2.68816	0.0760602	0.779664	1654.5	14.6	7.56577	28.6579	122.968	47.4185	0.571224	1.53554
Session 4	193 nm	WC-449_537,7_38	WC-449_537,7	Cigar Lake	Eearly hydrothermal muscovites	Altered	50.5927	1.23386	1.92498	0.058291	0.824744	1650.2	16.2	12.538	34.0087	124.198	47.8928	0.946634	1.82225
Session 4	193 nm	WC-449_537,7_39	WC-449_537,7	Cigar Lake	Eearly hydrothermal muscovites	Altered	46.8209	1.36107	1.82979	0.0439617	0.500745	1643.8	17.4	15.1066	38.9496	138.485	53.4021	1.14056	2.08699
Session 4	193 nm	WC-449_537,7_40	WC-449_537,7	Cigar Lake	Eearly hydrothermal muscovites	Altered	56.7231	1.76899	2.04154	0.0617095	0.517486	1629.4	21.1	12.1738	35.0202	135.202	52.1361	0.919134	1.87644
Session 4	193 nm	WC-449_565,2_1	WF-449_565,2	Cigar Lake	Eearly hydrothermal muscovites	Altered	108.552	4.38125	3.13322	0.0848559	0.802778	1576.5	14.6	10.6831	47.1552	225.733	87.0466	0.801888	2.51249
Session 4	193 nm	WC-449_565,2_2	WF-449_565,2	Cigar Lake	Eearly hydrothermal muscovites	Altered	107.192	4.85045	3.18084	0.0904472	0.877498	1615.7	13.4	10.4062	46.6313	217.127	83.7281	0.781105	2.48457
Session 4	193 nm	WC-449_565,2_3	WF-449_565,2	Cigar Lake	Eearly hydrothermal muscovites	Altered	113.168	3.93868	3.30066	0.0615792	0.68592	1607.6	15.7	8.27407	38.4735	182.265	70.2846	0.621062	2.04991
Session 4	193 nm	WC-449_565,2_4	WF-449_565,2	Cigar Lake	Eearly hydrothermal muscovites	Altered	117.431	3.7213	3.44776	0.0524755	0.580577	1631.2	16.3	7.95089	38.6184	181.743	70.0833	0.596803	2.05763
Session 4	193 nm	WC-449_565,2_5	WF-449_565,2	Cigar Lake	Eearly hydrothermal muscovites	Altered	93.9324	2.69185	2.88176	0.0550651	0.473371	1617.7	16.7	9.70843	39.4137	177.51	68.451	0.728726	2.10001
Session 4	193 nm	WC-449_565,2_6	WF-449_565,2	Cigar Lake	Eearly hydrothermal muscovites	Altered	166.468	5.25628	4.7123	0.089547	0.581872	1678.4	18.1	5.45485	36.2124	176.756	68.1601	0.409447	1.92944
Session 4	193 nm	WC-449_565,2_7	WF-449_565,2	Cigar Lake	Eearly hydrothermal muscovites	Altered	123.63	3.91271	3.63231	0.0660753	0.737573	1649.9	13.8	7.63024	39.0448	183.621	70.8073	0.572735	2.08035
Session 4	193 nm	WC-449_565,2_8	WF-449_565,2	Cigar Lake	Eearly hydrothermal muscovites	Altered	169.076	5.34307	4.71027	0.129173	0.719821	1656.2	16.6	5.54878	36.82	182.615	70.4196	0.416498	1.96182
Session 4	193 nm	WC-449_565,2_9	WF-449_565,2	Cigar Lake	Eearly hydrothermal muscovites	Altered	100.205	2.80077	3.08539	0.0608127	0.534934	1649.5	16.1	9.45577	41.1006	184.437	71.1219	0.709761	2.18989
Session 4	193 nm	WC-449_565,2_10	WF-449_565,2	Cigar Lake	Eearly hydrothermal muscovites	Altered	101.541	2.79148	3.10776	0.0505653	0.543618	1644.9	14.8	9.41933	41.239	186.175	71.7924	0.707026	2.19727
Session 4	193 nm	WC-449_565,2_11	WF-449_565,2	Cigar Lake	Eearly hydrothermal muscovites	Altered	80.158	2.80036	2.62508	0.0545635	0.715964	1653.9	14.4	11.368	42.0403	177.373	68.3982	0.853292	2.23996
Session 4	193 nm	WC-449_565,2_12	WF-449_565,2	Cigar Lake	Eearly hydrothermal muscovites	Altered	167.932	5.68631	4.59465	0.0906842	0.715563	1625.1	16	5.87937	38.0561	192.186	74.1104	0.441312	2.02768
Session 4	193 nm	WC-449_565,2_13	WF-449_565,2	Cigar Lake	Eearly hydrothermal muscovites	Altered	149.148	5.62886	4.24099	0.132473	0.857577	1655.1	13.6	6.33138	37.8274	183.812	70.8811	0.475241	2.01549
Session 4	193 nm	WC-449_565,2_14	WF-449_565,2	Cigar Lake	Eearly hydrothermal muscovites	Altered	151.435	5.02569	4.25637	0.115818	0.726197	1640.6	16.4	6.01757	36.0829	177.381	68.401	0.451686	1.92254
Session 4	193 nm	WC-449_565,2_15	WF-449_565,2	Cigar Lake	Eearly hydrothermal muscovites	Altered	137.015	6.96958	3.9327	0.14352	0.884408	1645	15.6	7.18618	39.8135	191.658	73.9066	0.539403	2.12131
Session 4	193 nm	WC-449_565,2_16	WF-449_565,2	Cigar Lake	Eearly hydrothermal muscovites	Altered	138.041	4.34544	3.89158	0.117512	0.706926	1618.3	17.4	7.08254	38.8289	190.308	73.3859	0.531623	2.06885
Session 4	193 nm	WC-449_565,2_18	WF-449_565,2	Cigar Lake	Eearly hydrothermal muscovites	Altered	116.21	3.7476	3.42815	0.0741206	0.678181	1635.2	15.4	BelowLOD	BelowLOD	#VALUE!	#VALUE!	#VALUE!	#VALUE!
Session 4	193 nm	WC-449_565,2_19	WF-449_565,2	Cigar Lake	Eearly hydrothermal muscovites	Altered	107.925	3.21202	3.21899	0.070439	0.560503	1626.4	16.9	8.1253	39.241	183.799	70.876	0.656717	2.11396
Session 4	193 nm	WC-449_565,2_20	WF-449_565,2	Cigar Lake	Eearly hydrothermal muscovites	Altered	99.1931	3.29302	3.07148	0.0515068	0.429602	1654.7	19.2	8.49281	38.5133	178.415	68.7998	0.693595	2.13037
Session 4	193 nm	WC-449_565,2_21	WF-449_565,2	Cigar Lake	Eearly hydrothermal muscovites	Altered	116.122	3.52626	3.46809	0.0751323	0.620687	1655	16.3	9.43014	40.8044	182.078	70.2125	0.604642	2.09695
Session 4	193 nm	WC-449_565,2_22	WF-449_565,2	Cigar Lake	Eearly hydrothermal muscovites	Altered	212.983	8.33165	5.74066	0.164424	0.747099	1656.9	18.7	7.48106	36.5506	169.098	65.2071	0.306162	1.75757
Session 4	193 nm	WC-449_565,2_23	WF-449_565,2	Cigar Lake	Eearly hydrothermal muscovites	Altered	111.208	3.6056	3.3947	0.0733931	0.583438	1675.3	17.9	4.885	39.5064	202.52	78.0951	0.702241	2.3839
Session 4	193 nm	WC-449_565,2_24	WF-449_565,2	Cigar Lake	Eearly hydrothermal muscovites	Altered	109.276	3.69851	3.33372	0.0748806	0.806025	1667.7	12.8	7.78434	37.2276	168.507	64.9793	0.594634	1.98234
Session 4	193 nm	WC-449_565,2_25	WF-449_565,2	Cigar Lake	Eearly hydrothermal muscovites	Altered	119.92	3.53401	3.59299	0.0805557	0.605849	1671.6	16.8	7.57494	35.5753	161.125	62.1325	0.518118	1.86159
Session 4	193 nm	WC-449_565,2_26	WF-449_565,2	Cigar Lake	Eearly hydrothermal muscovites	Altered	227.315	8.32551	5.88255	0.191452	0.767101	1604.7	17.5	7.14719	36.1769	166.834	64.334	0.283017	1.66486
Session 4	193 nm	WC-449_565,2_27	WF-449_565,2	Cigar Lake	Eearly hydrothermal muscovites	Altered	202.143	7.24748	5.4196	0.190816	0.829318	1636.8	16	4.69767	38.9304	207.86	80.1542	0.396522	2.14899
Session 4	193 nm	WC-449_565,2_28	WF-449_565,2	Cigar Lake	Eearly hydrothermal muscovites	Altered	155.029	4.77449	4.38649	0.107295	0.802387	1658.1	12.9	5.4461	41.5808	214.291	82.6341	0.533024	2.3381
Session 4	193 nm	WC-449_565,2_29	WF-449_565,2	Cigar Lake	Eearly hydrothermal muscovites	Altered	157.486	4.5767	4.48393	0.102605	0.705661	1672.8	14.9	6.95534	42.981	209.889	80.9369	0.513932	2.30444
Session 4	193 nm	WC-449_565,2_30	WF-449_565,2	Cigar Lake	Eearly hydrothermal muscovites	Altered	266.67	12.3685	6.93452	0.239701	0.85846	1642	17.2	6.88099	43.4662	210.936	81.3406	0.305023	2.11519
Session 4	193 nm	WC-449_565,2_31	WF-449_565,2	Cigar Lake	Eearly hydrothermal muscovites	Altered	126.578	4.95979	3.62291	0.119682	0.87331	1615.4	13	2.83636	27.7088	147.229	56.7742	0.448533	1.62499
Session 4	193 nm	WC-449_565,2_32	WF-449_565,2	Cigar Lake	Eearly hydrothermal muscovites	Altered	108.2	3.22622	3.26552	0.0684766	0.448254	1646.4	18.8	7.34839	37.5052	181.054	69.8176	0.645263	2.10712
Session 4	193 nm	WC-449_565,2_33	WF-449_565,2	Cigar Lake	Eearly hydrothermal muscovites	Altered	124.124	4.02261	3.59444	0.0825705	0.744701	1627.8	14.2	8.79095	40.4417	185.15	71.3969	0.575208	2.06755
Session 4	193 nm	WC-449_565,2_34	WF-449_565,2	Cigar Lake	Eearly hydrothermal muscovites	Altered	162.239	5.09993	4.4524	0.11681	0.6808	1621	16.8	6.64834	33.6655	160.63	61.9416	0.381793	1.69989
Session 4	193 nm	WC-449_565,2_35	WF-449_565,2	Cigar Lake	Eearly hydrothermal muscovites	Altered	122.458	3.72343	3.58272	0.0818169	0.461711	1639.8	19.8	5.62932	35.3094	177.775	68.5529	0.559809	2.00564
Session 4	193 nm	WC-449_565,2_36	WF-449_565,2	Cigar Lake	Eearly hydrothermal muscovites	Altered	132.692	4.53638	3.65253	0.0869582	0.614143	1568.7	17.7	7.30484	36.8692	174.123	67.1448	0.506019	1.84825
Session 4	193 nm	WC-449_565,2_37	WF-449_565,2	Cigar Lake	Eearly hydrothermal muscovites	Altered	188.59	6.70542	4.94435	0.174735	0.845219	1585.6	14.8	7.68171	39.5269	198.41	76.5101	0.405696	2.0059
Session 4	193 nm	WC-449_565,2_38	WF-449_565,2	Cigar Lake	Eearly hydrothermal muscovites	Altered	106.9	3.394	3.21247	0.0703119	0.635543	1634.9	16.1	5.58723	38.9177	205.104	79.0915	0.739863	2.37679
Session 4	193 nm	WC-449_565,2_39	WF-449_565,2	Cigar Lake	Eearly hydrothermal muscovites	Altered	102.518	3.22763	3.01342	0.0569213	0.361666	1584.1	19.2	9.57222	43.3204	199.182	76.8081	0.749216	2.2577
Session 4	193 nm	WC-449_565,2_40	WF-449_565,2	Cigar Lake	Eearly hydrothermal muscovites	Altered	158.748	6.3058	4.23583	0.113427	0.87713	1570.9	12.4	9.92378	42.1287	198.032	76.3646	0.481042	2.03761
Session 4	193 nm	WC-449_434,4_1	WF-449_434,4	Cigar Lake	Eearly hydrothermal muscovites	Altered	420.229	24.074	9.9285	0.453397	0.936675	1556.1	14.7	3.25335	45.5001	265.604	102.422	0.243728	2.41986
Session 4	193 nm	WC-449_434,4_2	WF-449_434,4	Cigar Lake	Eearly hydrothermal muscovites	Altered	419.843	18.0258	10.2588	0.381344	0.875322	1608.6	15.5	3.45334	49.9038	281.672	108.618	0.25871	2.65406
Session 4	193 nm	WC-449_434,4_3	WF-449_434,4	Cigar Lake	Eearly hydrothermal muscovites	Altered	443.739	18.7719	11.0624	0.390332	0.832244	1646.9	17.9	2.41372	37.6128	208.081	80.2398	0.180827	2.00038
Session 4	193 nm	WC-449_434,4_4	WF-449_434,4	Cigar Lake	Eearly hydrothermal muscovites	Altered	363.468	15.6081	9.04129	0.30119	0.821187	1619.9	18.1	3.42072	43.5658	241.547	93.1448	0.256267	2.31698
Session 4	193 nm	WC-449_434,4_5	WF-449_434,4	Cigar Lake	Eearly hydrothermal muscovites	Altered	436.357	17.8091	10.8885	0.382574	0.841701	1646.6	16.9	3.12633	47.9515	265.03	102.2	0.234212	2.55023
Session 4	193 nm	WC-449_434,4_6	WF-449_434,4	Cigar Lake	Eearly hydrothermal muscovites	Altered	475.297	23.7908	11.6196	0.486655	0.874295	1622.5	18.3	3.15908	51.7071	291.705	112.486	0.236666	2.74996
Session 4	193 nm	WC-449_434,4_7	WF-449_434,4	Cigar Lake	Eearly hydrothermal muscovites	Altered	394.166	16.7807	10.0074	0.349665	0.820784	1663.2	18.6	3.76249	53.0389	288.12	111.104	0.281871	2.82079
Session 4	193 nm	WC-449_434,4_8	WF-449_434,4	Cigar Lake	Eearly hydrothermal muscovites	Altered	390.22	17.5627	9.87255	0.389768	0.880131	1656.2	16.3	3.82039	53.1294	289.625	111.684	0.286209	2.82561
Session 4	193 nm	WC-449_434,4_9	WF-449_434,4	Cigar Lake	Eearly hydrothermal muscovites	Altered	449.527	21.1118	11.2568	0.437255	0.859234	1655.6	18.4	2.61828	41.5172	228.661	88.1755	0.196152	2.20803
Session 4	193 nm	WC-449_434,4_10	WF-449_434,4	Cigar Lake	Eearly hydrothermal muscovites	Altered	476.862	20.3877	11.9876	0.428103	0.764648	1668.2	21.7	2.85228	48.1639	264.243	101.896	0.213681	2.56152
Session 4	193 nm	WC-449_434,4_11	WF-449_434,4	Cigar Lake	Eearly hydrothermal muscovites	Altered	277.44	15.7356	7.12745	0.321618	0.915325	1632.5	16.6	4.09286	41.0922	220.604	85.0689	0.306621	2.18543
Session 4	193 nm	WC-449_434,4_12	WF-449_434,4	Cigar Lake	Eearly hydrothermal muscovites	Altered	318.584	14.4346	8.12164	0.302862	0.867526	1641.5	16.7	3.91999	44.8463	242.621	93.5587	0.293671	2.38509
Session 4	193 nm	WC-449_434,4_13	WF-449_434,4	Cigar Lake	Eearly hydrothermal muscovites	Altered	367.144	22.3919	9.26954	0.442381	0.820681	1645.2	26.1	3.82727	49.9741	272.988	105.269	0.286724	2.6578
Session 4	193 nm	WC-449_434,4_14	WF-449_434,4	Cigar Lake	Eearly hydrothermal muscovites	Altered	348.457	16.2112	8.61172	0.264789	0.88011	1604.1	16.9	3.91961	47.5478	265.344	102.321	0.293641	2.52876
Session 4	193 nm	WC-449_434,4_15	WF-449_434,4	Cigar Lake	Eearly hydrothermal muscovites	Altered	388.084	17.0387	9.45355	0.35816	0.850824	1594.7	17	3.17231	42.2444	239.177	92.2308	0.237657	2.2467
Session 4	193 nm	WC-449_434,4_16	WF-449_434,4	Cigar Lake	Eearly hydrothermal muscovites	Altered	197.836	11.5329	5.33948	0.311019	0.915257	1647.3	19.3	6.74228	50.7111	259.137	99.9277	0.505105	2.69699
Session 4	193 nm	WC-449_434,4_17	WF-449_434,4	Cigar Lake	Eearly hydrothermal muscovites	Altered	210.993	12.2347	5.47484	0.270412	0.906908	1598	17	6.80518	52.4818	278.949	107.568	0.509817	2.79117
Session 4	193 nm	WC-449_434,4_18	WF-449_434,4	Cigar Lake	Eearly hydrothermal muscovites	Altered	48.9631	5.8564	1.83385	0.15635	0.968933	1613.1	18.5	25.5656	66.0416	243.188	93.7777	1.91527	3.51233
Session 4	193 nm	WC-449_434,4_19	WF-449_434,4	Cigar Lake	Eearly hydrothermal muscovites	Altered	293.685	13.9012	7.5014	0.230579	0.87495	1632.3	17.5	3.82685	40.4373	218.344	84.1973	0.286693	2.1506
Session 4	193 nm	WC-449_434,4_20	WF-449_434,4	Cigar Lake	Eearly hydrothermal muscovites	Altered	62.7466	2.30333	2.22872	0.0417329	0.579927	1673	16.9	14.8037	46.4755	180.459	69.5881	1.10903	2.47173
Session 4	193 nm	WC-449_434,4_21	WF-449_434,4	Cigar Lake	Eearly hydrothermal muscovites	Altered	396.698	22.4687	9.63506	0.455828	0.931085	1592.6	15.1	3.57358	48.5016	275.412	106.203	0.267719	2.57949
Session 4	193 nm	WC-449_434,4_22	WF-449_434,4	Cigar Lake	Eearly hydrothermal muscovites	Altered	402.326	15.846	9.64053	0.275882	0.731479	1573.1	19.4	3.16066	42.9216	247.044	95.2644	0.236784	2.28272
Session 4	193 nm	WC-449_434,4_23	WF-449_434,4	Cigar Lake	Eearly hydrothermal muscovites	Altered	200.343	14.2121	5.30463	0.287891	0.950298	1619.2	15.6	7.04104	52.6126	274.049	105.678	0.527487	2.79812
Session 4	193 nm	WC-449_434,4_24	WF-449_434,4	Cigar Lake	Eearly hydrothermal muscovites	Altered	414.434	18.9432	9.88607	0.379889	0.88617	1569.4	15.3	3.10894	43.2946	250.315	96.5256	0.23291	2.30256
Session 4	193 nm	WC-449_434,4_25	WF-449_434,4	Cigar Lake	Eearly hydrothermal muscovites	Altered	312.302	22.6998	7.90483	0.633841	0.957783	1627	20.5	5.83217	64.9413	353.853	136.452	0.436923	3.45381
Session 4	193 nm	WC-449_434,4_26	WF-449_434,4	Cigar Lake	Eearly hydrothermal muscovites	Altered	402.076	17.0956	9.93411	0.430168	0.876995	1621.4	16.7	3.97896	55.6797	307.981	118.763	0.295374	2.93428
Session 4	193 nm	WC-449_434,4_27	WF-449_434,4	Cigar Lake	Eearly hydrothermal muscovites	Altered	317.049	12.4289	8.23906	0.347125	0.914236	1672.2	14.3	3.43734	39.8931	211.723	81.644	0.257512	2.12166
Session 4	193 nm	WC-449_434,4_28	WF-449_434,4	Cigar Lake	Eearly hydrothermal muscovites	Altered	346.603	25.0686	9.08654	0.811894	0.96777	1699.7	25.4	2.79913	35.8278	188.484	72.6826	0.2097	1.90545
Session 4	193 nm	WC-449_434,4_29	WF-449_434,4	Cigar Lake	Eearly hydrothermal muscovites	Altered	150.297	7.88041	4.03047	0.210011	0.873428	1569.5	19.8	6.07315	34.4801	177.33	68.3815	0.454976	1.83377
Session 4	193 nm	WC-449_434,4_30	WF-449_434,4	Cigar Lake	Eearly hydrothermal muscovites	Altered	164.661	9.36478	4.51911	0.275581	0.965988	1630.2	15.6	6.99776	44.5461	223.856	86.3226	0.524245	2.36912
Session 4	193 nm	WC-449_434,4_31	WF-449_434,4	Cigar Lake	Eearly hydrothermal muscovites	Altered	347.632	15.4892	8.78859	0.443639	0.865856	1640.2	20.6	4.53095	56.0927	306.004	118	0.339441	2.98321
Session 4	193 nm	WC-449_434,4_32	WF-449_434,4	Cigar Lake	Eearly hydrothermal muscovites	Altered	368.133	18.8607	9.32619	0.434869	0.932244	1651.1	14.1	4.96421	65.2157	355.036	136.908	0.371899	3.4684
Session 4	193 nm	WC-449_434,4_33	WF-449_434,4	Cigar Lake	Eearly hydrothermal muscovites	Altered	372.005	21.637	9.65208	0.593044	0.909989	1691.9	21.4	1.92702	26.2002	139.268	53.7043	0.144364	1.39342
Session 4	193 nm	WC-449_434,4_34	WF-449_434,4	Cigar Lake	Eearly hydrothermal muscovites	Altered	443.113	27.4438	11.2839	0.588425	0.966539	1681.7	12.7	3.53778	56.2327	304.554	117.441	0.265037	2.99065
Session 4	193 nm	WC-449_434,4_35	WF-449_434,4	Cigar Lake	Eearly hydrothermal muscovites	Altered	445.968	27.0777	10.6964	0.521958	0.906083	1585.7	18.9	3.3402	50.3276	289.397	111.596	0.250234	2.6766
Session 4	193 nm	WC-449_434,4_36	WF-449_434,4	Cigar Lake	Eearly hydrothermal muscovites	Altered	314.649	12.7808	7.92053	0.30446	0.844274	1619.3	16.9	4.97118	55.464	303.882	117.182	0.372421	2.94977
Session 4	193 nm	WC-449_434,4_37	WF-449_434,4	Cigar Lake	Eearly hydrothermal muscovites	Altered	294.978	14.1425	7.48383	0.27733	0.878187	1622.2	16.6	5.94021	62.6216	340.416	131.27	0.445017	3.33043
Session 4	193 nm	WC-449_434,4_38	WF-449_434,4	Cigar Lake	Eearly hydrothermal muscovites	Altered	341.916	17.6883	8.84533	0.40727	0.918986	1675.6	15.6	4.13763	51.5541	274.846	105.985	0.309975	2.74183
Session 4	193 nm	WC-449_434,4_39	WF-449_434,4	Cigar Lake	Eearly hydrothermal muscovites	Altered	292.495	9.89825	7.52079	0.171911	0.853887	1642.4	13.2	4.84457	51.3236	275.292	106.157	0.362936	2.72957
Session 4	193 nm	WC-449_434,4_40	WF-449_434,4	Cigar Lake	Eearly hydrothermal muscovites	Altered	336.371	12.1789	8.55963	0.266849	0.820459	1646.3	15.7	4.51208	54.4039	294.859	113.703	0.338027	2.89339
Session 4	193 nm	WC-449_402,8_28	WC-449_402,8	Cigar Lake	Metamorphic muscovites	Altered	88.2545	4.56899	2.79211	0.0607086	0.806987	1637.5	19.5	20.0996	79.0855	347.672	134.068	1.51911	4.24153
Session 4	193 nm	WC-449_402,8_29	WC-449_402,8	Cigar Lake	Metamorphic muscovites	Altered	116.215	6.10587	3.56148	0.0856294	0.70564	1695	24.7	16.3807	82.2128	373.112	143.878	1.23804	4.40925
Session 4	193 nm	WC-449_402,8_30	WC-449_402,8	Cigar Lake	Metamorphic muscovites	Altered	165.509	8.04062	4.5572	0.111003	0.78283	1629.4	21.2	9.32959	59.9151	302.642	116.704	0.70512	3.21337
Session 4	193 nm	WC-449_402,8_31	WC-449_402,8	Cigar Lake	Metamorphic muscovites	Altered	795.873	64.9259	19.5181	1.3956	0.948644	1667	20.6	3.10353	85.3628	484.11	186.681	0.234562	4.57819
Session 4	193 nm	WC-449_402,8_32	WC-449_402,8	Cigar Lake	Metamorphic muscovites	Altered	905.163	73.8536	21.1679	1.53146	0.951785	1598	19.2	2.28458	68.1491	405.301	156.291	0.172666	3.65498
Session 4	193 nm	WC-449_402,8_33	WC-449_402,8	Cigar Lake	Metamorphic muscovites	Altered	840.021	50.8192	20.8532	0.966464	0.930984	1690.6	18.9	2.60461	76.5403	428.821	165.361	0.196853	4.10502
Session 4	193 nm	WC-449_402,8_34	WC-449_402,8	Cigar Lake	Metamorphic muscovites	Altered	1302.66	97.5771	30.2336	1.95495	0.964488	1602.7	16	1.65551	70.5337	422.675	162.991	0.125122	3.78287
Session 4	193 nm	WC-449_402,8_35	WC-449_402,8	Cigar Lake	Metamorphic muscovites	Altered	1232.92	79.4443	29.604	1.86308	0.925985	1655.2	19.8	1.78829	74.6042	432.131	166.637	0.135157	4.00119
Session 4	193 nm	WC-449_402,8_36	WC-449_402,8	Cigar Lake	Metamorphic muscovites	Altered	1884.11	145.124	45.5219	2.76852	0.942051	1680.1	22.8	1.26915	81.4159	468.665	180.725	0.095921	4.36651
Session 4	193 nm	WC-449_402,8_37	WC-449_402,8	Cigar Lake	Metamorphic muscovites	Altered	125.404	6.13981	3.60292	0.085082	0.55747	1615.8	25.9	14.0542	71.3374	351.037	135.366	1.07944	3.88913
Session 4	193 nm	WC-449_402,8_38	WC-449_402,8	Cigar Lake	Metamorphic muscovites	Altered	166.506	8.29653	4.58371	0.140225	0.837647	1630.7	18.7	10.4462	67.4763	340.904	131.458	0.789513	3.6189
Session 4	193 nm	WC-449_402,8_39	WC-449_402,8	Cigar Lake	Metamorphic muscovites	Altered	189.304	8.76405	5.20549	0.121777	0.42136	1661.1	29.9	7.61684	55.8743	282.604	108.977	0.575673	2.99666
Session 4	193 nm	WC-449_402,8_40	WC-449_402,8	Cigar Lake	Metamorphic muscovites	Altered	180.964	9.33806	5.06934	0.140567	0.803015	1680.6	22.5	7.04803	50.3494	249.98	96.3965	0.532682	2.70035
Session 5	193 nm	WF-100_543,0_1	WF-100_543	Waterfound	Eearly hydrothermal muscovites	Altered	129.413	5.95982	3.75752	0.0848323	0.521993	1760.2	29.3	10.3003	54.5255	275.046	106.063	0.819569	3.07954
Session 5	193 nm	WF-100_543,0_2	WF-100_543	Waterfound	Eearly hydrothermal muscovites	Altered	116.169	4.94572	3.47804	0.0756151	0.334025	1785.7	31.1	11.6584	57.1251	279.455	107.763	0.927637	3.22636
Session 5	193 nm	WF-100_543,0_3	WF-100_544	Waterfound	Eearly hydrothermal muscovites	Preserved	127.91	6.03166	3.84563	0.0931551	0.483613	1818.8	32	10.3922	56.3024	274.28	105.767	0.826886	3.1799
Session 5	193 nm	WF-100_543,0_4	WF-100_545	Waterfound	Eearly hydrothermal muscovites	Preserved	132.755	6.02833	3.94909	0.0733069	0.198275	1809.2	35.6	10.7182	59.6309	293.599	113.217	0.852825	3.36789
Session 5	193 nm	WF-100_543,0_5	WF-100_546	Waterfound	Eearly hydrothermal muscovites	Altered	126.964	5.99272	3.79023	0.0793197	0.47822	1804.2	31.6	10.5645	56.4114	276.765	106.725	0.840595	3.18605
Session 5	193 nm	WF-100_543,0_6	WF-100_547	Waterfound	Eearly hydrothermal muscovites	Altered	112.173	5.61209	3.43043	0.0688062	0.395091	1813.5	34.7	11.6786	56.4404	270.309	104.236	0.92924	3.18769
Session 5	193 nm	WF-100_543,0_7	WF-100_548	Waterfound	Eearly hydrothermal muscovites	Altered	131.231	6.19671	3.87784	0.0799704	0.600787	1794.5	28.9	10.0557	54.9355	272.29	105	0.800111	3.1027
Session 5	193 nm	WF-100_543,0_8	WF-100_549	Waterfound	Eearly hydrothermal muscovites	Preserved	123.461	6.16849	3.73743	0.0789355	0.351497	1821.9	36.3	10.7936	56.8317	274.964	106.031	0.858823	3.20979
Session 5	193 nm	WF-100_543,0_9	WF-100_550	Waterfound	Eearly hydrothermal muscovites	Altered	121.227	5.83679	3.64484	0.0838093	0.329462	1804.8	35.4	10.5646	54.2479	264.261	101.904	0.840604	3.06386
Session 5	193 nm	WF-100_543,0_10	WF-100_551	Waterfound	Eearly hydrothermal muscovites	Altered	124.821	5.84959	3.7194	0.0698098	0.650731	1796.5	27.7	10.1456	53.1622	261.306	100.764	0.807266	3.00255
Session 5	193 nm	WF-100_543,0_11	WF-100_552	Waterfound	Eearly hydrothermal muscovites	Preserved	119.004	5.34233	3.65584	0.0722009	0.242888	1838.4	34.8	10.7585	55.4102	264.176	101.871	0.85603	3.12951
Session 5	193 nm	WF-100_543,0_12	WF-100_553	Waterfound	Eearly hydrothermal muscovites	Preserved	127.754	5.42539	3.86198	0.0658103	0.504922	1828.3	28.3	10.578	57.5525	278.842	107.526	0.841668	3.2505
Session 5	193 nm	WF-100_543,0_13	WF-100_554	Waterfound	Eearly hydrothermal muscovites	Altered	114.596	4.97259	3.49942	0.0772948	0.441242	1817	29.9	10.9632	54.0488	259.231	99.964	0.87232	3.05261
Session 5	193 nm	WF-100_543,0_14	WF-100_555	Waterfound	Eearly hydrothermal muscovites	Altered	121.771	5.78445	3.60786	0.0784586	0.448184	1780	31.9	10.9315	55.0637	274.665	105.916	0.869795	3.1381
Session 5	193 nm	WF-100_543,0_15	WF-100_556	Waterfound	Eearly hydrothermal muscovites	Altered	139.983	6.76109	4.00167	0.095423	0.332465	1751.9	35.2	9.6235	54.2532	277.965	107.188	0.765721	3.06416
Session 5	193 nm	WF-100_543,0_16	WF-100_557	Waterfound	Eearly hydrothermal muscovites	Preserved	125.118	6.0143	3.80189	0.0709498	0.563399	1832.2	30.9	10.4853	56.1606	270.696	104.385	0.834294	3.17189
Session 5	193 nm	WF-100_543,0_17	WF-100_558	Waterfound	Eearly hydrothermal muscovites	Preserved	124.718	5.71857	3.82756	0.0659146	0.313391	1849.4	34.2	10.6815	57.5977	274.878	105.998	0.849904	3.25306
Session 5	193 nm	WF-100_543,0_18	WF-100_559	Waterfound	Eearly hydrothermal muscovites	Altered	127.815	7.21117	3.80004	0.0803633	0.725841	1798.7	32	10.3427	55.37	272.772	105.185	0.822949	3.12723
Session 5	193 nm	WF-100_543,0_19	WF-100_560	Waterfound	Eearly hydrothermal muscovites	Altered	124.155	6.74544	3.72862	0.063485	0.121916	1809.1	42.3	10.9025	57.2696	279.3	107.703	0.867486	3.23452
Session 5	193 nm	WF-100_543,0_20	WF-100_561	Waterfound	Eearly hydrothermal muscovites	Altered	121.623	5.69408	3.64165	0.070111	0.387148	1798.3	32.7	10.5931	54.3468	265.84	102.512	0.842873	3.06945
Session 5	193 nm	WF-100_543,0_21	WF-100_562	Waterfound	Eearly hydrothermal muscovites	Altered	120.419	5.23362	3.55907	0.064795	0.229562	1772.7	32.6	10.3062	51.6757	256.081	98.7491	0.820042	2.91858
Session 5	193 nm	WF-100_543,0_22	WF-100_563	Waterfound	Eearly hydrothermal muscovites	Altered	117.526	5.57849	3.51676	0.0696398	0.647899	1787.9	27.5	10.4254	51.652	252.818	97.4911	0.829527	2.91725
Session 5	193 nm	WF-100_543,0_23	WF-100_564	Waterfound	Eearly hydrothermal muscovites	Altered	129.399	5.63582	3.80015	0.0644183	0.452507	1780.1	29.3	9.69954	51.9281	258.978	99.8663	0.771771	2.93284
Session 5	193 nm	WF-100_543,0_24	WF-100_565	Waterfound	Eearly hydrothermal muscovites	Altered	119.501	5.67994	3.57883	0.0794985	0.51581	1793.9	30.6	10.0351	50.5956	247.442	95.4181	0.79847	2.85759
Session 5	193 nm	WF-100_543,0_25	WF-100_566	Waterfound	Eearly hydrothermal muscovites	Altered	105.221	7.57891	3.19612	0.185854	0.921343	1782.7	20.6	11.6717	52.5544	253.406	97.7178	0.928692	2.96821
Session 5	193 nm	WF-100_543,0_38	WF-100_579	Waterfound	Eearly hydrothermal muscovites	Altered	66.1419	3.36221	2.26432	0.0475306	0.378568	1825.6	32.5	15.8134	50.4446	215.816	83.2223	1.25824	2.84906
Session 5	193 nm	WF-100_543,0_39	WF-100_580	Waterfound	Eearly hydrothermal muscovites	Altered	112.414	5.66106	3.3563	0.0886457	0.409891	1771.7	34.7	10.1812	48.1405	236.157	91.0661	0.810097	2.71892
Session 5	193 nm	WF-100_543,0_40	WF-100_581	Waterfound	Eearly hydrothermal muscovites	Altered	97.7241	4.63405	3.03797	0.0588823	0.263468	1800.8	34.3	11.5138	49.2782	232.168	89.528	0.91613	2.78318
Session 5	193 nm	WF-98_585,5_26	WF-98_585,5	Waterfound	Eearly hydrothermal muscovites	Altered	311.86	8.53599	8.22372	0.2113	0.759221	1693.2	14.7	5.29364	61.3105	332.064	128.05	0.410601	3.37666
Session 5	193 nm	WF-98_585,5_27	WF-98_585,5	Waterfound	Eearly hydrothermal muscovites	Preserved	302.924	7.70791	8.2036	0.151873	0.623781	1733.7	15.8	5.71827	66.0665	348.423	134.358	0.443537	3.6386
Session 5	193 nm	WF-98_585,5_28	WF-98_585,5	Waterfound	Eearly hydrothermal muscovites	Preserved	297.01	9.17599	8.03871	0.171473	0.853814	1729.5	12.6	5.53897	62.7087	330.91	127.604	0.42963	3.45367
Session 5	193 nm	WF-98_585,5_29	WF-98_585,5	Waterfound	Eearly hydrothermal muscovites	Preserved	294.098	9.19921	7.93745	0.149663	0.734053	1723	16.4	6.16779	68.9482	364.863	140.698	0.478404	3.79731
Session 5	193 nm	WF-98_585,5_30	WF-98_585,5	Waterfound	Eearly hydrothermal muscovites	Preserved	289.302	8.67817	7.94758	0.162545	0.780134	1750.7	14.6	6.4472	72.1636	375.173	144.673	0.500077	3.9744
Session 5	193 nm	WF-98_585,5_31	WF-98_585,5	Waterfound	Eearly hydrothermal muscovites	Altered	329.925	10.8229	8.66029	0.216371	0.733018	1694	17.2	5.50081	67.092	365.049	140.769	0.42667	3.69508
Session 5	193 nm	WF-98_585,5_32	WF-98_585,5	Waterfound	Eearly hydrothermal muscovites	Preserved	285.305	8.34999	7.77491	0.152712	0.635729	1734.4	17.6	5.93479	64.985	340.583	131.335	0.460331	3.57904
Session 5	193 nm	WF-98_585,5_33	WF-98_585,5	Waterfound	Eearly hydrothermal muscovites	Preserved	266.199	7.23885	7.49492	0.13779	0.401445	1778.7	21	6.53477	68.9778	349.901	134.928	0.506869	3.79894
Session 5	193 nm	WF-98_585,5_34	WF-98_585,5	Waterfound	Eearly hydrothermal muscovites	Preserved	269.219	7.95762	7.45718	0.146454	0.684602	1752.3	16.7	6.03166	63.3466	326.626	125.953	0.467845	3.48881
Session 5	193 nm	WF-98_585,5_35	WF-98_585,5	Waterfound	Eearly hydrothermal muscovites	Preserved	291.289	7.53474	7.89292	0.157496	0.562564	1728.2	17.5	6.037	67.1075	353.716	136.399	0.468259	3.69593
Session 5	193 nm	WF-98_585,5_36	WF-98_585,5	Waterfound	Eearly hydrothermal muscovites	Preserved	293.501	5.92476	7.91964	0.155377	0.365338	1722.3	18.2	5.82688	64.9911	343.997	132.651	0.451962	3.57937
Session 5	193 nm	WF-98_585,5_37	WF-98_585,5	Waterfound	Eearly hydrothermal muscovites	Altered	308.926	13.4602	8.12562	0.235037	0.442887	1687.5	31	5.35113	61.2371	332.513	128.223	0.41506	3.37262
Session 5	193 nm	WF-98_585,5_38	WF-98_585,5	Waterfound	Eearly hydrothermal muscovites	Preserved	253.771	7.21428	7.07086	0.162158	0.586452	1751.4	19	6.15422	61.2855	311.095	119.964	0.472725	3.34257
Session 5	193 nm	WF-98_585,5_39	WF-98_585,5	Waterfound	Eearly hydrothermal muscovites	Preserved	262.428	6.91724	7.16879	0.148533	0.617321	1723.8	16.6	6.02547	60.8344	318.06	122.649	0.467365	3.35044
Session 5	193 nm	WF-98_585,5_40	WF-98_585,5	Waterfound	Eearly hydrothermal muscovites	Preserved	290.206	7.9878	8.08628	0.139367	0.769539	1775.9	14	5.70792	64.3597	333.191	128.484	0.442734	3.58008
Session 5	193 nm	WF-98_628,7_1	WF-98_628,7	Waterfound	Eearly hydrothermal muscovites	Altered	482.964	15.1995	11.516	0.397838	0.830009	1594.82	15.22	3.85049	62.4619	367.58	141.745	0.293491	3.37984
Session 5	193 nm	WF-98_628,7_2	WF-98_628,7	Waterfound	Eearly hydrothermal muscovites	Altered	383.58	13.807	9.41914	0.277174	0.83669	1619.05	14.74	4.60429	61.0901	346.238	133.515	0.348077	3.27859
Session 5	193 nm	WF-98_628,7_3	WF-98_628,7	Waterfound	Eearly hydrothermal muscovites	Altered	313.799	14.1351	7.76415	0.339913	0.893709	1607.08	15.71	5.28754	57.8288	325.283	125.435	0.399729	3.10356
Session 5	193 nm	WF-98_628,7_4	WF-98_628,7	Waterfound	Eearly hydrothermal muscovites	Altered	327.937	11.1494	8.26127	0.244438	0.848356	1641.68	13.68	5.07187	59.0217	326.073	125.739	0.383425	3.16757
Session 5	193 nm	WF-98_628,7_5	WF-98_628,7	Waterfound	Eearly hydrothermal muscovites	Altered	388.887	14.7122	9.6619	0.2923	0.888334	1639.4	13.16	4.2221	57.463	321.89	124.126	0.319184	3.08392
Session 5	193 nm	WF-98_628,7_6	WF-98_628,7	Waterfound	Eearly hydrothermal muscovites	Altered	197.924	12.1991	5.16262	0.227364	0.905076	1616.3	18.74	8.25186	60.0094	320.188	123.47	0.623827	3.22058
Session 5	193 nm	WF-98_628,7_8	WF-98_628,7	Waterfound	Eearly hydrothermal muscovites	Altered	178.58	7.49932	4.54593	0.160401	0.900424	1557.07	12.32	8.20887	52.5658	287.391	110.823	0.620577	2.8211
Session 5	193 nm	WF-98_628,7_9	WF-98_628,7	Waterfound	Eearly hydrothermal muscovites	Altered	331.722	14.1376	8.3304	0.288857	0.816637	1638.04	18.48	4.52898	53.1451	294.531	113.576	0.342384	2.85219
Session 5	193 nm	WF-98_628,7_10	WF-98_628,7	Waterfound	Eearly hydrothermal muscovites	Altered	393.765	13.603	9.21132	0.26532	0.90164	1545.89	10.67	4.52454	58.7074	349.275	134.686	0.342048	3.15071
Session 5	193 nm	WF-98_628,7_11	WF-98_628,7	Waterfound	Eearly hydrothermal muscovites	Altered	450.919	16.3288	10.3241	0.355292	0.8448	1526.13	14.41	4.27962	62.2381	378.321	145.887	0.323533	3.34019
Session 5	193 nm	WF-98_628,7_12	WF-98_628,7	Waterfound	Eearly hydrothermal muscovites	Altered	361.321	13.8038	8.56023	0.2258	0.843418	1556.2	14.91	4.58944	55.3404	325.094	125.362	0.346955	2.97001
Session 5	193 nm	WF-98_628,7_13	WF-98_628,7	Waterfound	Eearly hydrothermal muscovites	Altered	343.422	12.7985	8.44449	0.279203	0.880185	1608.52	13.18	4.62869	55.059	311.632	120.171	0.349922	2.95491
Session 5	193 nm	WF-98_628,7_14	WF-98_628,7	Waterfound	Eearly hydrothermal muscovites	Altered	309.521	12.6225	7.83164	0.216411	0.84975	1641.2	16.34	5.19658	57.3281	315.329	121.596	0.392853	3.07668
Session 5	193 nm	WF-98_628,7_15	WF-98_628,7	Waterfound	Eearly hydrothermal muscovites	Altered	294.316	9.32639	7.28241	0.14664	0.629153	1598.55	17.84	4.85963	49.8511	280.396	108.126	0.36738	2.67541
Session 5	193 nm	WF-98_628,7_16	WF-98_628,7	Waterfound	Eearly hydrothermal muscovites	Altered	403.053	13.0229	9.52994	0.212507	0.748898	1564.7	15.49	3.92842	52.7357	310.41	119.699	0.296982	2.83022
Session 5	193 nm	WF-98_628,7_17	WF-98_628,7	Waterfound	Eearly hydrothermal muscovites	Altered	436.211	14.0519	10.6535	0.288563	0.860055	1623.59	12.42	3.85752	57.889	329.883	127.209	0.291622	3.10679
Session 5	193 nm	WF-98_628,7_18	WF-98_628,7	Waterfound	Eearly hydrothermal muscovites	Altered	333.716	13.0793	8.37503	0.247938	0.866538	1637.75	14.67	4.9865	58.8274	326.234	125.801	0.376972	3.15715
Session 5	193 nm	WF-98_628,7_19	WF-98_628,7	Waterfound	Eearly hydrothermal muscovites	Altered	342.233	13.2816	8.48355	0.255205	0.873146	1621.01	14.04	4.81472	57.5367	323.034	124.567	0.363985	3.08788
Session 5	193 nm	WF-98_628,7_20	WF-98_628,7	Waterfound	Eearly hydrothermal muscovites	Altered	321.097	10.6606	8.00981	0.229292	0.798771	1623.1	15.13	5.08954	57.4246	320.384	123.545	0.384761	3.08186
Session 5	193 nm	WF-98_628,7_21	WF-98_628,7	Waterfound	Eearly hydrothermal muscovites	Altered	289.043	10.6927	7.28618	0.202902	0.83453	1625.65	14.93	5.38641	55.2836	305.223	117.699	0.407204	2.96696
Session 5	193 nm	WF-98_628,7_22	WF-98_628,7	Waterfound	Eearly hydrothermal muscovites	Altered	278.74	9.96844	7.10491	0.187499	0.803641	1638.29	15.66	5.47566	54.8015	299.221	115.385	0.413951	2.94109
Session 5	193 nm	WF-98_628,7_23	WF-98_628,7	Waterfound	Eearly hydrothermal muscovites	Altered	323.62	13.8945	7.94868	0.193121	0.650458	1599.42	23.75	4.69962	52.6205	298.163	114.977	0.355284	2.82404
Session 5	193 nm	WF-98_628,7_24	WF-98_628,7	Waterfound	Eearly hydrothermal muscovites	Altered	307.36	21.2523	7.70181	0.370577	0.92866	1624.57	20.74	4.92326	53.4125	296.658	114.397	0.372191	2.86654
Session 5	193 nm	WF-98_628,7_25	WF-98_628,7	Waterfound	Eearly hydrothermal muscovites	Altered	304.607	10.8445	7.72924	0.187024	0.821318	1643.63	15.25	4.23004	46.0551	252.604	97.4084	0.319784	2.47169
Session 5	193 nm	WF-98_628,7_26	WF-98_628,7	Waterfound	Eearly hydrothermal muscovites	Altered	178.289	6.23191	4.87429	0.122348	0.805537	1670.56	14.78	7.50492	51.5293	262.317	101.154	0.56736	2.76548
Session 5	193 nm	WF-98_628,7_27	WF-98_628,7	Waterfound	Eearly hydrothermal muscovites	Altered	298.441	9.87895	7.68247	0.172417	0.739627	1664.29	16.75	4.37571	47.3528	256.014	98.7232	0.330796	2.54133
Session 5	193 nm	WF-98_628,7_28	WF-98_628,7	Waterfound	Eearly hydrothermal muscovites	Altered	192.036	10.2083	5.18413	0.186704	0.907338	1665.86	16.81	6.25934	45.709	235.65	90.8708	0.473196	2.45311
Session 5	193 nm	WF-98_628,7_29	WF-98_628,7	Waterfound	Eearly hydrothermal muscovites	Altered	190.231	7.84178	5.09814	0.153154	0.75196	1651.93	19.49	6.29227	45.1873	234.663	90.4903	0.475686	2.42511
Session 5	193 nm	WF-98_628,7_30	WF-98_628,7	Waterfound	Eearly hydrothermal muscovites	Altered	308.602	12.5279	7.64316	0.25388	0.722352	1606.46	21.05	4.47101	48.1366	270.495	104.308	0.338001	2.5834
Session 5	193 nm	WF-98_628,7_31	WF-98_628,7	Waterfound	Eearly hydrothermal muscovites	Altered	372.57	18.5912	9.08601	0.326949	0.915885	1604.86	15.66	4.1381	52.9628	302.249	116.552	0.312834	2.84241
Session 5	193 nm	WF-98_628,7_32	WF-98_628,7	Waterfound	Eearly hydrothermal muscovites	Altered	429.506	20.9894	10.6389	0.368726	0.901555	1644.89	17.03	3.53907	53.0376	297.998	114.913	0.267548	2.84642
Session 5	193 nm	WF-98_628,7_33	WF-98_628,7	Waterfound	Eearly hydrothermal muscovites	Altered	403.017	17.5399	9.83791	0.337608	0.851912	1614.84	17.01	4.39382	60.8894	347.153	133.868	0.332165	3.26781
Session 5	193 nm	WF-98_628,7_34	WF-98_628,7	Waterfound	Eearly hydrothermal muscovites	Altered	294.2	11.2009	7.50059	0.186696	0.759552	1646.48	18.44	5.20962	55.0426	300.473	115.868	0.393839	2.95403
Session 5	193 nm	WF-98_628,7_35	WF-98_628,7	Waterfound	Eearly hydrothermal muscovites	Altered	290.385	8.19356	7.44443	0.205187	0.784766	1653.64	14.36	5.4236	56.8743	308.757	119.062	0.410015	3.05233
Session 5	193 nm	WF-98_628,7_36	WF-98_628,7	Waterfound	Eearly hydrothermal muscovites	Altered	261.712	8.84097	6.75444	0.169999	0.744188	1648.86	16.73	5.92772	56.3994	304.136	117.28	0.448126	3.02684
Session 5	193 nm	WF-98_628,7_37	WF-98_628,7	Waterfound	Eearly hydrothermal muscovites	Altered	258.436	12.0998	6.76378	0.213534	0.880726	1669.77	17.14	5.81922	55.4436	294.832	113.692	0.439924	2.97555
Session 5	193 nm	WF-98_628,7_38	WF-98_628,7	Waterfound	Eearly hydrothermal muscovites	Altered	146.759	7.25907	4.14406	0.126602	0.89855	1676.31	16.09	9.98296	58.275	287.223	110.758	0.754696	3.1275
Session 5	193 nm	WF-98_628,7_39	WF-98_628,7	Waterfound	Eearly hydrothermal muscovites	Altered	410.605	14.9531	10.0116	0.339263	0.772712	1614.92	18.3	3.96948	55.98	319.532	123.217	0.300086	3.00434
Session 5	193 nm	WF-98_628,7_40	WF-98_628,7	Waterfound	Eearly hydrothermal muscovites	Altered	369.74	14.9116	9.1124	0.303066	0.837774	1620.79	16.47	4.33974	55.7048	314.569	121.303	0.328077	2.98957
Session 5	193 nm	WF-93_581_1	WF-93_581	Waterfound	Eearly hydrothermal muscovites	Altered	240.55	11.6369	6.19175	0.280602	0.923211	1680.7	14.7	8.28232	72.246	384.19	148.15	0.615882	3.81338
Session 5	193 nm	WF-93_581_2	WF-93_581	Waterfound	Eearly hydrothermal muscovites	Altered	290.871	10.3881	7.57754	0.194464	0.838333	1723.4	15.6	7.2924	77.848	409.035	157.731	0.54227	4.10907
Session 5	193 nm	WF-93_581_3	WF-93_581	Waterfound	Eearly hydrothermal muscovites	Altered	226.237	4.72634	5.88886	0.164743	0.743157	1691.2	15.7	8.42025	69.8562	367.347	141.655	0.626139	3.68724
Session 5	193 nm	WF-93_581_4	WF-93_581	Waterfound	Eearly hydrothermal muscovites	Altered	201.499	10.6517	5.31182	0.292148	0.963566	1695.8	13	8.72844	65.3174	339.155	130.784	0.649056	3.44767
Session 5	193 nm	WF-93_581_5	WF-93_581	Waterfound	Eearly hydrothermal muscovites	Altered	255.96	7.99416	6.65993	0.155827	0.795423	1706.5	14.8	7.62786	70.991	376.499	145.184	0.567215	3.77761
Session 5	193 nm	WF-93_581_6	WF-93_581	Waterfound	Eearly hydrothermal muscovites	Altered	285.217	8.42117	7.33937	0.19244	0.683281	1700.4	18	7.02376	72.6234	386.308	148.967	0.522294	3.8333
Session 5	193 nm	WF-93_581_7	WF-93_581	Waterfound	Eearly hydrothermal muscovites	Altered	252.691	8.92845	6.61316	0.192457	0.798187	1714.8	16.9	7.7515	72.2177	377.715	145.653	0.57641	3.81189
Session 5	193 nm	WF-93_581_8	WF-93_581	Waterfound	Eearly hydrothermal muscovites	Altered	242.476	9.06517	6.40945	0.238387	0.883482	1726.5	14.9	7.92095	71.5231	370.369	142.821	0.589009	3.77523
Session 5	193 nm	WF-93_581_9	WF-93_581	Waterfound	Eearly hydrothermal muscovites	Altered	243.074	10.1558	6.15205	0.258089	0.913435	1654.2	14	7.86619	68.1762	368.715	142.183	0.584938	3.59857
Session 5	193 nm	WF-93_581_10	WF-93_581	Waterfound	Eearly hydrothermal muscovites	Altered	282.71	8.01144	7.27804	0.154018	0.717411	1700.2	15.6	6.57016	67.3657	358.184	138.122	0.488564	3.55579
Session 5	193 nm	WF-93_581_11	WF-93_581	Waterfound	Eearly hydrothermal muscovites	Altered	344.094	12.7939	8.81526	0.263561	0.868354	1712	14.7	5.45052	67.6895	361.663	139.463	0.405306	3.57288
Session 5	193 nm	WF-93_581_12	WF-93_581	Waterfound	Eearly hydrothermal muscovites	Altered	239.65	7.74518	6.1702	0.217377	0.831363	1680.6	16.3	7.27458	63.2347	336.182	129.637	0.540945	3.33774
Session 5	193 nm	WF-93_581_13	WF-93_581	Waterfound	Eearly hydrothermal muscovites	Altered	300.747	9.11091	7.70131	0.216736	0.721539	1698	17.7	6.001	65.1083	348.028	134.206	0.44624	3.43663
Session 5	193 nm	WF-93_581_14	WF-93_581	Waterfound	Eearly hydrothermal muscovites	Altered	261.29	10.8953	6.87078	0.200722	0.87904	1726.9	16.3	6.63739	64.2469	334.434	128.963	0.493563	3.39116
Session 5	193 nm	WF-93_581_15	WF-93_581	Waterfound	Eearly hydrothermal muscovites	Altered	268.879	7.42471	6.95065	0.161575	0.727372	1701.4	15.3	5.90021	57.7752	305.923	117.969	0.438745	3.04957
Session 5	193 nm	WF-93_581_16	WF-93_581	Waterfound	Eearly hydrothermal muscovites	Altered	256.786	7.61215	6.59255	0.173783	0.797374	1684.5	14.3	6.81574	63.3016	337.5	130.146	0.506825	3.34127
Session 5	193 nm	WF-93_581_17	WF-93_581	Waterfound	Eearly hydrothermal muscovites	Altered	266.774	8.15028	6.7888	0.185546	0.73571	1674.3	16.8	6.71557	63.7028	345.474	133.221	0.499377	3.39017
Session 5	193 nm	WF-93_581_18	WF-93_581	Waterfound	Eearly hydrothermal muscovites	Altered	267.331	9.40288	6.64011	0.229909	0.794678	1634.9	17.5	6.45677	60.4003	332.853	128.354	0.480132	3.18813
Session 5	193 nm	WF-93_581_19	WF-93_581	Waterfound	Eearly hydrothermal muscovites	Altered	320.421	11.5001	7.88562	0.228645	0.725009	1638.8	19.2	5.25588	58.5872	328.543	126.692	0.395392	3.11791
Session 5	193 nm	WF-93_581_20	WF-93_581	Waterfound	Eearly hydrothermal muscovites	Altered	274.341	10.1836	6.88515	0.179619	0.731143	1654.7	19.3	6.41507	62.2249	339.377	130.869	0.477031	3.28443
Session 5	193 nm	WF-93_581_21	WF-93_581	Waterfound	Eearly hydrothermal muscovites	Altered	277.421	10.1902	6.86937	0.189576	0.849487	1634	14.7	5.98015	57.8732	319.919	123.366	0.44469	3.05474
Session 5	193 nm	WF-93_581_22	WF-93_581	Waterfound	Eearly hydrothermal muscovites	Altered	285.47	8.54067	7.09826	0.176313	0.634279	1643.9	18.5	6.09529	60.953	335.539	129.39	0.453252	3.2173
Session 5	193 nm	WF-93_581_23	WF-93_581	Waterfound	Eearly hydrothermal muscovites	Altered	308.357	9.87139	7.77311	0.204825	0.737065	1674.3	17.2	5.68757	62.2831	338.197	130.415	0.422933	3.28751
Session 5	193 nm	WF-93_581_24	WF-93_581	Waterfound	Eearly hydrothermal muscovites	Altered	268.504	9.76566	6.89081	0.185114	0.660498	1689.1	21.5	6.3961	62.0918	331.172	127.706	0.47562	3.27741
Session 5	193 nm	WF-93_581_25	WF-93_581	Waterfound	Eearly hydrothermal muscovites	Altered	355.537	14.815	9.03941	0.27658	0.698479	1702.2	23.9	4.59082	58.4627	314.748	121.372	0.341378	3.08586
Session 5	193 nm	WF-93_581_26	WF-93_581	Waterfound	Eearly hydrothermal muscovites	Altered	343.403	10.0425	8.75955	0.224516	0.52848	1704.5	21.8	4.76619	58.8169	315.619	121.708	0.354419	3.10455
Session 5	193 nm	WF-93_581_27	WF-93_581	Waterfound	Eearly hydrothermal muscovites	Altered	276.215	8.7243	6.9538	0.160789	0.74683	1660.5	16.1	6.42868	63.4198	342.419	132.043	0.478043	3.32421
Session 5	193 nm	WF-93_581_28	WF-93_581	Waterfound	Eearly hydrothermal muscovites	Altered	263.688	8.69127	6.87689	0.158174	0.661213	1714	19.6	5.85607	56.7344	297.773	114.826	0.435463	2.99463
Session 5	193 nm	WF-93_581_29	WF-93_581	Waterfound	Eearly hydrothermal muscovites	Altered	249.336	6.43513	6.63732	0.163881	0.59132	1742.1	18.9	6.2917	58.8315	302.511	116.654	0.467857	3.10532
Session 5	193 nm	WF-93_581_30	WF-93_581	Waterfound	Eearly hydrothermal muscovites	Altered	261.659	8.6586	6.66009	0.160052	0.813598	1672.4	14.8	6.39485	60.4687	322.667	124.426	0.475527	3.16706
Session 5	193 nm	WF-93_581_31	WF-93_581	Waterfound	Eearly hydrothermal muscovites	Altered	269.177	7.78485	6.7469	0.154521	0.557611	1650.5	19.3	6.79602	64.5963	352.761	136.031	0.505359	3.4096
Session 5	193 nm	WF-93_581_32	WF-93_581	Waterfound	Eearly hydrothermal muscovites	Altered	277.236	8.46174	7.13903	0.187068	0.634901	1698.5	19.7	6.55603	65.9369	350.493	135.156	0.487513	3.48037
Session 5	193 nm	WF-93_581_33	WF-93_581	Waterfound	Eearly hydrothermal muscovites	Altered	279.716	10.7058	7.18226	0.214449	0.723763	1694.7	20.9	6.37199	64.4741	343.701	132.537	0.473828	3.40315
Session 5	193 nm	WF-93_581_34	WF-93_581	Waterfound	Eearly hydrothermal muscovites	Altered	276.152	10.1592	7.04182	0.184204	0.790792	1681.7	17.5	6.55444	65.0233	349.037	134.595	0.487395	3.43215
Session 5	193 nm	WF-93_581_35	WF-93_581	Waterfound	Eearly hydrothermal muscovites	Altered	245.211	7.27898	6.27624	0.149833	0.544817	1673.8	20.4	7.00775	61.9622	331.366	127.78	0.521104	3.27057
Session 5	193 nm	WF-93_581_36	WF-93_581	Waterfound	Eearly hydrothermal muscovites	Altered	246.117	7.92205	6.30424	0.163818	0.662656	1675.5	19.2	7.32761	65.0794	347.77	134.106	0.544888	3.43511
Session 5	193 nm	WF-93_581_37	WF-93_581	Waterfound	Eearly hydrothermal muscovites	Altered	319.918	11.6978	7.69989	0.221848	0.778863	1603	17.2	5.32962	57.8135	328.793	126.788	0.396316	3.05159
Session 5	193 nm	WF-93_581_38	WF-93_581	Waterfound	Eearly hydrothermal muscovites	Altered	259.268	8.14478	6.3453	0.170501	0.64957	1607.8	18.7	6.452	57.676	322.576	124.391	0.479777	3.04433
Session 5	193 nm	WF-93_581_39	WF-93_581	Waterfound	Eearly hydrothermal muscovites	Altered	282.59	8.55589	7.02224	0.153723	0.58748	1641.8	19.1	6.01842	59.5397	327.965	126.469	0.447535	3.1427
Session 5	193 nm	WF-93_581_40	WF-93_581	Waterfound	Eearly hydrothermal muscovites	Altered	267.788	8.64814	6.79274	0.198483	0.740688	1669.5	17.6	6.44554	61.6812	332.843	128.35	0.479297	3.25574
Session 5	193 nm	WF-93_581_41	WF-93_581	Waterfound	Eearly hydrothermal muscovites	Altered	341.098	14.6599	8.62948	0.287787	0.521035	1690.1	30.7	5.61412	68.252	369.275	142.399	0.417472	3.60256
Session 5	193 nm	WF-93_581_42	WF-93_581	Waterfound	Eearly hydrothermal muscovites	Altered	318.657	13.0475	7.93784	0.266587	0.711807	1658	22.7	5.79971	64.857	356.384	137.428	0.431272	3.42337
Session 5	193 nm	WF-93_581_43	WF-93_581	Waterfound	Eearly hydrothermal muscovites	Altered	289.922	15.6845	7.69744	0.245195	0.595129	1755.7	35.3	5.64749	61.2422	315.737	121.754	0.419953	3.23256
Session 5	193 nm	WF-93_581_44	WF-93_581	Waterfound	Eearly hydrothermal muscovites	Altered	267.085	12.5759	6.99241	0.190828	0.658013	1722.1	28.1	6.85004	67.479	352.803	136.047	0.509376	3.56177
Session 5	193 nm	WF-93_581_45	WF-93_581	Waterfound	Eearly hydrothermal muscovites	Altered	258.74	12.7095	6.59137	0.159295	0.337699	1672.5	36.2	6.3703	59.154	317.842	122.565	0.473702	3.12235
Session 5	193 nm	WF-93_581_46	WF-93_581	Waterfound	Eearly hydrothermal muscovites	Altered	231.709	10.8563	5.83008	0.226723	0.582475	1638.6	30.5	7.53213	61.8645	336.549	129.779	0.560097	3.26541
Session 5	193 nm	WF-93_581_47	WF-93_581	Waterfound	Eearly hydrothermal muscovites	Altered	312.293	13.0303	7.86627	0.184874	0.485045	1674.3	28.6	5.68642	63.0167	342.444	132.052	0.422848	3.32623
Session 5	193 nm	WF-93_581_48	WF-93_581	Waterfound	Eearly hydrothermal muscovites	Altered	262.709	10.2396	6.79105	0.160423	0.519336	1698.7	26.3	6.60605	63.2014	334.661	129.051	0.491232	3.33598
Session 5	193 nm	WF-93_581_49	WF-93_581	Waterfound	Eearly hydrothermal muscovites	Altered	256.679	15.7863	6.21845	0.366941	0.970128	1590.5	11.3	6.73363	58.9902	333.295	128.524	0.500719	3.1137
Session 5	193 nm	WF-93_581_50	WF-93_581	Waterfound	Eearly hydrothermal muscovites	Altered	311.595	12.6811	7.57095	0.343807	0.899737	1615.5	16	5.54509	59.1436	333.187	128.483	0.412339	3.12179
Session 6	193 nm	MC-410-01_677,9_1	MC-410-01_677,9	McArthur River	Metamorphic muscovites	Altered	32.3199	1.92557	1.44443	0.0359761	0.619491	1756.2	22.9	19.8198	40.3408	128.241	49.4518	1.53007	2.21008
Session 6	193 nm	MC-410-01_677,9_2	MC-410-01_677,9	McArthur River	Metamorphic muscovites	Altered	25.8707	1.51317	1.22567	0.0343597	0.496073	1677	23.9	15.909	26.9387	82.3963	31.7734	1.22816	1.50532
Session 6	193 nm	MC-410-01_677,9_3	MC-410-01_677,9	McArthur River	Metamorphic muscovites	Preserved	28.4967	1.57203	1.3877	0.0310205	0.251133	1805.3	28.4	24.1132	46.6393	137.565	53.0473	1.86152	2.58323
Session 6	193 nm	MC-410-01_677,9_4	MC-410-01_677,9	McArthur River	Metamorphic muscovites	Preserved	27.3676	1.59524	1.3812	0.0331727	0.681567	1834.6	20.1	23.9611	46.6348	131.28	50.6239	1.84978	2.5549
Session 6	193 nm	MC-410-01_677,9_6	MC-410-01_677,9	McArthur River	Metamorphic muscovites	Preserved	68.4729	3.96652	2.40182	0.0622663	0.787161	1800.1	23.9	13.7356	46.4874	188.287	72.6069	1.06037	2.54683
Session 6	193 nm	MC-410-01_677,9_7	MC-410-01_677,9	McArthur River	Metamorphic muscovites	Preserved	50.2648	2.59428	1.94052	0.0579046	0.51916	1802.4	28.1	13.7553	37.6127	138.417	53.3759	1.06189	2.06063
Session 6	193 nm	MC-410-01_677,9_8	MC-410-01_677,9	McArthur River	Metamorphic muscovites	Preserved	59.2686	3.0456	2.17534	0.0612466	0.723456	1806.6	22.1	13.6435	41.8217	161.885	62.4257	1.05327	2.29121
Session 6	193 nm	MC-410-01_677,9_9	MC-410-01_677,9	McArthur River	Metamorphic muscovites	Preserved	35.1165	2.03729	1.56695	0.0579829	0.71438	1817	24.1	26.3052	58.0823	184.93	71.3123	2.03074	3.18206
Session 6	193 nm	MC-410-01_677,9_10	MC-410-01_677,9	McArthur River	Metamorphic muscovites	Preserved	30.9836	1.83007	1.43894	0.030922	0.691466	1790.2	20.6	27.7034	56.1726	171.839	66.2639	2.13868	3.07743
Session 6	193 nm	MC-410-01_677,9_11	MC-410-01_677,9	McArthur River	Metamorphic muscovites	Preserved	38.8706	2.49906	1.63976	0.04463	0.386832	1791.4	33.3	22.714	52.4834	176.754	68.1596	1.7535	2.87532
Session 6	193 nm	MC-410-01_677,9_12	MC-410-01_677,9	McArthur River	Metamorphic muscovites	Preserved	44.7128	2.59492	1.7797	0.0636448	0.819413	1783.3	19.2	21.4134	53.7008	191.678	73.9144	1.65309	2.94201
Session 6	193 nm	MC-410-01_677,9_13	MC-410-01_677,9	McArthur River	Metamorphic muscovites	Preserved	37.0321	2.80593	1.60698	0.0403203	0.564118	1806.7	32.9	23.3873	52.9589	173.386	66.8607	1.80548	2.90137
Session 6	193 nm	MC-410-01_677,9_14	MC-410-01_677,9	McArthur River	Metamorphic muscovites	Preserved	49.5752	3.20587	1.89732	0.0530919	0.543547	1778.7	31.6	17.0003	45.4513	168.724	65.0629	1.31241	2.49006
Session 6	193 nm	MC-410-01_677,9_15	MC-410-01_677,9	McArthur River	Metamorphic muscovites	Preserved	19.6284	1.34187	1.1575	0.0246939	0.229442	1799.7	28.6	31.8495	51.9484	125.154	48.2614	2.45875	2.84601
Session 6	193 nm	MC-410-01_677,9_16	MC-410-01_677,9	McArthur River	Metamorphic muscovites	Preserved	25.5612	1.72987	1.34394	0.0284983	0.480723	1847.7	27.3	29.6832	56.2134	151.897	58.5741	2.29152	3.07967
Session 6	193 nm	MC-410-01_677,9_18	MC-410-01_677,9	McArthur River	Metamorphic muscovites	Preserved	51.1561	3.68504	1.98813	0.0575496	0.481746	1824.9	38.2	11.215	31.419	114.856	44.2905	0.86579	1.7213
Session 6	193 nm	MC-410-01_677,9_19	MC-410-01_677,9	McArthur River	Metamorphic muscovites	Preserved	109.837	8.71818	3.38765	0.110445	0.697741	1765.3	41.5	7.41654	35.4036	163.081	62.8869	0.57255	1.9396
Session 6	193 nm	MC-410-01_677,9_20	MC-410-01_677,9	McArthur River	Metamorphic muscovites	Altered	124.773	9.9767	3.6737	0.189537	0.712868	1724.9	39.8	5.25688	27.2132	131.312	50.6363	0.405827	1.49088
Session 6	193 nm	MC-410-01_677,9_22	MC-410-01_677,9	McArthur River	Metamorphic muscovites	Preserved	670.441	75.6668	17.6912	1.57844	0.973031	1795.8	26.6	2.44749	61.0135	328.502	126.676	0.188944	3.34265
Session 6	193 nm	MC-410-01_677,9_23	MC-410-01_677,9	McArthur River	Metamorphic muscovites	Preserved	360.3	55.3308	9.8497	1.09889	0.956869	1802.8	43.5	4.58873	63.6888	330.988	127.635	0.354246	3.48921
Session 6	193 nm	MC-410-01_677,9_27	MC-410-01_677,9	McArthur River	Metamorphic muscovites	Preserved	70.6845	5.43066	2.46314	0.129706	0.778258	1803.7	32.4	6.94402	24.1017	98.2631	37.892	0.536072	1.32042
Session 6	193 nm	MC-410-01_677,9_28	MC-410-01_677,9	McArthur River	Metamorphic muscovites	Preserved	42.5063	5.56523	1.72509	0.152003	0.89024	1784.4	35.5	15.0772	36.6504	128.301	49.475	1.16395	2.00791
Session 6	193 nm	MC-410-01_677,9_29	MC-410-01_677,9	McArthur River	Metamorphic muscovites	Preserved	92.3454	7.35996	3.05474	0.273139	0.88383	1826.6	40.6	9.16235	39.4393	169.386	65.3182	0.707325	2.16069
Session 6	193 nm	MC-410-01_677,9_30	MC-410-01_677,9	McArthur River	Metamorphic muscovites	Preserved	54.6058	3.27681	2.04009	0.0873315	0.581667	1792.7	33.9	11.0587	31.7907	120.892	46.618	0.853718	1.74166
Session 6	193 nm	MC-410-01_677,9_31	MC-410-01_677,9	McArthur River	Metamorphic muscovites	Preserved	37.6993	7.34297	1.6391	0.154082	0.978447	1823.3	27.5	23.2071	53.6011	175.15	67.5408	1.79157	2.93655
Session 6	193 nm	MC-410-01_677,9_32	MC-410-01_677,9	McArthur River	Metamorphic muscovites	Altered	33.0428	4.13547	1.39317	0.0994018	0.944708	1674	19.5	8.49053	16.6681	56.1652	21.6583	0.655461	0.913169
Session 6	193 nm	MC-410-01_677,9_33	MC-410-01_677,9	McArthur River	Metamorphic muscovites	Preserved	58.078	7.1245	2.21477	0.190488	0.788031	1864.7	51.2	11.8811	37.0794	138.141	53.2696	0.917209	2.03141
Session 6	193 nm	MC-410-01_677,9_34	MC-410-01_677,9	McArthur River	Metamorphic muscovites	Altered	66.2297	4.32178	2.14023	0.0707008	0.579588	1644.9	31.5	6.8477	20.6515	90.7931	35.0114	0.528636	1.1314
Session 6	193 nm	MC-410-01_677,9_35	MC-410-01_677,9	McArthur River	Metamorphic muscovites	Altered	49.0587	2.92663	1.70611	0.0582864	0.634343	1612.3	25.2	7.1936	17.2942	70.6509	27.2442	0.555339	0.947469
Session 6	193 nm	MC-410-01_677,9_36	MC-410-01_677,9	McArthur River	Metamorphic muscovites	Altered	69.4832	4.70969	2.11259	0.0823188	0.566674	1569.1	32.7	5.38641	16.0348	74.9264	28.8929	0.415826	0.878469
Session 6	193 nm	MC-410-01_677,9_37	MC-410-01_677,9	McArthur River	Metamorphic muscovites	Altered	110.178	6.98333	3.28052	0.098816	0.692572	1705.9	31.6	6.37466	29.4678	140.608	54.2208	0.492118	1.6144
Session 6	193 nm	MC-410-01_677,9_38	MC-410-01_677,9	McArthur River	Metamorphic muscovites	Altered	38.4973	2.13347	1.59355	0.0447687	0.291771	1751.5	31.7	20.7906	46.6853	160.233	61.7888	1.60502	2.55767
Session 6	193 nm	MC-410-01_677,9_39	MC-410-01_677,9	McArthur River	Metamorphic muscovites	Altered	59.6465	3.38843	2.04813	0.0589827	0.510822	1694.8	29.4	9.82108	28.3442	117.273	45.2227	0.758178	1.55285
Session 6	193 nm	MC-410-01_677,9_40	MC-410-01_677,9	McArthur River	Metamorphic muscovites	Altered	168.84	10.6703	4.58403	0.167173	0.625148	1665.8	35.3	3.7895	24.4781	128.089	49.3935	0.292546	1.34104
Session 6	193 nm	MC-408_592,3_2	MC-408_592,3	McArthur River	Eearly hydrothermal muscovites	Altered	65.8528	8.36452	2.11188	0.172854	0.967597	1517.53	16.09	7.56645	22.5161	97.4693	37.5858	0.570756	1.20537
Session 6	193 nm	MC-408_592,3_3	MC-408_592,3	McArthur River	Eearly hydrothermal muscovites	Altered	36.1669	5.04025	1.49499	0.106135	0.963039	1537.12	15	19.4742	41.0233	137.776	53.1287	1.46899	2.19612
Session 6	193 nm	MC-408_592,3_4	MC-408_592,3	McArthur River	Eearly hydrothermal muscovites	Altered	71.4114	4.85348	2.18432	0.0586521	0.79696	1486.11	22.05	10.0246	30.8544	140.035	54	0.756183	1.65174
Session 6	193 nm	MC-408_592,3_5	MC-408_592,3	McArthur River	Eearly hydrothermal muscovites	Altered	105.417	7.52659	3.00561	0.0946743	0.77387	1540.81	27.53	7.95471	33.6891	164.036	63.255	0.600043	1.8035
Session 6	193 nm	MC-408_592,3_6	MC-408_592,3	McArthur River	Eearly hydrothermal muscovites	Altered	182.678	13.5386	4.45295	0.180969	0.84292	1464.67	26.1	5.3052	33.2875	189.578	73.1047	0.400184	1.782
Session 6	193 nm	MC-408_592,3_10	MC-408_592,3	McArthur River	Eearly hydrothermal muscovites	Altered	79.7253	5.36232	2.4083	0.0733385	0.788028	1517	22.68	9.62572	32.6645	150.117	57.8879	0.726091	1.74865
Session 6	193 nm	MC-408_592,3_11	MC-408_592,3	McArthur River	Eearly hydrothermal muscovites	Altered	71.9138	5.65133	2.22325	0.0809678	0.728759	1505.13	27.64	11.3695	35.6173	159.939	61.6752	0.857627	1.90672
Session 6	193 nm	MC-408_592,3_12	MC-408_592,3	McArthur River	Eearly hydrothermal muscovites	Altered	163.662	13.8297	4.22311	0.218924	0.94565	1522.97	20.53	6.06163	36.0706	194.061	74.8332	0.457244	1.93099
Session 6	193 nm	MC-408_592,3_13	MC-408_592,3	McArthur River	Eearly hydrothermal muscovites	Altered	182.19	12.3385	4.54093	0.125546	0.779868	1496.66	29.49	6.09467	38.9966	217.208	83.7592	0.459735	2.08762
Session 6	193 nm	MC-408_592,3_14	MC-408_592,3	McArthur River	Eearly hydrothermal muscovites	Altered	90.0169	6.95338	2.63051	0.108324	0.865015	1517.99	22.15	9.50713	35.2388	167.407	64.5552	0.717145	1.88646
Session 6	193 nm	MC-408_592,3_16	MC-408_592,3	McArthur River	Eearly hydrothermal muscovites	Altered	36.8241	3.64385	1.50827	0.0712187	0.958663	1536.13	11.56	20.5296	43.6306	147.882	57.0257	1.5486	2.3357
Session 6	193 nm	MC-408_592,3_18	MC-408_592,3	McArthur River	Eearly hydrothermal muscovites	Altered	67.8487	5.61916	2.14203	0.0775299	0.856382	1508.73	23.23	14.2557	43.0273	189.204	72.9604	1.07534	2.30341
Session 6	193 nm	MC-408_592,3_19	MC-408_592,3	McArthur River	Eearly hydrothermal muscovites	Altered	71.7971	5.20294	2.21497	0.070043	0.755361	1501.24	24.64	11.0389	34.453	155.037	59.7849	0.832692	1.84439
Session 6	193 nm	MC-408_592,3_38	MC-408_592,3	McArthur River	Eearly hydrothermal muscovites	Altered	153.168	13.3856	3.80205	0.211233	0.930199	1449.29	20.66	6.61058	36.5242	204.268	78.7693	0.514268	1.95527
Session 6	193 nm	MC-408_592,3_39	MC-408_592,3	McArthur River	Eearly hydrothermal muscovites	Altered	72.5559	5.26307	2.34556	0.0765525	0.695341	1577.44	28.08	8.23679	27.223	116.905	45.0805	0.621321	1.45734
Session 6	193 nm	MC-408_592,3_40	MC-408_592,3	McArthur River	Eearly hydrothermal muscovites	Altered	158.365	11.4484	4.01837	0.175139	0.819769	1489.66	25.62	6.54312	37.0482	202.696	78.163	0.493563	1.98332
Session 6	193 nm	MC-408_700,9_1	MC-408_700,9	McArthur River	Eearly hydrothermal muscovites	Altered	106.386	4.65949	3.10316	0.110576	0.834302	1593.5	15.8	10.3062	45.0594	212.772	82.0486	0.771233	2.39326
Session 6	193 nm	MC-408_700,9_2	MC-408_700,9	McArthur River	Eearly hydrothermal muscovites	Altered	91.3683	3.39659	2.76795	0.0854304	0.47379	1595.1	23.8	12.3273	48.0741	218.572	84.2853	0.922479	2.55338
Session 6	193 nm	MC-408_700,9_3	MC-408_700,9	McArthur River	Eearly hydrothermal muscovites	Altered	112.714	4.63158	3.2895	0.0976903	0.748074	1614.8	17.6	9.31471	43.1702	203.742	78.5665	0.697041	2.29291
Session 6	193 nm	MC-408_700,9_4	MC-408_700,9	McArthur River	Eearly hydrothermal muscovites	Altered	160.634	6.07581	4.40682	0.168498	0.624809	1623.5	24.8	7.26193	45.0881	226.371	87.2926	0.543427	2.39478
Session 6	193 nm	MC-408_700,9_5	MC-408_700,9	McArthur River	Eearly hydrothermal muscovites	Altered	112.533	3.20346	3.34857	0.0729851	0.434535	1645.5	19.1	9.41755	44.4307	205.661	79.3063	0.704737	2.35986
Session 6	193 nm	MC-408_700,9_6	MC-408_700,9	McArthur River	Eearly hydrothermal muscovites	Altered	78.4467	4.82841	2.552	0.136965	0.920426	1643.1	17.6	13.8457	49.7829	210.776	81.279	1.0361	2.64414
Session 6	193 nm	MC-408_700,9_8	MC-408_700,9	McArthur River	Eearly hydrothermal muscovites	Altered	114.793	5.00936	3.32663	0.132744	0.829818	1609.9	17.7	8.74335	40.9795	194.771	75.1072	0.654285	2.17656
Session 6	193 nm	MC-408_700,9_9	MC-408_700,9	McArthur River	Eearly hydrothermal muscovites	Altered	105.709	4.00095	3.24753	0.103802	0.8502	1674.9	14	9.16453	41.9323	187.999	72.4956	0.685803	2.22717
Session 6	193 nm	MC-408_700,9_11	MC-408_700,9	McArthur River	Eearly hydrothermal muscovites	Altered	179.73	8.86568	4.67168	0.198169	0.939717	1566.1	11.4	6.49046	42.7202	226.375	87.2939	0.485696	2.26902
Session 6	193 nm	MC-408_700,9_12	MC-408_700,9	McArthur River	Eearly hydrothermal muscovites	Altered	107.966	3.96969	3.17321	0.0848784	0.8073	1610.8	13.7	10.3925	46.4625	217.74	83.9644	0.777694	2.46778
Session 6	193 nm	MC-408_700,9_13	MC-408_700,9	McArthur River	Eearly hydrothermal muscovites	Altered	195.823	8.57527	5.13105	0.206874	0.799255	1597.9	19.6	6.03781	43.6486	229.443	88.4773	0.451823	2.31833
Session 6	193 nm	MC-408_700,9_14	MC-408_700,9	McArthur River	Eearly hydrothermal muscovites	Altered	196.443	7.30758	5.17272	0.162906	0.779609	1606.4	16.8	6.10112	44.4645	232.583	89.6882	0.456561	2.36166
Session 6	193 nm	MC-408_700,9_15	MC-408_700,9	McArthur River	Eearly hydrothermal muscovites	Altered	165.537	8.24592	4.53789	0.206242	0.900047	1630.1	16	6.91097	44.1853	222.007	85.6097	0.517164	2.34683
Session 6	193 nm	MC-408_700,9_16	MC-408_700,9	McArthur River	Eearly hydrothermal muscovites	Altered	186.592	7.81378	4.72048	0.172903	0.832787	1533	15.9	5.56756	37.0285	201.6	77.7405	0.416633	1.96671
Session 6	193 nm	MC-408_700,9_20	MC-408_700,9	McArthur River	Eearly hydrothermal muscovites	Altered	58.0078	2.67972	2.02748	0.0844621	0.74246	1604.1	22.1	11.1693	31.9058	125.732	48.4845	0.835827	1.69463
Session 6	193 nm	MC-408_700,9_21	MC-408_700,9	McArthur River	Eearly hydrothermal muscovites	Altered	123.971	7.81801	3.37718	0.189739	0.851874	1538.6	22.5	8.91063	42.3983	214.369	82.6644	0.666803	2.25192
Session 6	193 nm	MC-408_700,9_22	MC-408_700,9	McArthur River	Eearly hydrothermal muscovites	Altered	104.334	6.39995	2.88093	0.148686	0.922772	1502.7	14.8	9.85334	39.9946	199.5	76.9307	0.737348	2.12425
Session 6	193 nm	MC-408_700,9_23	MC-408_700,9	McArthur River	Eearly hydrothermal muscovites	Altered	26.4744	1.44955	1.29961	0.054706	0.377841	1588.2	31.4	27.5576	50.4592	141.579	54.5955	2.0622	2.68006
Session 6	193 nm	MC-408_700,9_24	MC-408_700,9	McArthur River	Eearly hydrothermal muscovites	Altered	23.5985	0.793218	1.2316	0.0355545	0.55392	1583.7	18.9	35.2108	61.0982	161.247	62.1798	2.6349	3.24514
Session 6	193 nm	MC-408_700,9_25	MC-408_700,9	McArthur River	Eearly hydrothermal muscovites	Altered	143.722	8.99994	4.00655	0.193974	0.728858	1618.6	29.5	7.89374	44.5593	220.16	84.8976	0.590706	2.3667
Session 6	193 nm	MC-408_700,9_26	MC-408_700,9	McArthur River	Eearly hydrothermal muscovites	Altered	139.661	9.04713	3.87825	0.242305	0.910164	1604.1	20.8	7.37039	40.2727	199.755	77.0291	0.551543	2.13902
Session 6	193 nm	MC-408_700,9_27	MC-408_700,9	McArthur River	Eearly hydrothermal muscovites	Altered	97.7555	8.49239	2.83208	0.1628	0.918735	1551.9	20	11.8962	47.4676	225.674	87.0236	0.890217	2.52117
Session 6	193 nm	MC-408_700,9_29	MC-408_700,9	McArthur River	Eearly hydrothermal muscovites	Altered	112.233	5.48222	3.22537	0.131543	0.836124	1588.9	17.9	9.2504	42.0363	201.472	77.6911	0.692228	2.23269
Session 6	193 nm	MC-408_700,9_38	MC-408_700,9	McArthur River	Eearly hydrothermal muscovites	Altered	82.7384	5.14255	2.58279	0.129909	0.857173	1600.9	20.6	6.86192	24.9701	110.176	42.4856	0.513493	1.32625
Session 6	193 nm	MC-408_700,9_39	MC-408_700,9	McArthur River	Eearly hydrothermal muscovites	Altered	111.874	4.42536	3.30176	0.110458	0.604467	1630.1	23.1	8.31382	38.675	180.494	69.6014	0.622142	2.05416
Session 6	193 nm	MC-408_700,9_40	MC-408_700,9	McArthur River	Eearly hydrothermal muscovites	Altered	91.4969	5.33623	2.72837	0.164951	0.908569	1571	21.6	6.62162	25.4538	117.572	45.3377	0.495511	1.35194
Session 6	193 nm	MC-410-02_655_1	MC-410-02_655	McArthur River	Metamorphic muscovites	Altered	85.9432	6.29736	2.7212	0.183604	0.933434	1658.4	21.1	11.0313	42.29	187.827	72.4292	0.842756	2.29331
Session 6	193 nm	MC-410-02_655_2	MC-410-02_655	McArthur River	Metamorphic muscovites	Altered	54.9915	1.90624	2.07585	0.0345081	0.59793	1724.3	15.5	15.9164	46.5472	173.404	66.8678	1.21597	2.52417
Session 6	193 nm	MC-410-02_655_3	MC-410-02_655	McArthur River	Metamorphic muscovites	Altered	55.2532	2.68451	1.98694	0.0955053	0.852911	1646.2	21.9	15.2831	42.7808	167.298	64.513	1.16759	2.31992
Session 6	193 nm	MC-410-02_655_4	MC-410-02_655	McArthur River	Metamorphic muscovites	Altered	55.2651	2.23985	2.00234	0.087407	0.769552	1658.6	23.6	15.2555	42.1852	167.031	64.4102	1.16548	2.33368
Session 6	193 nm	MC-410-02_655_5	MC-410-02_655	McArthur River	Metamorphic muscovites	Altered	59.5955	2.23443	2.03787	0.0460309	0.793021	1607.2	12.3	14.3358	41.1575	169.26	65.2696	1.09521	2.23189
Session 6	193 nm	MC-410-02_655_6	MC-410-02_655	McArthur River	Metamorphic muscovites	Altered	79.7367	2.83036	2.57668	0.0605791	0.544762	1659	19.3	11.7279	42.573	185.268	71.4424	0.89598	2.30865
Session 6	193 nm	MC-410-02_655_7	MC-410-02_655	McArthur River	Metamorphic muscovites	Altered	63.2067	2.21449	2.09882	0.0598116	0.727582	1591.4	15.6	13.9833	41.3465	175.103	67.5227	1.06828	2.24214
Session 6	193 nm	MC-410-02_655_8	MC-410-02_655	McArthur River	Metamorphic muscovites	Altered	55.6113	1.23302	1.98065	0.0611285	0.557707	1634.3	20.8	15.1695	42.9671	169.652	65.4208	1.17639	2.33002
Session 6	193 nm	MC-410-02_655_9	MC-410-02_655	McArthur River	Metamorphic muscovites	Altered	75.2303	2.26198	2.42113	0.0863791	0.841873	1625.9	16.9	12.132	41.3811	180.819	69.727	0.926847	2.24402
Session 6	193 nm	MC-410-02_655_10	MC-410-02_655	McArthur River	Metamorphic muscovites	Altered	78.3069	2.72833	2.54033	0.0764957	0.371977	1657.2	25.6	12.8032	45.8205	198.627	76.5939	0.978124	2.48476
Session 6	193 nm	MC-410-02_655_11	MC-410-02_655	McArthur River	Metamorphic muscovites	Altered	48.3967	1.68773	1.80081	0.0618031	0.740946	1622.6	18.8	18.2853	46.3898	175.322	67.6073	1.39694	2.51563
Session 6	193 nm	MC-410-02_655_12	MC-410-02_655	McArthur River	Metamorphic muscovites	Altered	67.2465	3.19028	2.29852	0.0796013	0.876637	1669.6	13.9	12.7073	41.1486	169.295	65.2829	0.9708	2.23141
Session 6	193 nm	MC-410-02_655_13	MC-410-02_655	McArthur River	Metamorphic muscovites	Altered	225.155	15.9391	5.91685	0.361441	0.925849	1639.8	19.3	4.79881	40.0015	214.061	82.5455	0.366615	2.16921
Session 6	193 nm	MC-410-02_655_14	MC-410-02_655	McArthur River	Metamorphic muscovites	Altered	84.2173	3.93968	2.60798	0.101731	0.875501	1613.9	15	9.28156	33.8219	154.861	59.7171	0.709084	1.84927
Session 6	193 nm	MC-410-02_655_15	MC-410-02_655	McArthur River	Metamorphic muscovites	Altered	129.129	5.09103	3.72355	0.107878	0.756	1654	17.6	7.34238	38.5165	187.836	72.4329	0.560937	2.08868
Session 6	193 nm	MC-410-02_655_16	MC-410-02_655	McArthur River	Metamorphic muscovites	Altered	88.9295	2.13605	2.77673	0.0813837	0.488909	1649.9	21.1	9.14868	35.7886	161.185	62.1557	0.698932	1.94075
Session 6	193 nm	MC-410-02_655_17	MC-410-02_655	McArthur River	Metamorphic muscovites	Altered	404.261	16.5555	9.68373	0.272036	0.665177	1578	22.3	3.96572	56.0194	324.6	125.171	0.30963	2.99837
Session 6	193 nm	MC-410-02_655_18	MC-410-02_655	McArthur River	Metamorphic muscovites	Altered	74.3874	4.22453	2.44775	0.0773938	0.743849	1656.7	22.2	12.155	41.9155	179.133	69.0767	0.928608	2.273
Session 6	193 nm	MC-410-02_655_19	MC-410-02_655	McArthur River	Metamorphic muscovites	Altered	370.064	16.6593	9.33164	0.363252	0.829671	1649.7	19.3	4.13472	54.3572	303.141	116.896	0.315881	2.94769
Session 6	193 nm	MC-410-02_655_20	MC-410-02_655	McArthur River	Metamorphic muscovites	Altered	109.711	3.73969	3.2174	0.122966	0.600889	1627.9	24.8	7.4156	33.6127	161.182	62.1546	0.56653	1.82275
Session 6	193 nm	MC-410-02_655_21	MC-410-02_655	McArthur River	Metamorphic muscovites	Altered	174.234	7.29156	4.61733	0.223913	0.796793	1599	23.3	4.78187	31.1058	165.064	63.6514	0.365321	1.68681
Session 6	193 nm	MC-410-02_655_22	MC-410-02_655	McArthur River	Metamorphic muscovites	Altered	91.482	4.10972	2.82546	0.088313	0.785546	1643.7	17.4	10.0515	40.0103	182.174	70.2495	0.767904	2.16968
Session 6	193 nm	MC-410-02_655_23	MC-410-02_655	McArthur River	Metamorphic muscovites	Altered	83.8	5.04193	2.82725	0.118245	0.37315	1754.3	41.8	9.48936	37.7967	157.544	60.7516	0.72496	2.04964
Session 6	193 nm	MC-410-02_655_25	MC-410-02_655	McArthur River	Metamorphic muscovites	Preserved	83.8326	6.73539	2.99155	0.174414	0.69937	1854.4	41.7	9.48847	39.9895	157.59	60.7696	0.724892	2.16855
Session 6	193 nm	MC-410-02_655_28	MC-410-02_655	McArthur River	Metamorphic muscovites	Altered	69.7712	3.87215	2.39314	0.101931	0.564972	1694.1	31.9	16.8851	56.9278	233.4	90.0031	1.28998	3.08709
Session 6	193 nm	MC-410-02_655_29	MC-410-02_655	McArthur River	Metamorphic muscovites	Altered	84.9204	8.31373	2.80467	0.248022	0.88339	1723.7	35.6	9.92073	39.1993	166.908	64.3625	0.757915	2.12571
Session 6	193 nm	MC-410-02_655_30	MC-410-02_655	McArthur River	Metamorphic muscovites	Altered	58.9821	1.43143	2.00165	0.0482997	0.782729	1589.7	12	14.5253	40.9604	167.901	64.7455	1.09771	2.19724
Session 6	193 nm	MC-410-02_655_32	MC-410-02_655	McArthur River	Metamorphic muscovites	Altered	53.7377	1.25661	1.90864	0.0463494	0.544657	1610.4	16.3	14.9013	40.0682	158.644	61.1758	1.13842	2.17282
Session 6	193 nm	MC-410-02_655_33	MC-410-02_655	McArthur River	Metamorphic muscovites	Altered	61.4832	1.24064	2.0382	0.0519725	0.628497	1574.7	15.6	13.9445	40.0407	169.855	65.4992	1.06532	2.17133
Session 6	193 nm	MC-410-02_655_34	MC-410-02_655	McArthur River	Metamorphic muscovites	Altered	42.9748	0.70572	1.65946	0.0322896	0.675793	1606.3	11.7	18.1917	42.5295	154.884	59.7259	1.38979	2.3063
Session 6	193 nm	MC-410-02_655_35	MC-410-02_655	McArthur River	Metamorphic muscovites	Altered	51.5722	1.07019	1.87127	0.0354045	0.573023	1620.6	12.6	15.9123	41.9492	162.581	62.6941	1.21566	2.27483
Session 6	193 nm	MC-410-02_655_36	MC-410-02_655	McArthur River	Metamorphic muscovites	Altered	74.8726	1.78267	2.41238	0.0655112	0.771717	1625.6	14.2	11.6555	39.6122	172.892	66.67	0.890446	2.14809
Session 6	193 nm	MC-410-02_655_37	MC-410-02_655	McArthur River	Metamorphic muscovites	Altered	33.7845	0.705992	1.47371	0.0286345	0.716383	1631.3	11.2	25.7243	53.4082	172.18	66.3954	1.96526	2.89623
Session 6	193 nm	MC-410-02_655_38	MC-410-02_655	McArthur River	Metamorphic muscovites	Altered	75.9044	2.15622	2.43369	0.062244	0.727999	1624	14.1	11.6783	40.0405	175.618	67.7213	0.892192	2.17132
Session 6	193 nm	MC-410-02_655_39	MC-410-02_655	McArthur River	Metamorphic muscovites	Altered	57.1073	1.51181	2.05016	0.0453871	0.691301	1662.3	13.2	16.5263	47.7327	186.977	72.1016	1.26256	2.58845
Session 6	193 nm	MC-410-02_655_40	MC-410-02_655	McArthur River	Metamorphic muscovites	Altered	403.514	17.7756	9.59664	0.471684	0.925324	1566.6	14.9	3.88516	52.5267	310.59	119.769	0.296815	2.84842
Session 6	193 nm	MC-418_609,6_1	MC-418_609,6	McArthur River	Eearly hydrothermal muscovites	Altered	1022.34	95.479	22.5312	2.10361	0.958399	1515.16	20	2.32688	73.8603	471.291	181.738	0.177767	4.0053
Session 6	193 nm	MC-418_609,6_2	MC-418_609,6	McArthur River	Eearly hydrothermal muscovites	Altered	727.077	105.741	17.06	2.55163	0.994321	1593.35	14.48	2.91622	70.0895	420.07	161.986	0.222791	3.80082
Session 6	193 nm	MC-418_609,6_3	MC-418_609,6	McArthur River	Eearly hydrothermal muscovites	Altered	684.996	90.8171	15.6356	2.0852	0.984238	1546.68	18.35	3.39311	74.742	460.475	177.567	0.259224	4.05312
Session 6	193 nm	MC-418_609,6_4	MC-418_609,6	McArthur River	Eearly hydrothermal muscovites	Altered	742.38	78.4271	17.1846	1.88007	0.964704	1573.44	22.64	2.41353	58.4314	354.977	136.885	0.184387	3.16862
Session 6	193 nm	MC-418_609,6_5	MC-418_609,6	McArthur River	Eearly hydrothermal muscovites	Altered	1360.86	202.919	32.3613	4.84147	0.985481	1645.32	20.7	1.84394	89.3135	528.167	203.67	0.149664	4.8433
Session 6	193 nm	MC-418_609,6_6	MC-418_609,6	McArthur River	Eearly hydrothermal muscovites	Altered	920.973	101.222	22.8726	2.6129	0.97824	1699.73	20.42	2.4319	81.8098	463.239	178.633	0.193961	4.43639
Session 6	193 nm	MC-418_609,6_7	MC-418_609,6	McArthur River	Eearly hydrothermal muscovites	Altered	855.258	119.649	20.7086	2.92576	0.989402	1653.6	17.21	3.21814	99.2206	576.258	222.215	0.259822	5.38055
Session 6	193 nm	MC-418_609,6_8	MC-418_609,6	McArthur River	Eearly hydrothermal muscovites	Altered	669.205	70.5802	16.3247	1.69576	0.974952	1650.08	18.85	3.91822	93.8695	541.136	208.671	0.31182	5.09036
Session 6	193 nm	MC-418_609,6_9	MC-418_609,6	McArthur River	Eearly hydrothermal muscovites	Altered	673.136	55.8422	15.0271	1.17737	0.904704	1511.9	25.76	2.99342	63.3717	399.201	153.939	0.228689	3.43653
Session 6	193 nm	MC-418_609,6_10	MC-418_609,6	McArthur River	Eearly hydrothermal muscovites	Altered	1025.01	79.3565	24.3829	1.76553	0.919369	1634.16	24.04	2.66232	91.453	534.629	206.162	0.201131	4.90417
Session 6	193 nm	MC-418_609,6_11	MC-418_609,6	McArthur River	Eearly hydrothermal muscovites	Altered	1313.73	162.106	30.6446	3.67713	0.992198	1613.02	11.99	2.13092	91.997	554.617	213.87	0.162796	4.98882
Session 6	193 nm	MC-418_609,6_12	MC-418_609,6	McArthur River	Eearly hydrothermal muscovites	Altered	619.877	48.0226	15.5538	1.09846	0.97482	1690.86	13.8	3.94699	86.4877	484.721	186.917	0.301539	4.69006
Session 6	193 nm	MC-418_609,6_13	MC-418_609,6	McArthur River	Eearly hydrothermal muscovites	Altered	1311.42	151.352	30.7726	3.7009	0.985185	1622.44	17.17	2.20875	95.7553	573.862	221.291	0.168742	5.19263
Session 6	193 nm	MC-418_609,6_15	MC-418_609,6	McArthur River	Eearly hydrothermal muscovites	Altered	355.423	28.6759	8.75665	0.703059	0.900622	1604.82	27.73	4.75001	60.1238	343.179	132.336	0.372334	3.2604
Session 6	193 nm	MC-418_609,6_16	MC-418_609,6	McArthur River	Eearly hydrothermal muscovites	Altered	413.475	44.6174	9.93243	1.11666	0.979404	1582.66	19.31	5.00259	70.0008	409.793	158.023	0.382184	3.79601
Session 6	193 nm	MC-418_609,6_17	MC-418_609,6	McArthur River	Eearly hydrothermal muscovites	Altered	660.995	41.6364	16.0843	0.929254	0.913287	1645.13	20.07	2.78216	63.0432	364.336	140.494	0.212549	3.41871
Session 6	193 nm	MC-418_609,6_18	MC-418_609,6	McArthur River	Eearly hydrothermal muscovites	Altered	393.938	79.9683	9.77864	2.00102	0.984376	1629.31	30.89	5.35471	73.7679	417.911	161.154	0.409084	4.00029
Session 6	193 nm	MC-418_609,6_19	MC-418_609,6	McArthur River	Eearly hydrothermal muscovites	Altered	337.497	36.3373	8.86556	0.792092	0.972197	1702.7	20.21	4.95303	61.8628	331.178	127.708	0.378397	3.3547
Session 6	193 nm	MC-418_609,6_20	MC-418_609,6	McArthur River	Eearly hydrothermal muscovites	Altered	278.257	35.511	7.16761	0.862832	0.982179	1641.21	18.55	5.37039	54.2292	296.056	114.164	0.410282	2.94075
Session 6	193 nm	MC-418_609,6_21	MC-418_609,6	McArthur River	Eearly hydrothermal muscovites	Altered	329.368	13.5127	8.48425	0.392644	0.70298	1666.67	27.42	5.7111	68.263	372.668	143.707	0.436312	3.70177
Session 6	193 nm	MC-418_609,6_22	MC-418_609,6	McArthur River	Eearly hydrothermal muscovites	Altered	337.386	19.6092	8.21159	0.401225	0.829971	1578.95	23.48	5.13423	59.3957	343.18	132.336	0.39224	3.22092
Session 6	193 nm	MC-418_609,6_23	MC-418_609,6	McArthur River	Eearly hydrothermal muscovites	Altered	362.176	26.3386	8.73825	0.442218	0.785683	1574.26	32.32	5.22054	64.2676	374.59	144.448	0.398834	3.48511
Session 6	193 nm	MC-418_609,6_24	MC-418_609,6	McArthur River	Eearly hydrothermal muscovites	Altered	260.551	18.2656	6.8828	0.248813	0.676612	1671.44	38.49	7.40444	71.7975	382.213	147.388	0.565677	3.89344
Session 6	193 nm	MC-418_609,6_25	MC-418_609,6	McArthur River	Eearly hydrothermal muscovites	Altered	700.401	54.8946	16.9867	0.787025	0.763717	1643.81	40.39	3.1268	74.8277	433.877	167.311	0.238878	4.05776
Session 6	193 nm	MC-418_609,6_26	MC-418_609,6	McArthur River	Eearly hydrothermal muscovites	Altered	875.187	120.771	20.8945	2.51373	0.986202	1631.98	19.95	2.80004	82.4229	485.496	187.216	0.213915	4.46964
Session 6	193 nm	MC-418_609,6_27	MC-418_609,6	McArthur River	Eearly hydrothermal muscovites	Altered	366.626	21.1128	9.31624	0.371692	0.622117	1658.61	34.56	5.75884	75.5838	418.292	161.301	0.439959	4.09876
Session 6	193 nm	MC-418_609,6_28	MC-418_609,6	McArthur River	Eearly hydrothermal muscovites	Altered	798.425	40.0996	19.0031	0.869796	0.805547	1621.78	23.62	2.71876	72.7861	430.057	165.837	0.207706	3.94705
Session 6	193 nm	MC-418_609,6_29	MC-418_609,6	McArthur River	Eearly hydrothermal muscovites	Altered	782.025	69.0811	18.8032	1.46866	0.872727	1636.93	33.73	2.81446	74.5554	436.05	168.148	0.215017	4.043
Session 6	193 nm	MC-418_609,6_30	MC-418_609,6	McArthur River	Eearly hydrothermal muscovites	Altered	497.711	22.456	12.3772	0.495422	0.769625	1656.98	23.02	3.65641	63.7571	360.539	139.03	0.279339	3.45743
Session 6	193 nm	MC-418_609,6_31	MC-418_609,6	McArthur River	Eearly hydrothermal muscovites	Altered	85.044	17.5236	2.56118	0.327315	0.977024	1565.87	29.42	23.841	86.0233	401.687	154.898	1.82138	4.66488
Session 6	193 nm	MC-418_609,6_32	MC-418_609,6	McArthur River	Eearly hydrothermal muscovites	Altered	789.552	61.7912	18.1557	1.51071	0.954142	1566.82	19.56	2.64586	67.6755	413.874	159.597	0.202136	3.66991
Session 6	193 nm	MC-418_609,6_33	MC-418_609,6	McArthur River	Eearly hydrothermal muscovites	Altered	1600.75	210.865	36.5995	4.75345	0.986059	1587.83	16.99	1.71037	93.386	574.38	221.491	0.138366	5.06415
Session 6	193 nm	MC-418_609,6_34	MC-418_609,6	McArthur River	Eearly hydrothermal muscovites	Altered	347.58	35.4268	8.5695	0.804293	0.966036	1603.09	19.37	4.56176	58.8748	335.812	129.495	0.372562	3.19267
Session 6	193 nm	MC-418_609,6_35	MC-418_609,6	McArthur River	Eearly hydrothermal muscovites	Altered	287.224	16.6026	7.20376	0.383064	0.891918	1603.4	19.44	5.34143	55.7627	312.661	120.567	0.419767	3.02391
Session 7	193 nm	MC-408-611,4_1	MC-408_611,4	McArthur River	Eearly hydrothermal muscovites	Altered	408.956	39.0235	10.6953	0.895178	0.892978	1764.1	35.8	6.72231	46.0524	228.654	88.173	0.215605	2.30597
Session 7	193 nm	MC-408-611,4_10	MC-408_611,4	McArthur River	Eearly hydrothermal muscovites	Altered	145.157	10.4836	3.92433	0.146099	0.479804	1684.5	46.8	28.8412	56.8024	164.514	63.4396	0.437042	1.7151
Session 7	193 nm	MC-408-611,4_11	MC-408_611,4	McArthur River	Eearly hydrothermal muscovites	Altered	255.433	18.9576	6.60676	0.338953	0.822307	1698.8	33.2	33.7432	63.6727	180.342	69.5428	0.272254	1.79872
Session 7	193 nm	MC-408-611,4_12	MC-408_611,4	McArthur River	Eearly hydrothermal muscovites	Altered	282.26	24.7296	7.10006	0.460981	0.82094	1663.8	38.5	47.1824	83.5795	218.019	84.0717	0.297852	2.11477
Session 7	193 nm	MC-408-611,4_13	MC-408_611,4	McArthur River	Eearly hydrothermal muscovites	Preserved	259.943	25.7489	7.11098	0.568068	0.906328	1797.7	34.7	75.147	120.2	263.343	101.549	0.390661	2.77798
Session 7	193 nm	MC-408-611,4_15	MC-408_611,4	McArthur River	Eearly hydrothermal muscovites	Altered	152.497	12.0695	4.09956	0.23493	0.855919	1684.6	30.3	50.8034	89.1622	221.817	85.5364	0.560904	2.29946
Session 7	193 nm	MC-408-611,4_16	MC-408_611,4	McArthur River	Eearly hydrothermal muscovites	Altered	181.827	11.2711	4.84068	0.224023	0.806078	1699.4	27.8	61.112	105.224	263.039	101.432	0.557852	2.70038
Session 7	193 nm	MC-408-611,4_17	MC-408_611,4	McArthur River	Eearly hydrothermal muscovites	Altered	205.859	14.3885	5.54037	0.251256	0.740249	1737.3	36.9	13.8676	62.8684	289.649	111.694	0.542573	3.00605
Session 7	193 nm	MC-408-611,4_18	MC-408_611,4	McArthur River	Eearly hydrothermal muscovites	Altered	126.472	10.493	3.55896	0.184611	0.897725	1722.5	29	2.78292	50.4025	299.577	115.522	0.913417	3.25082
Session 7	193 nm	MC-408-611,4_19	MC-408_611,4	McArthur River	Eearly hydrothermal muscovites	Altered	146.652	9.81706	3.98116	0.172752	0.837248	1693.4	27.5	4.77724	61.1818	322.713	124.444	0.848566	3.37828
Session 7	193 nm	MC-408-611,4_21	MC-408_611,4	McArthur River	Eearly hydrothermal muscovites	Altered	209.171	12.8969	5.4424	0.226192	0.798847	1682.5	28.3	4.86141	54.2247	301.856	116.401	0.556488	3.02863
Session 7	193 nm	MC-408-611,4_23	MC-408_611,4	McArthur River	Eearly hydrothermal muscovites	Altered	206.615	18.317	5.19918	0.340641	0.829687	1626.1	36.4	10.0894	51.4571	256.819	99.0339	0.479317	2.49206
Session 7	193 nm	MC-408-611,4_24	MC-408_611,4	McArthur River	Eearly hydrothermal muscovites	Altered	162.866	12.0526	4.31599	0.265129	0.878447	1672.9	26.2	13.7056	32.3984	147.793	56.9916	0.349929	1.51029
Session 7	193 nm	MC-408-611,4_25	MC-408_611,4	McArthur River	Eearly hydrothermal muscovites	Altered	315.553	25.1741	8.04899	0.511812	0.901496	1698.4	27.5	8.20095	46.4829	242.475	93.5025	0.296313	2.38502
Session 7	193 nm	MC-408-611,4_26	MC-408_611,4	McArthur River	Eearly hydrothermal muscovites	Altered	234.149	16.8419	5.97204	0.339665	0.787937	1664.7	33.8	7.22583	53.1994	277.882	107.156	0.45764	2.73305
Session 7	193 nm	MC-408-611,4_27	MC-408_611,4	McArthur River	Eearly hydrothermal muscovites	Altered	78.8963	5.30935	2.3099	0.113242	0.782658	1658.6	28.1	3.62665	42.7539	236.57	91.2256	1.15627	2.67087
Session 7	193 nm	MC-408-611,4_28	MC-408_611,4	McArthur River	Eearly hydrothermal muscovites	Altered	223.229	19.1683	5.81908	0.391689	0.923613	1694.7	25.8	8.07311	36.9799	196.351	75.7163	0.339187	1.97376
Session 7	193 nm	MC-408-611,4_29	MC-408_611,4	McArthur River	Eearly hydrothermal muscovites	Preserved	239.742	18.5316	6.4471	0.460596	0.881694	1757.3	30.2	10.8611	36.3149	181.61	70.0321	0.292114	1.88329
Session 7	193 nm	MC-408-611,4_30	MC-408_611,4	McArthur River	Eearly hydrothermal muscovites	Altered	356.624	30.4313	8.72081	0.605643	0.880468	1640	31.1	10.4012	33.3775	167.615	64.6353	0.181242	1.58058
Session 7	193 nm	MC-408-611,4_31	MC-408_611,4	McArthur River	Eearly hydrothermal muscovites	Altered	191.991	15.418	5.04556	0.32517	0.866294	1686.4	30.3	6.20644	61.114	342.314	132.002	0.687545	3.46905
Session 7	193 nm	MC-408-611,4_32	MC-408_611,4	McArthur River	Eearly hydrothermal muscovites	Altered	726.114	57.0141	17.8237	1.19031	0.846591	1690.5	34	6.37431	37.6498	202.248	77.9902	0.107408	1.9144
Session 7	193 nm	MC-408-611,4_33	MC-408_611,4	McArthur River	Eearly hydrothermal muscovites	Altered	250.097	28.1367	6.55569	0.575724	0.90959	1718.7	37.3	7.66293	37.6259	187.614	72.3473	0.289277	1.89641
Session 7	193 nm	MC-408-611,4_35	MC-408_611,4	McArthur River	Eearly hydrothermal muscovites	Altered	146.827	10.1065	4.10022	0.184164	0.463636	1741.6	48.5	9.53005	58.3342	294.295	113.485	0.772919	3.16914
Session 7	193 nm	MC-408-611,4_36	MC-408_611,4	McArthur River	Eearly hydrothermal muscovites	Altered	232.111	16.819	5.96398	0.293549	0.833767	1675.8	31	7.79231	25.2098	123.466	47.6108	0.20512	1.22334
Session 7	193 nm	MC-408-611,4_37	MC-408_611,4	McArthur River	Eearly hydrothermal muscovites	Altered	134.722	8.58654	3.7549	0.139457	0.615662	1720.3	37.3	8.4821	38.9497	205.05	79.0709	0.586918	2.20382
Session 7	193 nm	MC-408-611,4_38	MC-408_611,4	McArthur River	Eearly hydrothermal muscovites	Altered	273.033	23.2999	6.81663	0.387842	0.856605	1647.9	34.7	10.7124	32.7392	155	59.7705	0.218913	1.49225
Session 7	193 nm	MC-408-611,4_39	MC-408_611,4	McArthur River	Eearly hydrothermal muscovites	Altered	371.393	29.2571	9.21953	0.465154	0.780098	1667.9	39.1	20.6708	35.5092	105.895	40.8351	0.109951	1.0137
Session 7	193 nm	MC-408-611,4_40	MC-408_611,4	McArthur River	Eearly hydrothermal muscovites	Altered	415.897	26.8157	10.4529	0.501145	0.786178	1697.5	31.9	9.86716	31.8398	153.93	59.3582	0.142723	1.49187
Session 7	193 nm	MC-408-611,4_41	MC-408_611,4	McArthur River	Eearly hydrothermal muscovites	Altered	255.695	20.9337	6.13497	0.315139	0.763636	1577.3	38.6	6.11579	33.278	174.528	67.3009	0.263208	1.61477
Session 7	193 nm	MC-408-611,4_42	MC-408_611,4	McArthur River	Eearly hydrothermal muscovites	Altered	301.472	18.7048	7.70959	0.339528	0.913904	1698.1	21.3	7.48114	22.9324	101.619	39.1859	0.129982	1.00211
Session 7	193 nm	MC-408-611,4_43	MC-408_611,4	McArthur River	Eearly hydrothermal muscovites	Altered	281.972	17.2848	6.93483	0.304741	0.786882	1627	28.5	12.736	29.299	113.108	43.6163	0.154683	1.0727
Session 7	193 nm	MC-410-02-687,4_1	MC-410-02_687,4	McArthur River	Eearly hydrothermal muscovites	Altered	172.768	9.97131	4.8614	0.205735	0.858596	1678.3	20.7	16.9295	43.5184	162.089	62.5044	0.361783	1.75877
Session 7	193 nm	MC-410-02-687,4_2	MC-410-02_687,4	McArthur River	Eearly hydrothermal muscovites	Altered	53.5447	2.90687	1.96027	0.053997	0.803934	1619.2	16.2	17.7085	35.9018	114.798	44.2681	0.826751	1.62066
Session 7	193 nm	MC-410-02-687,4_3	MC-410-02_687,4	McArthur River	Eearly hydrothermal muscovites	Altered	51.0825	3.28688	1.78466	0.0578397	0.768097	1518.9	19.1	7.40166	31.454	150.402	57.9976	1.13537	2.02625
Session 7	193 nm	MC-410-02-687,4_4	MC-410-02_687,4	McArthur River	Eearly hydrothermal muscovites	Altered	87.5125	11.0122	2.78882	0.247405	0.974017	1649.2	17	49.4283	84.2134	205.029	79.0626	0.903444	2.51954
Session 7	193 nm	MC-410-02-687,4_5	MC-410-02_687,4	McArthur River	Eearly hydrothermal muscovites	Altered	38.1101	1.95824	1.59239	0.029647	0.544496	1604.6	18.8	20.3862	48.7606	173.031	66.7236	1.75081	2.78797
Session 7	193 nm	MC-410-02-687,4_6	MC-410-02_687,4	McArthur River	Eearly hydrothermal muscovites	Altered	32.361	1.48328	1.44175	0.028482	0.266149	1582.6	20.4	23.4059	48.9897	156.616	60.3939	1.86626	2.69068
Session 7	193 nm	MC-410-02-687,4_7	MC-410-02_687,4	McArthur River	Eearly hydrothermal muscovites	Altered	28.645	1.31288	1.37574	0.0223228	0.334281	1602.2	17.6	17.4694	42.4391	154.757	59.677	2.08333	2.86612
Session 7	193 nm	MC-410-02-687,4_8	MC-410-02_687,4	McArthur River	Eearly hydrothermal muscovites	Altered	42.5041	2.21844	1.63371	0.0374762	0.653	1549.9	17.5	19.5855	40.3803	126.588	48.8144	1.14846	1.87626
Session 7	193 nm	MC-410-02-687,4_9	MC-410-02_687,4	McArthur River	Eearly hydrothermal muscovites	Altered	30.6584	1.67363	1.42978	0.0260381	0.430928	1611.6	19.9	12.1338	49.9734	226.859	87.4807	2.8534	4.07972
Session 7	193 nm	MC-410-02-687,4_10	MC-410-02_687,4	McArthur River	Eearly hydrothermal muscovites	Altered	28.9729	1.65259	1.39759	0.0257525	0.498554	1618.7	19.2	12.3688	44.5944	200.319	77.2465	2.66617	3.72621
Session 7	193 nm	MC-410-02-687,4_11	MC-410-02_687,4	McArthur River	Eearly hydrothermal muscovites	Altered	27.1463	1.30649	1.33904	0.0234489	0.295045	1598.9	18.8	3.8907	11.0623	57.2856	22.0903	0.813751	1.08964
Session 7	193 nm	MC-410-02-687,4_12	MC-410-02_687,4	McArthur River	Eearly hydrothermal muscovites	Altered	23.4701	1.19617	1.25703	0.0189162	0.675388	1600.3	12.6	8.83781	28.6075	129.615	49.9818	2.1296	2.67697
Session 7	193 nm	MC-410-02-687,4_13	MC-410-02_687,4	McArthur River	Eearly hydrothermal muscovites	Altered	17.7996	0.894509	1.13506	0.0215202	0.449404	1609	15.4	12.7422	51.2914	236.459	91.1828	5.12274	5.81463
Session 7	193 nm	MC-410-02-687,4_14	MC-410-02_687,4	McArthur River	Eearly hydrothermal muscovites	Altered	25.5514	1.72869	1.29333	0.0203684	0.12087	1587.2	25.2	9.24387	25.4262	106.921	41.2306	1.61363	2.08695
Session 7	193 nm	MC-410-02-687,4_15	MC-410-02_687,4	McArthur River	Eearly hydrothermal muscovites	Altered	22.177	1.18562	1.24542	0.0182225	0.305607	1623	17.9	9.68349	39.1324	176.122	67.9157	3.06244	3.81401
Session 7	193 nm	MC-410-02-687,4_16	MC-410-02_687,4	McArthur River	Eearly hydrothermal muscovites	Altered	21.8623	1.1042	1.22185	0.02322	0.513877	1601.8	15.4	112.273	131.511	110.786	42.7209	1.95409	2.3876
Session 7	193 nm	MC-410-02-687,4_17	MC-410-02_687,4	McArthur River	Eearly hydrothermal muscovites	Altered	106.089	7.32986	3.21704	0.0800496	0.501129	1646.8	37.4	14.1877	36.7575	143.623	55.3837	0.522049	1.67945
Session 7	193 nm	MC-410-02-687,4_18	MC-410-02_687,4	McArthur River	Eearly hydrothermal muscovites	Altered	546.776	44.6946	12.8523	0.599398	0.876256	1571.6	33.2	32.7688	55.0889	148.435	57.2391	0.104685	1.34543
Session 7	193 nm	MC-410-02-687,4_20	MC-410-02_687,4	McArthur River	Eearly hydrothermal muscovites	Altered	582.688	49.9569	14.4714	1.02113	0.931486	1665.1	24.7	24.6491	49.0744	149.379	57.6032	0.0988576	1.43061
Session 7	193 nm	MC-410-02-687,4_21	MC-410-02_687,4	McArthur River	Eearly hydrothermal muscovites	Altered	315.384	25.6848	7.9152	0.441097	0.977248	1611.9	18.1	21.8429	53.1721	194.938	75.1715	0.238349	1.88658
Session 7	193 nm	MC-410-02-687,4_22	MC-410-02_687,4	McArthur River	Eearly hydrothermal muscovites	Altered	256.184	16.268	6.59352	0.252525	0.750399	1618.4	30	8.92229	51.8487	247.042	95.2638	0.371857	2.45184
Session 7	193 nm	MC-410-02-687,4_23	MC-410-02_687,4	McArthur River	Eearly hydrothermal muscovites	Altered	129.29	9.50816	3.61916	0.184682	0.859251	1587	23.7	5.36601	29.9671	148.059	57.0942	0.441599	1.59822
Session 7	193 nm	MC-410-02-687,4_24	MC-410-02_687,4	McArthur River	Eearly hydrothermal muscovites	Altered	54.7719	3.10503	1.67746	0.0422301	0.478688	1368.5	22	3.28027	31.5061	168.932	65.143	1.18935	1.99509
Session 7	193 nm	MC-410-02-687,4_25	MC-410-02_687,4	McArthur River	Eearly hydrothermal muscovites	Altered	150.177	8.81874	4.02213	0.13918	0.800618	1561.9	22.6	5.1547	41.0155	229.766	88.6017	0.589981	2.37298
Session 7	193 nm	MC-410-02-687,4_26	MC-410-02_687,4	McArthur River	Eearly hydrothermal muscovites	Altered	195.332	15.4717	5.22452	0.269509	0.814559	1625.4	31.9	11.1781	42.5503	185.353	71.4752	0.365916	1.91174
Session 7	193 nm	MC-410-02-687,4_27	MC-410-02_687,4	McArthur River	Eearly hydrothermal muscovites	Altered	331.327	24.989	8.3656	0.490049	0.923212	1628.7	21.6	8.12824	44.2751	219.456	84.6262	0.255416	2.13671
Session 7	193 nm	MC-410-02-687,4_28	MC-410-02_687,4	McArthur River	Eearly hydrothermal muscovites	Altered	123.536	7.37939	3.25051	0.147181	0.815019	1479.2	20.7	19.6867	48.4888	169.659	65.4233	0.529589	1.72144
Session 7	193 nm	MC-410-02-687,4_29	MC-410-02_687,4	McArthur River	Eearly hydrothermal muscovites	Altered	84.9314	4.71243	2.37268	0.0902203	0.773241	1436.2	18.8	28.602	57.9377	167.342	64.53	0.759789	1.80273
Session 7	193 nm	MC-410-02-687,4_30	MC-410-02_687,4	McArthur River	Eearly hydrothermal muscovites	Altered	81.8526	4.78791	2.27718	0.0849893	0.617747	1415.9	24.5	15.9848	54.1607	235.217	90.7037	1.10814	2.52343
Session 7	193 nm	MC-410-02-687,4_31	MC-410-02_687,4	McArthur River	Eearly hydrothermal muscovites	Altered	280.146	15.5321	6.98755	0.242914	0.784282	1583.9	24.4	6.26661	49.493	251.542	96.999	0.346245	2.4194
Session 7	193 nm	MC-410-02-687,4_32	MC-410-02_687,4	McArthur River	Eearly hydrothermal muscovites	Altered	161.158	9.39553	4.19137	0.125002	0.633696	1535.5	28.6	14.1374	51.1958	226.525	87.352	0.542028	2.27184
Session 7	193 nm	MC-410-02-687,4_33	MC-410-02_687,4	McArthur River	Eearly hydrothermal muscovites	Altered	124.358	8.53242	3.48432	0.165804	0.903185	1576.2	18.3	10.2279	57.492	282.491	108.933	0.875968	3.05216
Session 7	193 nm	MC-410-02-687,4_34	MC-410-02_687,4	McArthur River	Eearly hydrothermal muscovites	Altered	190.779	12.2028	4.97583	0.217869	0.850467	1580.1	22.6	32.5072	71.3956	225.171	86.8297	0.455133	2.26466
Session 7	193 nm	MC-410-02-687,4_36	MC-410-02_687,4	McArthur River	Eearly hydrothermal muscovites	Altered	80.4793	4.84428	2.29578	0.0892057	0.808982	1444.5	18.3	6.54801	44.04	220.97	85.21	1.05878	2.43073
Session 7	193 nm	MC-410-02-687,4_37	MC-410-02_687,4	McArthur River	Eearly hydrothermal muscovites	Altered	122.789	9.75978	3.25858	0.142645	0.683354	1489.9	33.9	31.2961	69.7445	225.302	86.8802	0.707558	2.30563
Session 7	193 nm	MC-410-02-687,4_38	MC-410-02_687,4	McArthur River	Eearly hydrothermal muscovites	Altered	73.4929	4.00232	2.16875	0.065366	0.785038	1454.8	16.9	13.0454	43.4064	178.339	68.7707	0.935746	2.02939
Session 7	193 nm	MC-410-02-687,4_39	MC-410-02_687,4	McArthur River	Eearly hydrothermal muscovites	Altered	79.2381	4.2068	2.28984	0.0790107	0.720146	1456.7	19.6	1.98506	28.3799	159.006	61.3154	0.773813	1.77191
Session 7	193 nm	MC-410-02-656,9_1	MC-410-02_656,9	McArthur River	Eearly hydrothermal muscovites	Altered	144.948	17.2193	3.86128	0.398849	0.951598	1554.6	24.4	2.37046	36.4533	203.008	78.2833	0.540077	2.08539
Session 7	193 nm	MC-410-02-656,9_2	MC-410-02_656,9	McArthur River	Eearly hydrothermal muscovites	Altered	68.9933	14.3762	2.17525	0.31366	0.967622	1541.9	28	2.35818	21.6832	118.051	45.5226	0.659812	1.43526
Session 7	193 nm	MC-410-02-656,9_3	MC-410-02_656,9	McArthur River	Eearly hydrothermal muscovites	Altered	45.1088	3.49896	1.63248	0.0730131	0.804238	1521.1	21.4	3.03705	25.0088	135.326	52.184	1.15685	1.88853
Session 7	193 nm	MC-410-02-656,9_4	MC-410-02_656,9	McArthur River	Eearly hydrothermal muscovites	Altered	48.6307	4.52775	1.82412	0.0794266	0.767415	1623.2	29.3	3.74511	35.6362	191.36	73.7916	1.51739	2.7679
Session 7	193 nm	MC-410-02-656,9_5	MC-410-02_656,9	McArthur River	Eearly hydrothermal muscovites	Altered	32.9271	3.7278	1.43867	0.0633233	0.840697	1595.5	25.3	2.64614	31.1171	168.18	64.853	1.96959	2.83359
Session 7	193 nm	MC-410-02-656,9_6	MC-410-02_656,9	McArthur River	Eearly hydrothermal muscovites	Altered	103.211	21.2453	3.0156	0.498032	0.963397	1591.6	34.8	2.57178	28.0327	149.907	57.8066	0.560082	1.68898
Session 7	193 nm	MC-410-02-656,9_7	MC-410-02_656,9	McArthur River	Eearly hydrothermal muscovites	Altered	21.0688	1.58962	1.20902	0.0323199	0.504981	1646.3	23.4	4.05054	24.1419	121.368	46.8017	2.22137	2.68568
Session 7	193 nm	MC-410-02-656,9_8	MC-410-02_656,9	McArthur River	Eearly hydrothermal muscovites	Altered	43.1111	2.31689	1.69731	0.0382199	0.412716	1623	24.1	4.68061	25.8846	133.764	51.5816	1.19648	2.03079
Session 7	193 nm	MC-410-02-656,9_9	MC-410-02_656,9	McArthur River	Eearly hydrothermal muscovites	Altered	33.987	2.04904	1.48527	0.0377473	0.635654	1620	20	2.78916	25.9678	140.265	54.0887	1.59145	2.36374
Session 7	193 nm	MC-410-02-656,9_10	MC-410-02_656,9	McArthur River	Eearly hydrothermal muscovites	Altered	44.996	2.71919	1.72391	0.0493716	0.650882	1607.7	22	2.86452	28.6607	159.184	61.3842	1.36422	2.35179
Session 7	193 nm	MC-410-02-656,9_11	MC-410-02_656,9	McArthur River	Eearly hydrothermal muscovites	Altered	32.829	3.13733	1.46306	0.0663608	0.817082	1624.8	23.2	2.90364	29.0968	148.6	57.3027	1.74549	2.55375
Session 7	193 nm	MC-410-02-656,9_12	MC-410-02_656,9	McArthur River	Eearly hydrothermal muscovites	Altered	94.9641	6.22576	2.92259	0.125845	0.921631	1643	15.7	2.43434	18.445	102.698	39.6021	0.417021	1.21878
Session 7	193 nm	MC-410-02-656,9_13	MC-410-02_656,9	McArthur River	Eearly hydrothermal muscovites	Altered	82.2612	5.11378	2.55846	0.0750088	0.768224	1600.3	23.3	5.13906	29.6888	154.292	59.4977	0.723278	1.85048
Session 7	193 nm	MC-410-02-656,9_14	MC-410-02_656,9	McArthur River	Eearly hydrothermal muscovites	Altered	74.7858	5.59934	2.01764	0.132106	0.688258	1353.6	32.3	4.99311	34.0605	178.742	68.9261	0.921648	1.85955
Session 7	193 nm	MC-410-02-656,9_15	MC-410-02_656,9	McArthur River	Eearly hydrothermal muscovites	Altered	74.4925	4.7426	2.29701	0.0731934	0.30994	1543.3	35.4	4.45395	34.7742	180.515	69.6098	0.934454	2.14645
Session 7	193 nm	MC-410-02-656,9_16	MC-410-02_656,9	McArthur River	Eearly hydrothermal muscovites	Altered	94.2572	6.01751	2.85646	0.0882618	0.845853	1615.2	21.9	7.05966	35.4063	175.783	67.7851	0.719151	2.05422
Session 7	193 nm	MC-410-02-656,9_17	MC-410-02_656,9	McArthur River	Eearly hydrothermal muscovites	Altered	58.7504	3.55778	1.95189	0.0647946	0.787612	1541.7	18.7	5.0589	28.3817	146.063	56.3245	0.958709	1.87129
Session 7	193 nm	MC-410-02-656,9_18	MC-410-02_656,9	McArthur River	Eearly hydrothermal muscovites	Altered	92.3812	4.3934	2.86768	0.0715361	0.593151	1645.9	23.5	3.97047	41.482	219.816	84.765	0.917557	2.63126
Session 7	193 nm	MC-410-02-656,9_19	MC-410-02_656,9	McArthur River	Eearly hydrothermal muscovites	Altered	5.01198	0.345011	0.831213	0.014373	0.355357	1638.1	13.4	3.80874	28.9228	159.098	61.3509	12.2408	10.1747
Session 7	193 nm	MC-410-02-656,9_20	MC-410-02_656,9	McArthur River	Eearly hydrothermal muscovites	Altered	51.4178	3.65569	1.83848	0.0735991	0.7818	1581.1	22	7.47723	43.4908	212.059	81.7735	1.59037	2.92388
Session 7	193 nm	MC-410-02-656,9_21	MC-410-02_656,9	McArthur River	Eearly hydrothermal muscovites	Altered	23.0079	1.26915	1.19297	0.0242944	0.55695	1566.9	16.2	3.34999	24.5443	136.271	52.5484	2.28392	2.72466
Session 7	193 nm	MC-410-02-656,9_22	MC-410-02_656,9	McArthur River	Eearly hydrothermal muscovites	Altered	33.9131	2.83796	1.45026	0.071775	0.717054	1584.1	27.8	3.79835	23.1019	121.794	46.9657	1.38488	2.00844
Session 7	193 nm	MC-410-02-656,9_23	MC-410-02_656,9	McArthur River	Eearly hydrothermal muscovites	Altered	30.7816	2.1586	1.4128	0.0461477	0.810253	1621.1	16.8	3.42871	38.8906	213.011	82.1406	2.6685	3.77006
Session 7	193 nm	MC-410-02-656,9_24	MC-410-02_656,9	McArthur River	Eearly hydrothermal muscovites	Altered	45.3302	3.67312	1.72743	0.0738958	0.766411	1603.9	25	3.55592	29.926	163.924	63.212	1.39448	2.40886
Session 7	193 nm	MC-410-02-656,9_25	MC-410-02_656,9	McArthur River	Eearly hydrothermal muscovites	Altered	142.615	17.0675	4.12371	0.371235	0.967303	1681.1	21.2	4.01622	13.0733	62.3839	24.0563	0.16868	0.69559
Session 7	193 nm	MC-410-02-656,9_26	MC-410-02_656,9	McArthur River	Eearly hydrothermal muscovites	Altered	140.148	8.75622	3.96296	0.15083	0.748515	1639.4	27.5	4.40399	36.1138	193.551	74.6365	0.532556	2.1105
Session 7	193 nm	MC-410-02-656,9_27	MC-410-02_656,9	McArthur River	Eearly hydrothermal muscovites	Altered	257.336	16.9887	6.81573	0.268999	0.615615	1672.8	38.5	4.53401	41.1927	218.912	84.4161	0.328039	2.23582
Session 7	193 nm	MC-410-02-656,9_28	MC-410-02_656,9	McArthur River	Eearly hydrothermal muscovites	Altered	226.404	22.8424	5.64641	0.402039	0.887281	1553.7	32	2.15987	26.5434	151.648	58.4781	0.258291	1.45842
Session 7	193 nm	MC-410-02-656,9_29	MC-410-02_656,9	McArthur River	Eearly hydrothermal muscovites	Altered	84.2237	4.09477	2.70124	0.0845692	0.691891	1660.1	21.8	4.63916	32.9854	175.355	67.6199	0.802861	2.16872
Session 7	193 nm	MC-410-02-656,9_30	MC-410-02_656,9	McArthur River	Eearly hydrothermal muscovites	Altered	137.137	10.5125	3.86536	0.184933	0.858394	1627.8	26.3	1.85975	46.7117	265.863	102.521	0.747585	2.88969
Session 7	193 nm	MC-410-02-656,9_31	MC-410-02_656,9	McArthur River	Eearly hydrothermal muscovites	Altered	43.7729	2.2794	1.74781	0.0384173	0.627767	1656.1	19.6	3.55086	32.8039	174.84	67.4213	1.54025	2.69208
Session 7	193 nm	MC-410-02-656,9_32	MC-410-02_656,9	McArthur River	Eearly hydrothermal muscovites	Altered	29.7174	1.55894	1.43745	0.026544	0.688593	1677.7	15.5	2.9047	6.33384	23.7958	9.17608	0.308778	0.443853
Session 7	193 nm	MC-410-02-656,9_33	MC-410-02_656,9	McArthur River	Eearly hydrothermal muscovites	Altered	74.7417	4.70655	2.40438	0.06978	0.73626	1610.8	24.2	10.046	58.0461	290.399	111.983	1.49827	3.60241
Session 7	193 nm	MC-410-02-656,9_34	MC-410-02_656,9	McArthur River	Eearly hydrothermal muscovites	Altered	203.882	13.5236	5.54434	0.179651	0.732833	1670.6	33.4	4.03001	33.87	184.162	71.0162	0.34832	1.9312
Session 7	193 nm	MC-410-02-656,9_35	MC-410-02_656,9	McArthur River	Eearly hydrothermal muscovites	Altered	81.3856	6.30611	2.56975	0.103518	0.826866	1619.6	25.8	7.24527	38.3377	192.173	74.1052	0.910544	2.33987
Session 7	193 nm	MC-410-02-656,9_36	MC-410-02_656,9	McArthur River	Eearly hydrothermal muscovites	Altered	140.287	8.33061	3.98884	0.110099	0.818362	1648.6	24.9	3.93473	37.797	211.509	81.5616	0.58139	2.31907
Session 7	193 nm	MC-410-02-656,9_37	MC-410-02_656,9	McArthur River	Eearly hydrothermal muscovites	Altered	35.1831	1.9474	1.55854	0.0332002	0.544656	1668.6	20.8	3.1989	41.5606	233.901	90.1964	2.56363	3.99553
Session 7	193 nm	MC-410-02-656,9_38	MC-410-02_656,9	McArthur River	Eearly hydrothermal muscovites	Altered	38.1569	2.37609	1.64401	0.0416182	0.551	1684.1	24.5	2.55012	37.5638	208.807	80.5195	2.11022	3.46924
Session 7	193 nm	MC-410-02-656,9_39	MC-410-02_656,9	McArthur River	Eearly hydrothermal muscovites	Altered	171.406	9.92472	4.7727	0.160447	0.736809	1668.9	27.4	4.07645	35.2426	205.212	79.1333	0.461672	2.20342
Session 7	193 nm	MC-410-02-656,9_40	MC-410-02_656,9	McArthur River	Eearly hydrothermal muscovites	Altered	36.5659	2.00471	1.58142	0.0302392	0.504002	1658.5	21.3	3.70374	40.2388	219.829	84.7699	2.31828	3.66617
Session 7	193 nm	MC-410-02-656,9_41	MC-410-02_656,9	McArthur River	Eearly hydrothermal muscovites	Altered	69.4371	4.56988	2.36115	0.0790951	0.671962	1664.9	27.9	2.59706	25.3799	144.174	55.5959	0.800667	1.89049
Session 8	193 nm	MC-408-01-670,3_1	MC-408-01_670,3	McArthur River	Eearly hydrothermal muscovites	Altered	188.846	14.2668	5.19925	0.341144	0.940294	1704.66	19.18	6.35674	46.5754	238.195	91.852	0.486384	2.52883
Session 7	193 nm	MC-408-611,4-29	MC-408_611,4	McArthur River	Eearly hydrothermal muscovites	Preserved	239.742	18.5316	6.4471	0.460596	0.881694	1757.3	30.2	10.8611	36.3149	181.61	70.0321	0.292114	1.88329
Session 8	193 nm	MC-408-01-670,3_2	MC-408-01_670,3	McArthur River	Eearly hydrothermal muscovites	Preserved	244.921	12.0641	6.66487	0.233759	0.887663	1733.98	17.9	5.6162	52.7492	272.934	105.248	0.429722	2.86404
Session 8	193 nm	MC-408-01-670,3_3	MC-408-01_670,3	McArthur River	Eearly hydrothermal muscovites	Altered	224.067	11.3275	5.98864	0.213173	0.825699	1688.08	21.29	5.591	47.1845	248.575	95.8547	0.427794	2.56191
Session 8	193 nm	MC-408-01-670,3_4	MC-408-01_670,3	McArthur River	Eearly hydrothermal muscovites	Altered	212.459	10.9449	5.77317	0.2942	0.856242	1706.06	22.26	4.89109	39.7926	206.191	79.5107	0.374241	2.16056
Session 8	193 nm	MC-408-01-670,3_5	MC-408-01_670,3	McArthur River	Eearly hydrothermal muscovites	Altered	175.525	10.1176	4.86948	0.227192	0.854244	1701.66	22.1	4.95442	33.9983	172.552	66.5391	0.379086	1.84595
Session 8	193 nm	MC-408-01-670,3_7	MC-408-01_670,3	McArthur River	Eearly hydrothermal muscovites	Altered	140.212	8.31647	4.08923	0.224774	0.850118	1730.69	24.88	5.60912	32.3234	156.051	60.1761	0.42918	1.75502
Session 8	193 nm	MC-408-01-670,3_8	MC-408-01_670,3	McArthur River	Eearly hydrothermal muscovites	Altered	210.312	14.7595	5.74841	0.353501	0.857732	1714.02	27.95	5.14172	41.6523	214.567	82.7406	0.393418	2.26153
Session 8	193 nm	MC-408-01-670,3_11	MC-408-01_670,3	McArthur River	Eearly hydrothermal muscovites	Altered	158.032	9.05548	4.46651	0.219204	0.84634	1708.45	22.94	5.30952	33.42	166.49	64.2015	0.406257	1.81455
Session 8	193 nm	MC-408-01-670,3_12	MC-408-01_670,3	McArthur River	Eearly hydrothermal muscovites	Altered	214.783	14.4923	5.75844	0.335125	0.916201	1685.58	20.2	4.84842	39.3448	206.628	79.6794	0.370976	2.13624
Session 8	193 nm	MC-408-01-670,3_13	MC-408-01_670,3	McArthur River	Eearly hydrothermal muscovites	Altered	223.615	11.0683	5.94181	0.239907	0.850845	1678.02	19.39	4.95565	41.4955	219.882	84.7904	0.379181	2.25302
Session 8	193 nm	MC-408-01-670,3_14	MC-408-01_670,3	McArthur River	Eearly hydrothermal muscovites	Altered	239.404	12.7402	6.41482	0.24464	0.897878	1703.87	18.19	5.50934	49.8042	261.709	100.92	0.421546	2.70414
Session 8	193 nm	MC-408-01-670,3_16	MC-408-01_670,3	McArthur River	Eearly hydrothermal muscovites	Preserved	118.397	6.27719	3.60517	0.145204	0.790777	1754.68	23.53	9.20944	46.7887	216.352	83.4292	0.704658	2.54041
Session 8	193 nm	MC-408-01-670,3_17	MC-408-01_670,3	McArthur River	Eearly hydrothermal muscovites	Altered	20.0938	0.962058	1.18622	0.0446512	0.757038	1785.73	22.81	78.617	131.421	313.45	120.872	6.01537	7.13556
Session 8	193 nm	MC-408-01-670,3_18	MC-408-01_670,3	McArthur River	Eearly hydrothermal muscovites	Preserved	336.283	22.9397	8.91867	0.567628	0.955036	1736.54	16.32	4.03428	50.7046	269.191	103.805	0.308682	2.75303
Session 8	193 nm	MC-408-01-670,3_19	MC-408-01_670,3	McArthur River	Eearly hydrothermal muscovites	Preserved	410.127	23.7817	10.72	0.597999	0.932658	1734.58	17.37	3.78865	57.2347	308.313	118.891	0.289888	3.10758
Session 8	193 nm	MC-408-01-670,3_20	MC-408-01_670,3	McArthur River	Eearly hydrothermal muscovites	Altered	376.586	20.4521	9.80204	0.442655	0.881922	1718.11	20.29	3.76841	52.0543	281.586	108.584	0.288339	2.82631
Session 8	193 nm	MC-408-01-670,3_21	MC-408-01_670,3	McArthur River	Eearly hydrothermal muscovites	Preserved	349.908	21.273	9.22082	0.472021	0.915235	1730.52	19.45	4.27542	55.5558	296.839	114.466	0.327132	3.01643
Session 8	193 nm	MC-408-01-670,3_22	MC-408-01_670,3	McArthur River	Eearly hydrothermal muscovites	Preserved	352.955	18.8733	9.45631	0.45207	0.87955	1760.11	20.86	4.453	59.3411	311.861	120.259	0.34072	3.22195
Session 8	193 nm	MC-408-01-670,3_23	MC-408-01_670,3	McArthur River	Eearly hydrothermal muscovites	Preserved	356.552	21.0842	9.53461	0.528865	0.901417	1758.06	21.3	4.64484	62.4101	328.611	126.718	0.355399	3.38859
Session 8	193 nm	MC-408-01-670,3_25	MC-408-01_670,3	McArthur River	Eearly hydrothermal muscovites	Preserved	340.381	21.6379	9.02644	0.608933	0.942578	1737.9	19.75	4.12594	52.4833	278.662	107.457	0.315695	2.84961
Session 8	193 nm	MC-408-01-670,3_26	MC-408-01_670,3	McArthur River	Eearly hydrothermal muscovites	Altered	90.0605	21.4681	2.87938	0.535512	0.978761	1741.24	32.82	6.03723	24.4973	107.885	41.6023	0.461937	1.33009
Session 8	193 nm	MC-408-01-670,3_28	MC-408-01_670,3	McArthur River	Eearly hydrothermal muscovites	Altered	412.013	29.9765	10.0619	0.642602	0.850492	1622.38	29.19	3.41679	48.4485	279.33	107.714	0.261435	2.63053
Session 8	193 nm	MC-408-01-670,3_29	MC-408-01_670,3	McArthur River	Eearly hydrothermal muscovites	Altered	154.531	9.79249	4.45405	0.271274	0.891197	1736.22	23.7	4.1187	25.8522	126.289	48.6991	0.315142	1.40366
Session 8	193 nm	MC-408-01-670,3_30	MC-408-01_670,3	McArthur River	Eearly hydrothermal muscovites	Preserved	369.725	21.7216	9.65923	0.465135	0.789642	1722.32	28.9	4.13603	56.2999	303.425	117.006	0.316467	3.05683
Session 8	193 nm	MC-408-01-670,3_31	MC-408-01_670,3	McArthur River	Eearly hydrothermal muscovites	Preserved	210.984	12.5469	5.98503	0.319041	0.890382	1778.73	21.82	4.12008	34.7499	172.482	66.5121	0.315247	1.88676
Session 8	193 nm	MC-408-01-670,3_32	MC-408-01_670,3	McArthur River	Eearly hydrothermal muscovites	Preserved	307.212	21.2529	8.29634	0.422342	0.824935	1755.71	31.21	4.52439	52.8966	275.795	106.351	0.346182	2.87205

## Sheet: Standards
Session	LA	Spot	87Rb/86Sr	2σ	87Sr/86Sr	2σ	rho
Session 1	193 nm	610a-1	2.24960077974525	0.0532762825351014	0.709831141417833	0.00897691570890166	0.31170760125825
Session 1	193 nm	610a-2	2.32145225819513	0.0563167859827505	0.713784473792931	0.00850725184790963	0.291215405711686
Session 1	193 nm	610-1	2.28641096931228	0.0621325779069226	0.709372866916891	0.00857598717269164	0.2705634680295
Session 1	193 nm	610-2	2.31086942323201	0.0618416172941981	0.707629327362863	0.00857029835723755	0.229963758264207
Session 1	193 nm	610-3	2.31984058430819	0.0506142425819191	0.709401812596735	0.00846091747778125	-0.0702719734953436
Session 1	193 nm	610-4	2.35156515560029	0.0515301577137828	0.711195845479402	0.00781100711625118	0.182087815922469
Session 1	193 nm	610-5	2.34865204759655	0.0558642086860015	0.708645450123175	0.00835266939547582	0.370061528416153
Session 1	193 nm	610-6	2.3270555371048	0.0521299106788711	0.709227383135711	0.00805517398198192	0.244393166644385
Session 1	193 nm	610-7	2.30743996406162	0.0480478134942713	0.706271744456428	0.0084064308383594	0.192807613477326
Session 1	193 nm	610-8	2.31911705699596	0.0502184727457862	0.704426358763003	0.00786312783284494	0.28033445167872
Session 1	193 nm	610-9	2.30656967628583	0.0575580529116158	0.714478635316358	0.00883323429126496	0.280677091418813
Session 1	193 nm	610-10	2.30280903337533	0.0532297736872268	0.706042491538084	0.00841754760941942	0.29023489599734
Session 1	193 nm	610-11	2.24367860484858	0.0770694936683496	0.707086775632822	0.0160733953790534	0.282170071743104
Session 1	193 nm	610-12	2.33778586945398	0.0562303244573365	0.706641178166346	0.00882502071993401	0.247987610360319
Session 1	193 nm	610-13	2.30083728597125	0.0559990805570718	0.703256214483473	0.00837434672972696	0.367572758100568
Session 1	193 nm	610-14	2.31267607494969	0.0512766314210754	0.709766733188766	0.00823763514955477	0.340224921478984
Session 1	193 nm	610-15	2.23688175803041	0.103005588874903	0.726595911226961	0.0134907210517383	-0.115043112411629
Session 1	193 nm	610-16	2.27766995573387	0.0707858552768236	0.710909239489932	0.0128088092845805	0.47905106913653
Session 1	193 nm	610-17	2.32094466166703	0.0599333940338237	0.712154991907723	0.0102721367581955	0.260486305389516
Session 1	193 nm	610-18	2.33695615436481	0.0524971042127471	0.707261425004562	0.00881058677749406	0.413123650166873
Session 1	193 nm	MicaMg-1	160.837891055054	4.30431851191237	1.79717714374968	0.0432564624931091	0.480688746887423
Session 1	193 nm	MicaMg-2	155.266808958504	8.1342521426581	1.77903677496568	0.0809529893777303	0.832322355952098
Session 1	193 nm	MicaMg-3	158.852752307677	4.24064395483773	1.8650878388961	0.0435312879680589	0.355286666291359
Session 1	193 nm	MicaMg-4	158.744026257932	4.43834313230426	1.87280098408688	0.0384355909342278	0.361236915070866
Session 1	193 nm	MicaMg-5	154.906916695639	5.07991595820322	1.88999034760932	0.0423357341025394	0.49342714568876
Session 1	193 nm	MicaMg-6	151.255829277858	5.81983411965567	1.80505460342942	0.0558738239970757	0.75952028088186
Session 1	193 nm	MicaMg-7	155.853212589732	4.46253653256221	1.89484024772749	0.0396141332821056	0.272123156154977
Session 1	193 nm	MicaMg-8	155.786185455357	4.11154188427339	1.86022083320931	0.039661257674147	0.560087556121387
Session 1	193 nm	MicaMg-9	157.405336176972	4.14979927961295	1.85995787671252	0.0429637563146427	0.416641799580107
Session 1	193 nm	MicaMg-10	157.04671301641	4.13984316770336	1.8493762743867	0.0437957228348975	0.441847236159915
Session 1	193 nm	MicaMg-11	155.175975017206	4.27846506725345	1.85697857977742	0.0381043816684916	0.454736096572577
Session 1	193 nm	MicaMg-12	158.52134966099	4.75296349731783	1.86163578391735	0.0423437499000968	0.745117576076869
Session 1	193 nm	MicaMg-13	155.80665694652	4.29500555716767	1.87148439375357	0.0315729594732691	0.302148847978243
Session 1	193 nm	MicaMg-14	150.995339626699	7.10020706128236	1.802561082741	0.0632581878548141	0.74977446682125
Session 1	193 nm	MicaMg-15	153.024706819099	3.5860027566926	1.85829793571156	0.0341777914788048	0.515546455899643
Session 1	193 nm	MicaMg-16	156.508504302708	5.31423202102468	1.84802379439821	0.0432820373622976	0.533307522079501
Session 1	193 nm	MicaMg-17	155.082068851398	4.48789002422021	1.87026496368594	0.0362129254809397	0.487508585369447
Session 1	193 nm	MicaMg-18	149.729726984243	6.97477574702873	1.81402130224038	0.0621476884963198	0.82328892410569
Session 1	193 nm	610-1	1.1353839918983	0.0189780455773184	0.706547737382395	0.0081245745654536	0.312313128054117
Session 1	193 nm	610-2	1.13931888434913	0.0202462477242777	0.707414587878257	0.00746102090903973	0.494139872375415
Session 1	193 nm	610-3	1.137643606705	0.0195674405168634	0.706855181126159	0.00859871790784657	0.474783749260983
Session 1	193 nm	610-4	1.15693547596882	0.0192371893274845	0.710631790329107	0.00839061113723178	0.288689435521374
Session 1	193 nm	610-5	1.13980255891062	0.0227532903197766	0.714530273606031	0.0097398634582727	0.228177660848102
Session 1	193 nm	610-6	1.15514040134017	0.0243046552176215	0.708481233812883	0.00644267058331067	0.303077811847869
Session 1	193 nm	610-7	1.12415587875975	0.0203826980517041	0.707254225855914	0.00887244226886095	0.432221462945773
Session 1	193 nm	610-8	1.14093417145465	0.0237957910084959	0.707124655135696	0.00874599752656226	0.393015078587028
Session 1	193 nm	610-9	1.14190256687116	0.0326399493961456	0.712286925969253	0.0079861374435443	0.20391320164656
Session 1	193 nm	610-10	1.13733520440985	0.0349493831411804	0.713873581118494	0.0102960312328944	0.396578315486917
Session 1	193 nm	610-11	1.14554069979295	0.0277865413625828	0.713885255108041	0.0098237933521158	0.291313723497847
Session 1	193 nm	610-12	1.1343554333329	0.0315167893967254	0.715277878288224	0.0102644550281032	0.142466143611263
Session 1	193 nm	610-13	1.13747215274194	0.0261177137820916	0.707326544283564	0.00959896442331852	0.228365262755674
Session 1	193 nm	610-14	1.14283521182636	0.0267698336895064	0.703686571478388	0.00863520628973461	0.333233183375289
Session 1	193 nm	610-15	1.14799190765298	0.0250282837267813	0.712728185099929	0.00905289774985866	0.0815755736013046
Session 1	193 nm	610-16	1.12523080472935	0.0241963352333206	0.706045916013055	0.00839095640649907	0.336423300940576
Session 1	193 nm	610-17	1.13751768545186	0.0240375334153428	0.707939248834878	0.00823701807666847	0.178236363674099
Session 1	193 nm	610-18	1.13178259607426	0.0177957404841044	0.712692208679731	0.00775252463836111	0.121486030908516
Session 1	193 nm	MicaMg-3	156.529703294955	3.6205240529944	1.84694571271661	0.0329489880005655	0.594824425333955
Session 1	193 nm	MicaMg-4	157.084008492987	4.03591311658363	1.89117881907178	0.0366289347265045	0.581994461383904
Session 1	193 nm	MicaMg-5	155.536066900694	3.66005045096196	1.87943507032858	0.0349082306698304	0.500636898758452
Session 1	193 nm	MicaMg-6	156.088448423923	3.26932784397224	1.86249360778935	0.0333119010073096	0.585078046882122
Session 1	193 nm	MicaMg-7	154.603256688825	3.02343587951147	1.8810163865836	0.0346791299213945	0.482203255549262
Session 1	193 nm	MicaMg-8	156.023124724922	3.26109274287617	1.8377866330585	0.0348191233017334	0.312888686350061
Session 1	193 nm	MicaMg-10	158.219717741973	2.53004191431487	1.87694125690552	0.0302962731600797	0.320845857753064
Session 1	193 nm	MicaMg-11	152.992451187577	3.58905878306429	1.86917099113746	0.0304226600065612	0.462481818244849
Session 1	193 nm	MicaMg-12	157.686031225261	3.70236289605659	1.88221560147711	0.0376600601303906	0.640889067497131
Session 1	193 nm	MicaMg-13	155.93847981348	3.81283318592967	1.87045820787892	0.0318412188845749	0.582432494146286
Session 1	193 nm	MicaMg-14	156.387697404878	3.58976591706831	1.87956221454403	0.0347304670679298	0.48338856559997
Session 1	193 nm	MicaMg-15	156.105095578168	3.69645114830433	1.87315849427852	0.0323240273970897	0.427625989403569
Session 1	193 nm	MicaMg-16	155.962599678078	3.73535181764206	1.87958187272618	0.0291934024284123	0.367582968481263
Session 1	193 nm	MicaMg-17	154.971656208646	3.83150183291588	1.86821818946434	0.0309465684540516	0.513794050982494
Session 1	193 nm	MicaMg-18	150.383454211611	5.85303309219569	1.78656978971404	0.0592361029644909	0.913001461240616
Session 1	193 nm	610-1	2.27055952312552	0.0630136227633441	0.714858409401538	0.00663545037006325	0.191810531844126
Session 1	193 nm	610-2	2.26455198920477	0.070181410558463	0.709474615150914	0.00808396305931265	0.242095945518655
Session 1	193 nm	610-3	2.26179304937098	0.0552462954210923	0.715606470807369	0.00688071594420364	0.171678463939126
Session 1	193 nm	610-4	2.2494543713548	0.0638364635611446	0.713185007587404	0.00798802164171661	0.345258886627331
Session 1	193 nm	610-5	2.25145668981325	0.0423557358154256	0.708010165036753	0.00652539063088862	0.433346988447161
Session 1	193 nm	610-6	2.24638486533363	0.0482024628859969	0.710336862158968	0.00618945735426549	0.309736176029134
Session 1	193 nm	610-7	2.27699249256167	0.0446293938347491	0.704821184475704	0.00564160311372088	0.337778492193106
Session 1	193 nm	610-8	2.26481986821364	0.0612286706299125	0.70417184377374	0.00746692892868768	0.405047393958058
Session 1	193 nm	610-9	2.25814956947443	0.0618042091360072	0.711994778386041	0.00777988907530453	0.46642897789575
Session 1	193 nm	610-10	2.26688124808736	0.0751169718391842	0.705636111654686	0.00913636519056082	0.280482120900499
Session 1	193 nm	610-11	2.25894432910536	0.0712155342110258	0.711325912623158	0.00862617094020672	0.442006602683267
Session 1	193 nm	610-12	2.27255413802174	0.0567224583395112	0.710895729010741	0.00770043041108082	0.216456514391865
Session 1	193 nm	610-13	2.25632475103245	0.0675732598317354	0.709968236203493	0.00895949061057779	0.471418362077509
Session 1	193 nm	610-14	2.26864498003636	0.0740915135338447	0.708893083976629	0.00831891777780064	0.447811108681553
Session 1	193 nm	610-15	2.25540080518763	0.0709644789033083	0.709003989563127	0.00714535767228558	0.444918567807941
Session 1	193 nm	610-16	2.23965134171862	0.0710937756105431	0.705770618092134	0.00791406372848541	0.368058217538437
Session 1	193 nm	610-17	2.26679322955406	0.0452848820586998	0.70965746507526	0.00545051771286814	0.3059559548818
Session 1	193 nm	610-18	2.26702190265783	0.0566822523688848	0.710971517022339	0.00678395751476871	0.251680732433888
Session 1	193 nm	MicaMg-1	159.703825597844	4.23256839981125	1.86372781380805	0.043889693008582	0.734894452721237
Session 1	193 nm	MicaMg-2	162.598945832186	2.81849978611209	1.86225547752428	0.0380145236288514	0.502917842314086
Session 1	193 nm	MicaMg-3	153.452315532863	4.34018601891592	1.85346005089392	0.0320806550605951	0.467021170163077
Session 1	193 nm	MicaMg-4	154.68548023101	4.51635853464243	1.85387321434205	0.0310696453399992	0.545546775484854
Session 1	193 nm	MicaMg-5	152.821433597992	4.08105017747154	1.85959730092794	0.0318660754746702	0.272310895174616
Session 1	193 nm	MicaMg-6	155.834453831088	4.09922735271543	1.83817837026352	0.0289078953240963	0.562854065643543
Session 1	193 nm	MicaMg-7	155.782641339478	5.66960132218367	1.84997722511333	0.0415008918873567	0.679078851261742
Session 1	193 nm	MicaMg-8	156.973381762359	4.75827070988304	1.86581024250662	0.0375343482260353	0.304030347342458
Session 1	193 nm	MicaMg-10	155.400935506864	4.39779255580995	1.83127076000666	0.025816458965523	0.516749405543808
Session 1	193 nm	MicaMg-11	153.995378765221	4.42390052801185	1.84602538382006	0.0355633387989851	0.251439337364825
Session 1	193 nm	MicaMg-12	156.262687706677	5.40848380384316	1.8673467080104	0.0363938690156235	0.376187510000517
Session 1	193 nm	MicaMg-13	153.712837173388	3.95441164634708	1.86709460288835	0.0276575504436742	0.283124012035893
Session 1	193 nm	MicaMg-14	155.062316908955	5.10234595790554	1.86393007540023	0.0323567991336633	0.215767955494847
Session 1	193 nm	MicaMg-15	155.746700423305	4.39170877328473	1.8534498176427	0.0388448636838527	0.415875086009141
Session 1	193 nm	MicaMg-16	154.932296658532	5.36050121803885	1.85600016638634	0.0325183330717381	0.451922855869928
Session 1	193 nm	MicaMg-17	154.093041440741	3.96506800556535	1.86238266322071	0.0296836979562482	0.279188357708439
Session 1	193 nm	MicaMg-18	157.109333979577	4.78945510358302	1.8505259169722	0.031456385335993	0.400455123018256
Session 1	193 nm	610-1	2.36228022519331	0.0851997861490616	0.712299090417983	0.0118438704631739	0.762341307926586
Session 1	193 nm	610-2	2.35773057931899	0.103436570070781	0.710627579368942	0.0163797298152944	0.811221633869862
Session 1	193 nm	610-3	2.35429504586564	0.0897855071355286	0.711264134886116	0.0136289484451032	0.764894514230108
Session 1	193 nm	610-4	2.33151939379104	0.0739523278049598	0.71038093721446	0.0100146175481689	0.727806763155017
Session 1	193 nm	610-5	2.31453332412941	0.0849340315529686	0.70800616192742	0.0114498257156043	0.756150718989371
Session 1	193 nm	610-6	2.31956516039036	0.0905761552763285	0.709350299918948	0.0132307961301774	0.834941884338896
Session 1	193 nm	610-7	2.33899098540873	0.0865455128990457	0.712316257741931	0.0128036262354718	0.832445279493176
Session 1	193 nm	610-8	2.32031024527194	0.0909233841602272	0.706353837058901	0.0133420639255693	0.91652991230991
Session 1	193 nm	610-9	2.33905473561573	0.0830804188025914	0.709373925300188	0.0115673124788233	0.804157655759531
Session 1	193 nm	610-10	2.30377827643178	0.0812490868757724	0.70701777616511	0.0116127388910562	0.85142829242328
Session 1	193 nm	MicaMg-1	156.202299925284	7.04601130153053	1.84105192547553	0.0381815152068453	0.624336721841193
Session 1	193 nm	MicaMg-2	150.855365440263	10.0652980635739	1.77779499079243	0.069933372466861	0.837608558979515
Session 1	193 nm	MicaMg-3	159.551695805176	5.52341574913557	1.87239361664739	0.0393219428461935	0.465542684539151
Session 1	193 nm	MicaMg-4	154.918954700464	8.11010144796055	1.83352445181613	0.0678194695286726	0.816393445964105
Session 1	193 nm	MicaMg-5	156.612390992156	6.63013335382074	1.84243098544143	0.0571119635805632	0.681090276443464
Session 1	193 nm	MicaMg-6	159.105502975677	5.98222268477842	1.88040971566672	0.0436215531215361	0.593556340823692
Session 1	193 nm	MicaMg-7	152.680424114337	7.59266995134803	1.86191203548133	0.0543138773931099	0.576817093108942
Session 1	193 nm	MicaMg-8	154.717137419135	7.17703578830122	1.84437029823783	0.0658241875746327	0.710949523227063
Session 1	193 nm	MicaMg-9	154.044161398851	6.0661790141513	1.8569911459985	0.0466765512516001	0.523077982951961
Session 1	193 nm	MicaMg-10	157.312067228655	7.31631758501419	1.87274244120916	0.0450027795846692	0.623428593504899
Session 1	193 nm	610-1	2.4193820128176	0.0548876499364863	0.709690940866009	0.00559317776513211	0.404491495453296
Session 1	193 nm	610-2	2.42433842085182	0.0563658019866298	0.703765508276966	0.0105856034619257	-0.26111795539378
Session 1	193 nm	610-3	2.37846189555183	0.0462643880354423	0.7094183341404	0.00435308940404394	0.107227906466956
Session 1	193 nm	610-4	2.37575331640149	0.0521743331707629	0.707753874208227	0.00505259250964588	0.346085015481692
Session 1	193 nm	610-5	2.39172520827631	0.0509493173459389	0.708281556264565	0.00435653722631878	0.280156152386718
Session 1	193 nm	610-6	2.39412187334722	0.0540720309959916	0.703745131807297	0.0105833527771265	-0.160893542318847
Session 1	193 nm	610-7	2.39441507534511	0.0437017448583315	0.702796407720317	0.0103907771946247	-0.202994621956154
Session 1	193 nm	610-8	2.37550849812989	0.0319133053749957	0.713786071772822	0.00509918633402715	0.235062745292051
Session 1	193 nm	610-9	2.37395936064065	0.044713405987022	0.717074485687516	0.00517592533040898	0.307373272921409
Session 1	193 nm	610-10	2.36955046187541	0.0457524863298435	0.708690666463505	0.00554678722309999	0.383571551374302
Session 1	193 nm	610-11	2.36498727018418	0.0468157525232546	0.712527284925016	0.00455750495459549	0.307918254742253
Session 1	193 nm	610-12	2.37155648607507	0.0467244343094644	0.71297135167194	0.00445284349116142	0.28706911320522
Session 1	193 nm	610-13	2.37532873202546	0.0511868033983939	0.705553973985473	0.0127545070971018	-0.438904575733709
Session 1	193 nm	610-14	2.37893984754214	0.0333588789033029	0.714780090911336	0.00477928718840496	0.0325233211588112
Session 1	193 nm	610-15	2.34561518856008	0.0480153581655811	0.711126142878772	0.00546570396126897	0.408439587301754
Session 1	193 nm	610-16	2.35793232658808	0.0422490839721754	0.711013193361616	0.00512413437244856	0.419147736277727
Session 1	193 nm	610-17	2.35428808263204	0.0313527713610004	0.71332072030464	0.00493285116131901	0.193573186076082
Session 1	193 nm	610-18	2.33984778400783	0.0360207439348464	0.708286264753583	0.0041677527925816	0.23482853466383
Session 1	193 nm	MicaMg-1	154.840499806676	3.86324576287221	1.87889513177382	0.0304569447907722	0.331739085271602
Session 1	193 nm	MicaMg-3	158.578215932713	3.80674667543227	1.85425470721954	0.042587882813622	0.560296923181789
Session 1	193 nm	MicaMg-4	155.891065162642	4.68010470029954	1.83493319742528	0.0519995214315507	0.568861237925237
Session 1	193 nm	MicaMg-5	154.595736319396	3.67868244033399	1.84796472638979	0.0411006122439918	0.277118905076819
Session 1	193 nm	MicaMg-6	156.369625072427	3.57880924986892	1.84622090190357	0.0326239381878178	0.534813375789747
Session 1	193 nm	MicaMg-7	154.307946276025	4.6663112229127	1.81829881246144	0.0324510737052175	0.544740221895063
Session 1	193 nm	MicaMg-8	150.692631897945	6.17762787083924	1.80166322412418	0.0601938909642074	0.644671583979488
Session 1	193 nm	MicaMg-10	156.018556386045	4.51717292964227	1.86191053375269	0.0345292096170494	0.442856202348524
Session 1	193 nm	MicaMg-11	157.499977015434	3.90632771726246	1.86869571581387	0.0284532617873487	0.257126958560729
Session 1	193 nm	MicaMg-12	154.812260985363	4.28733677006356	1.85368954296895	0.0305002764635888	0.239666799219582
Session 1	193 nm	MicaMg-13	152.531778090755	3.21896759869337	1.86893414479868	0.0354177354990879	0.243713457324441
Session 1	193 nm	MicaMg-14	157.192267252806	4.56663963059886	1.86237296420866	0.0541725183607459	0.38243818487338
Session 1	193 nm	MicaMg-15	155.95029819812	3.51636352561852	1.88898949281493	0.0387949423568253	0.347471232921162
Session 1	193 nm	MicaMg-16	151.339439107161	4.7807170176222	1.84519708699614	0.0402954444271639	0.443667173310481
Session 1	193 nm	MicaMg-17	157.714866971636	4.93487142039307	1.86206800409904	0.0354857181287725	0.419222532573555
Session 1	193 nm	MicaMg-18	159.09686715008	5.12578231625162	1.85287154534829	0.0326854239208242	0.395124525396951
Session 2	193 nm	610-1	2.23258011745317	0.0154091094988684	0.709020361999009	0.0028861609713018	0.182723337128244
Session 2	193 nm	610-2	2.25106153940302	0.0228332016098132	0.710895877653625	0.00310823091130789	0.249469703907246
Session 2	193 nm	610-3	2.23822395435326	0.0151203004070226	0.711083266122272	0.00269131741040268	0.0999219684581698
Session 2	193 nm	610-4	2.25105242323029	0.0145734147492005	0.708079463272591	0.00281162088951566	0.32008622157408
Session 2	193 nm	610-5	2.2515925082111	0.0149126092243967	0.710485591301746	0.00330485384818494	0.0374782879530691
Session 2	193 nm	610-6	2.24051425517564	0.019335045044	0.708900895304098	0.00341114454391431	0.428371505706823
Session 2	193 nm	610-7	2.25845665388652	0.0128517021305944	0.708768153772875	0.00286334786845943	0.0408551396757073
Session 2	193 nm	610-8	2.23917337579487	0.0165616605106422	0.709505457568425	0.00263260883469374	0.124019129948597
Session 2	193 nm	610-9	2.25673697441374	0.0158887617473431	0.711712617860336	0.00295429940778023	0.28374683208003
Session 2	193 nm	610-10	2.26385726863188	0.0148806900948722	0.709163935451102	0.00302906887289066	0.24140967742757
Session 2	193 nm	610-11	2.26120188189615	0.0156222458130946	0.707555651411147	0.00364132422844915	0.348092025905833
Session 2	193 nm	610-12	2.2709418378119	0.0175366829090948	0.710422174011596	0.00318117338938107	0.278296141653929
Session 2	193 nm	610-13	2.28298373055539	0.0159418940373785	0.710557932562741	0.00350500396968943	0.274846620282712
Session 2	193 nm	610-14	2.26070236602023	0.0179041605516366	0.709313889978463	0.0034507623438559	0.315911512861806
Session 2	193 nm	610-15	2.30310373829741	0.0196272392328741	0.71024511973655	0.0043937005498429	0.245732551513324
Session 2	193 nm	610-16	2.28900854920509	0.0187837137134636	0.709473566759194	0.00366284248592658	0.472528536779152
Session 2	193 nm	MicaMg-1	154.805620312368	2.43832993721824	1.85506153229732	0.0225919741558756	0.436049333341946
Session 2	193 nm	MicaMg-2	156.349860357873	2.67306246300747	1.85057324670013	0.0190424261877558	0.453319141013765
Session 2	193 nm	MicaMg-3	155.894280411119	2.0990385880039	1.84917779087036	0.0243394478989142	0.317666178878813
Session 2	193 nm	MicaMg-4	154.889456225906	2.85189588290674	1.8562365372414	0.0184142901278487	0.427176855762869
Session 2	193 nm	MicaMg-5	154.98036587829	2.59954594789099	1.85736970792617	0.0231347059513122	0.533843002207743
Session 2	193 nm	MicaMg-6	156.483951500736	2.66657307119927	1.84565710395232	0.0222849728220899	0.0874309051847278
Session 2	193 nm	MicaMg-7	154.010268026046	2.93279112887972	1.86019005048921	0.0295284246117903	0.333987774869074
Session 2	193 nm	MicaMg-8	157.303531415616	3.38246302941774	1.86880187124619	0.0375996400825427	0.263091255605341
Session 2	193 nm	MicaMg-9	157.713947502119	2.7766424436059	1.8760308187851	0.0158406597178059	0.21726476393249
Session 2	193 nm	MicaMg-10	154.365253912724	2.78366401265414	1.86012750861521	0.0237299132066417	0.514011503754703
Session 2	193 nm	MicaMg-11	157.208084317098	3.20367235945909	1.85842456666369	0.0222174806715556	0.308848358393824
Session 2	193 nm	MicaMg-12	153.683996706697	3.1384250941388	1.83125195398039	0.0279160943563085	0.598258690753866
Session 2	193 nm	MicaMg-13	154.42182104248	2.88087190362383	1.85293784598148	0.0272463849372239	0.464623874089102
Session 2	193 nm	MicaMg-14	155.866619064098	2.72605706996404	1.85409416103076	0.0195994577824054	0.360585786051765
Session 2	193 nm	MicaMg-15	154.870866382752	2.3500797225217	1.85736289801022	0.0178674603899715	-0.015824950744428
Session 2	193 nm	MicaMg-16	156.751726709762	2.96710406302829	1.87739261753947	0.0199685404867214	0.63212175505136
Session 2	193 nm	610-2	2.2718442078303	0.0517917340232714	0.708610004202131	0.00472975754692592	0.40932971296991
Session 2	193 nm	610-3	2.27774751273784	0.051689791926433	0.712426719175901	0.00412776536839078	0.433797800658427
Session 2	193 nm	610-4	2.2649152050672	0.0519698609766745	0.708636016082432	0.00433097414416432	0.199977908192324
Session 2	193 nm	610-5	2.26079383686994	0.050664542207289	0.71082035028561	0.003011272071191	0.214173790672794
Session 2	193 nm	610-6	2.28501008766481	0.0514584883038235	0.707508720946576	0.00294055915653806	0.216993158770557
Session 2	193 nm	610-7	2.28074989508151	0.0516932061936851	0.71199999337989	0.003321747221045	0.402825388777904
Session 2	193 nm	610-8	2.27094832102091	0.0514089673382728	0.708699572023993	0.00340673980507026	0.0673758544789954
Session 2	193 nm	610-9	2.28495836735749	0.0513364223304322	0.708311341206546	0.00336770340656179	0.208045224372106
Session 2	193 nm	610-10	2.29442844323218	0.0523678386480004	0.710237304003268	0.00344378278750038	0.295434203562553
Session 2	193 nm	610-11	2.29013076405735	0.0514277753357983	0.710182815443705	0.00327060864616981	0.146571918112559
Session 2	193 nm	610-12	2.27739697054519	0.0530214997328006	0.708650183378536	0.00313547939455639	0.152294995100573
Session 2	193 nm	610-13	2.27718392412651	0.0521988435556984	0.709012426152342	0.00294574256342875	0.264361568918911
Session 2	193 nm	610-14	2.28121549149732	0.0521972293661064	0.710991553719069	0.00392058223709352	0.265647879096845
Session 2	193 nm	MicaMg-2	156.736701388854	4.24395651600917	1.85497770083142	0.0246428263483064	0.3547436267606
Session 2	193 nm	MicaMg-3	154.116950110337	4.01616386292713	1.84582323650326	0.0244754659219012	0.232659086857875
Session 2	193 nm	MicaMg-4	156.869207059363	4.39515088457306	1.86725302452653	0.0260532605454346	0.578646019328858
Session 2	193 nm	MicaMg-5	154.434418822761	3.97823999750745	1.87002890794579	0.0207152513587089	0.214483873953593
Session 2	193 nm	MicaMg-6	153.893250543189	3.95445910063605	1.86173301054846	0.0230890375314463	0.484540773978597
Session 2	193 nm	MicaMg-7	155.067282765063	4.18359539240584	1.8442398894344	0.0273894503654914	0.202998778545236
Session 2	193 nm	MicaMg-8	155.053510303245	4.46246246085229	1.86897822184569	0.0243895198081805	0.0753675944828986
Session 2	193 nm	MicaMg-9	157.731910550255	3.93249533692816	1.85583559214217	0.0179046911904953	0.479363283447695
Session 2	193 nm	MicaMg-10	152.070282921378	4.47405170191355	1.86673988991701	0.0247069530604355	0.420225550485132
Session 2	193 nm	MicaMg-11	151.750478518027	4.52854228803367	1.84299782206205	0.0236354727035015	0.380056190275679
Session 2	193 nm	MicaMg-12	155.405550114358	4.29357324014818	1.85883236181376	0.0234942351105423	0.586347497319269
Session 2	193 nm	MicaMg-13	157.467193230513	4.19358562839008	1.86180546129757	0.0179219546695241	0.111380380685016
Session 2	193 nm	MicaMg-14	162.203263672657	5.50580300818349	1.86473780622988	0.0201073851063289	0.383501480195501
Session 2	193 nm	610-1	2.22956717124417	0.108947002556518	0.710799114951607	0.00388458179831561	0.0799886070498311
Session 2	193 nm	610-2	2.23508206338422	0.10997810781026	0.712470422717469	0.00442923346515091	0.331406732048952
Session 2	193 nm	610-3	2.22992756168051	0.109858064668321	0.707684901212907	0.00484511971571551	0.168896791416886
Session 2	193 nm	610-4	2.24121204860621	0.110470731814391	0.706409888127984	0.00476811235591626	0.456833500803249
Session 2	193 nm	610-5	2.22858259105088	0.109743647664451	0.711016223845713	0.00393508640316846	0.147003175389994
Session 2	193 nm	610-6	2.23650167966621	0.109944730134345	0.709160056750875	0.00494885820761111	0.260176427439746
Session 2	193 nm	610-7	2.20859719896523	0.108648025395939	0.71207795028881	0.00526860322127657	0.48709983464114
Session 2	193 nm	610-8	2.2212865812193	0.108857378386018	0.710371189447274	0.00399455806441895	0.377183226398413
Session 2	193 nm	610-9	2.21180657744977	0.108928873163044	0.706965407672762	0.00420422162261346	0.357935841899436
Session 2	193 nm	610-10	2.22282008849285	0.108932378775336	0.710069715844833	0.00397981671547457	0.179931729592591
Session 2	193 nm	610-11	2.21582626154596	0.10773523527642	0.710244829617985	0.00364013113376812	0.170255694811994
Session 2	193 nm	610-12	2.20809766339247	0.10753865653039	0.707683045670052	0.00331104099437569	0.0643977701548675
Session 2	193 nm	610-13	2.20731556664566	0.107600886507904	0.708359898778456	0.00392679790465247	0.25425605717422
Session 2	193 nm	610-14	2.21437033336667	0.108288857582697	0.71108983620598	0.00364418440729288	0.28199491216583
Session 2	193 nm	610-15	2.20260392418853	0.107188490664357	0.708303080018349	0.00359783393166503	0.149365183176596
Session 2	193 nm	610-16	2.18839995783098	0.107280643894664	0.711715211384304	0.00391691481251985	0.407640813811133
Session 2	193 nm	610-17	2.19879719616261	0.107452953693722	0.712100186395478	0.00365102219694415	0.314432093790203
Session 2	193 nm	610-18	2.19804641547588	0.107641582038878	0.71105385605925	0.00447796450486187	0.442588008834844
Session 2	193 nm	610-19	2.1968986635879	0.108342827287839	0.707218652736472	0.00509211187812293	0.562896001548936
Session 2	193 nm	610-20	2.18435299226145	0.106810116161274	0.708943412127882	0.004778648597934	0.258100551196706
Session 2	193 nm	610-21	2.22096834162141	0.108976049516523	0.709942120089418	0.00468482875022792	0.290537124875728
Session 2	193 nm	MicaMg-2	152.263925503711	7.69784304771735	1.86888436993528	0.020506187726858	0.434556266610067
Session 2	193 nm	MicaMg-3	158.864466530894	9.57713746091643	1.85049794352537	0.0401026148190512	0.260063089672036
Session 2	193 nm	MicaMg-4	152.566296294285	8.205341567787	1.84424617022234	0.0236782602050639	0.50286738492158
Session 2	193 nm	MicaMg-5	156.787510102306	8.4989332958271	1.86433985147797	0.0222113551649177	-0.0436830906960659
Session 2	193 nm	MicaMg-6	156.663585023341	8.67965580641558	1.87049552201432	0.0186463105169415	-0.074535462873783
Session 2	193 nm	MicaMg-7	153.080442637719	7.72860558703614	1.87446665530307	0.0207064668808024	0.271534994239588
Session 2	193 nm	MicaMg-8	154.913232285531	8.03272902724789	1.84764052737072	0.0207448954362369	0.383522995700943
Session 2	193 nm	MicaMg-9	153.747490854334	7.84743576227639	1.86177385986713	0.0210223340182748	0.270256159504545
Session 2	193 nm	MicaMg-10	160.95447898086	9.33873726084533	1.86327994027106	0.019557916040071	-0.00974955626874922
Session 2	193 nm	MicaMg-12	156.051274164542	8.29963238691927	1.8605793395636	0.0199591952403051	0.179792731325685
Session 2	193 nm	MicaMg-13	155.285482894318	8.02946722514862	1.8688735555362	0.0185953694011648	-0.0255114886175452
Session 2	193 nm	MicaMg-14	155.933408742665	8.05584936898907	1.84847828933202	0.0231462494144075	0.194927079538552
Session 2	193 nm	MicaMg-15	154.803151554705	7.99499999122834	1.87883404062211	0.0183268586646689	0.32538310643024
Session 2	193 nm	MicaMg-16	158.987381020612	8.5383912669926	1.86799097411976	0.0243520887720432	-0.0343291157658107
Session 2	193 nm	MicaMg-17	163.882130457037	9.79669820898454	1.85843450001587	0.0274463114179492	0.207428420972656
Session 2	193 nm	MicaMg-18	152.89189305869	8.33541723083507	1.82943072723208	0.0329217644830719	0.219027175411512
Session 2	193 nm	MicaMg-19	152.078463448114	8.12060789326287	1.8500523618021	0.0224218171809981	0.413882721099107
Session 2	193 nm	MicaMg-20	147.329140043829	7.8069238157091	1.84031836364164	0.0329316022027965	0.569018299684946
Session 2	193 nm	MicaMg-21	159.316212614056	8.25949079973591	1.86075805800074	0.0244734829222817	0.268318069511213
Session 2	193 nm	610-1	2.23117765550117	0.0316635157758726	0.712204072422052	0.00414088363589428	0.12543834417413
Session 2	193 nm	610-2	2.24554719884143	0.0320725818059841	0.709747118330242	0.00420747137291928	0.391221054808975
Session 2	193 nm	610-3	2.21353860361036	0.0326711819466719	0.710481665946113	0.00461287749260909	0.0651419295806235
Session 2	193 nm	610-4	2.2211645603084	0.0309974481518269	0.711046221279584	0.00449307759936932	0.656071367698109
Session 2	193 nm	610-5	2.23951411432371	0.0303679898178265	0.711865883993637	0.00422617724938154	0.377143100118267
Session 2	193 nm	610-6	2.22372119176136	0.0301336332240561	0.709056399019329	0.00433106226163833	0.507673563562916
Session 2	193 nm	610-7	2.24877510846388	0.030565705374517	0.710294939520666	0.00453131654600728	0.426345175329662
Session 2	193 nm	610-10	2.26757629922182	0.0296703014892178	0.710035869871407	0.00439802261121544	0.297402742756548
Session 2	193 nm	610-11	2.22902377118093	0.0293120827457025	0.706470209137757	0.00442515547674962	0.388871407335608
Session 2	193 nm	610-12	2.25810910818114	0.0279119218138135	0.714819542789849	0.00447590520534637	0.428709834165191
Session 2	193 nm	610-13	2.23845081981989	0.0273257086471219	0.712056889152464	0.00458838294998294	0.376033543052261
Session 2	193 nm	610-14	2.22317366187117	0.0314742019829881	0.708493385950461	0.00520986074115742	0.411970220441836
Session 2	193 nm	610-15	2.22804934769851	0.0307997997452938	0.707745896184169	0.00437907928011305	0.593361591157694
Session 2	193 nm	610-16	2.22817205054662	0.0293436856648212	0.710545841282047	0.00472089702885562	0.209812020647466
Session 2	193 nm	610-17	2.2386067486056	0.0274945011901563	0.709654409306597	0.00406262446931744	0.258671542644764
Session 2	193 nm	610-18	2.22447967194837	0.0301916543926178	0.706833743844878	0.0043671450813046	0.347351620351913
Session 2	193 nm	610-19	2.233017824708	0.0302770750805806	0.706917651737635	0.00482779650571892	0.339090577928492
Session 2	193 nm	610-20	2.23250379302633	0.0299421981828718	0.709061508055584	0.00492029324444446	0.248690081632896
Session 2	193 nm	610-21	2.23112572401884	0.0282570510240133	0.706949752175527	0.00465293538478488	0.137932051715362
Session 2	193 nm	MicaMg-3	156.971982475781	3.03087714175955	1.83079075151232	0.0225234527494114	0.300604606266643
Session 2	193 nm	MicaMg-4	155.660727322856	3.05977593090754	1.84699565927759	0.0208886203029493	0.397655432003402
Session 2	193 nm	MicaMg-5	153.821410986652	3.06879460171346	1.86859951622339	0.0203886977393244	0.29907113481194
Session 2	193 nm	MicaMg-6	158.300743939487	4.17684393221734	1.85443984974995	0.022172164951405	0.3642094690985
Session 2	193 nm	MicaMg-7	152.476263187162	3.37519508931354	1.86816594352927	0.0230159964381009	0.312686045362795
Session 2	193 nm	MicaMg-8	153.900415895834	3.97301872176906	1.84830826247785	0.0260015962219122	0.498360328892799
Session 2	193 nm	MicaMg-10	155.982194260134	2.48464199283344	1.87766928914999	0.0241547799147578	0.219952993440808
Session 2	193 nm	MicaMg-11	155.029281628029	2.94056523933705	1.86487081366625	0.0225820110482961	0.210446519177114
Session 2	193 nm	MicaMg-12	157.807077114205	4.02635872617321	1.8617938438883	0.0244942198660929	0.243353702726677
Session 2	193 nm	MicaMg-13	155.773015787782	2.64228250501429	1.87159138170654	0.0223209486030025	0.428913607506109
Session 2	193 nm	MicaMg-14	155.263057764232	3.38131264166953	1.86885209053245	0.0263739328014559	0.389439716662421
Session 2	193 nm	MicaMg-15	154.199668363328	3.27920266618362	1.82738888685706	0.0221980353260731	0.323834124306131
Session 2	193 nm	MicaMg-16	155.009503686623	4.36727006532726	1.84792821029473	0.0341615011555134	-0.016061953103128
Session 2	193 nm	MicaMg-17	158.265968850413	3.46670645220237	1.85312018455953	0.0232372628962097	0.305278041565395
Session 2	193 nm	MicaMg-18	154.616649493898	2.90588046429248	1.83808956169207	0.0251325552715181	0.459392534872079
Session 2	193 nm	MicaMg-19	156.449801640103	3.26935446412021	1.86360829134422	0.0237294345335407	0.423150060876435
Session 2	193 nm	MicaMg-21	155.672237603483	3.06288730531376	1.86393185925432	0.0246618169888758	0.16194743171709
Session 2	193 nm	610-1	2.20235277052784	0.0672960943534924	0.711183989923809	0.0032266900799696	0.199550661842299
Session 2	193 nm	610-2	2.21723969765054	0.0682912240919234	0.709855010882997	0.00382229055873821	0.532282965559057
Session 2	193 nm	610-3	2.20914388523189	0.0682011099259868	0.709937734332349	0.00344251914025431	0.337881202156284
Session 2	193 nm	610-4	2.20401617794886	0.0666645192062681	0.709486389601809	0.0028505026854205	0.307567897502471
Session 2	193 nm	610-5	2.20259193492852	0.0669401480524736	0.707354917680115	0.00318078032979957	0.396961098057586
Session 2	193 nm	610-6	2.21307526775467	0.0670429969139146	0.710877036816136	0.00300298980493811	0.237567360265964
Session 2	193 nm	610-7	2.19803945169653	0.0682767520426267	0.708387452916137	0.00377173465216717	0.389376285856419
Session 2	193 nm	610-8	2.21948241929579	0.0672847678777053	0.709605350512547	0.00331327623732731	0.493928890564233
Session 2	193 nm	610-9	2.21166070644138	0.0677493806423333	0.710712084320513	0.00378951921572393	0.527762720146416
Session 2	193 nm	610-10	2.22689595012679	0.0676694108158903	0.712167418262523	0.00366987656671556	0.22522463384385
Session 2	193 nm	610-11	2.21542595507953	0.0669182632396988	0.711195913179218	0.00373865718004391	0.358243722877657
Session 2	193 nm	610-12	2.23092751747142	0.0685683121743426	0.710221621535891	0.00375695565442584	0.531634032761468
Session 2	193 nm	610-13	2.201226854557	0.0673696658028772	0.710702207230331	0.00314374029187605	0.303225080246315
Session 2	193 nm	610-14	2.23832992188087	0.071767531357197	0.707239815468358	0.00642884538657183	0.338230122029546
Session 2	193 nm	610-15	2.23414839240163	0.067553154815242	0.710373006148027	0.00345501868912967	0.280369158955042
Session 2	193 nm	610-16	2.21282503023584	0.0676394334367037	0.709674817772391	0.00340285026099529	0.305215048001825
Session 2	193 nm	610-17	2.21586177852029	0.0674713761366227	0.711549118509207	0.00282930882596301	0.375054822950217
Session 2	193 nm	610-18	2.23009889106783	0.0675882054492543	0.708154746652987	0.00334214727870059	0.290768327766111
Session 2	193 nm	610-19	2.23331086941923	0.0683680790593227	0.709515576147902	0.00322069161748517	0.391093230102532
Session 2	193 nm	610-20	2.21144233191289	0.0678842875194293	0.706107818423428	0.00281503437255832	0.41173491798913
Session 2	193 nm	610-21	2.24377272681384	0.0683570279439894	0.709376973683323	0.0032922016055584	0.423270067578808
Session 2	193 nm	MicaMg-1	153.353435988792	4.95427132108793	1.84586160068593	0.020617474681446	0.518553698092044
Session 2	193 nm	MicaMg-2	156.28363064631	5.48199549196744	1.83497007583792	0.0234146024512068	0.270192872373763
Session 2	193 nm	MicaMg-3	156.191688309994	5.41326049928762	1.88181169107064	0.0205445726865261	0.397640926099717
Session 2	193 nm	MicaMg-4	152.37157891115	5.32543577013805	1.84714566414713	0.0246731613873597	0.327965340143445
Session 2	193 nm	MicaMg-5	160.626980318312	5.98825092858072	1.86079817905628	0.0184068601271683	0.28246083492586
Session 2	193 nm	MicaMg-6	150.428547329378	5.08672460450557	1.85326279921579	0.0202712382501586	0.117816546280405
Session 2	193 nm	MicaMg-7	159.97262353038	7.43684480584146	1.84188748779976	0.0230285427888384	0.629273012503914
Session 2	193 nm	MicaMg-8	157.357166332515	7.38528498185304	1.8476857878314	0.0226116762792249	-0.12196822771504
Session 2	193 nm	MicaMg-9	153.045334713462	6.15139596013065	1.84059752106555	0.0260298439189108	0.445820092699837
Session 2	193 nm	MicaMg-10	154.13487504923	5.2536759917933	1.86206347374182	0.0224833534653178	0.37653986833816
Session 2	193 nm	MicaMg-11	161.103211548096	6.5493959857399	1.84826109873412	0.0249817891858555	0.177721219693814
Session 2	193 nm	MicaMg-12	154.618825447986	5.58813068588441	1.8445883198478	0.0285908413292749	0.289604222948097
Session 2	193 nm	MicaMg-13	156.709327560778	6.8967315863467	1.8339346617748	0.0247789846872822	0.124318167890213
Session 2	193 nm	MicaMg-14	155.176900311648	5.25292768322029	1.86623088917283	0.0202310305772032	0.323049532934711
Session 2	193 nm	MicaMg-15	154.88471367714	4.95976304463803	1.87264450240096	0.0199961334552137	0.447562673615024
Session 2	193 nm	MicaMg-16	152.646681977897	5.71226157087513	1.82987185575665	0.0246665792990237	0.329698071131756
Session 2	193 nm	MicaMg-17	153.953738768454	5.62780090444506	1.84789745054153	0.0302430176396449	0.500381214605893
Session 2	193 nm	MicaMg-18	157.796258945262	6.19405922931998	1.86187172536943	0.023904313853738	0.45245134414126
Session 2	193 nm	MicaMg-19	155.505302152741	5.80351857280604	1.87612017394929	0.0226590141127768	0.157114865775402
Session 2	193 nm	MicaMg-20	156.179385430367	5.32654867751017	1.85726199159371	0.0232692648031183	0.135282476673714
Session 2	193 nm	MicaMg-21	155.259793050107	5.49231075591501	1.85231920563678	0.0230266153187906	0.383718461053579
Session 2	193 nm	610-1	2.2383506972551	0.057157995602954	0.706380566300592	0.00347034043925929	0.292453995679914
Session 2	193 nm	610-2	2.21624134059353	0.0562109302216642	0.709439405934505	0.00418513194950124	0.491368195129256
Session 2	193 nm	610-3	2.24969790092922	0.055895533003561	0.707909898324167	0.00321240775131183	0.396840597405045
Session 2	193 nm	610-4	2.23558965815225	0.0568556343851278	0.709744974663255	0.00365520680125481	0.534717168163225
Session 2	193 nm	610-5	2.23931907579038	0.0560519351419028	0.707742682693993	0.00357579250190841	0.39100741785514
Session 2	193 nm	610-6	2.23330936400698	0.0563229667422334	0.708225618285637	0.00343584035815861	0.264602758619596
Session 2	193 nm	610-7	2.22619234326606	0.0544282060394928	0.710918953222564	0.00327853608281644	0.17525384419104
Session 2	193 nm	610-8	2.22870438607935	0.0563445179167874	0.709083741483783	0.00394912301287812	0.474459601870147
Session 2	193 nm	610-9	2.22222628942334	0.0563890186273314	0.709293834113537	0.00327525853873576	0.286638405385096
Session 2	193 nm	610-10	2.22714666068291	0.055926151548212	0.710735280523991	0.00360945237944977	0.362462473241722
Session 2	193 nm	610-11	2.21978413362008	0.0554654251380787	0.711444605764631	0.00302447610899956	0.164841829790747
Session 2	193 nm	610-12	2.22589433910223	0.0554253424961421	0.708347346548168	0.00339423332371925	0.265123856649785
Session 2	193 nm	610-13	2.23048173323225	0.0558746609522491	0.709377997054733	0.00329620409506713	0.285148087178553
Session 2	193 nm	610-14	2.23041252917346	0.0552285944236802	0.709986551218149	0.00308380385242945	0.193177908705294
Session 2	193 nm	610-15	2.2348402724246	0.0557737547757082	0.709252630372331	0.00279832161555126	0.294688899004567
Session 2	193 nm	610-16	2.22838548832739	0.055106149289583	0.712619915294152	0.00304621137729158	0.283121397771434
Session 2	193 nm	610-17	2.22099455329415	0.0563810275832977	0.711325095841399	0.00303280130101678	0.435034816042151
Session 2	193 nm	610-18	2.23534089070893	0.0559083674602073	0.711520191941272	0.00268493806369226	0.352969219591951
Session 2	193 nm	610-19	2.23140406314851	0.0566565606792179	0.711761901650851	0.00453349501270555	0.430737227140866
Session 2	193 nm	610-20	2.2307385300565	0.0574114461066932	0.70960090611934	0.00337059216564153	0.558581999788461
Session 2	193 nm	610-21	2.22784301712879	0.055768769889433	0.708966902648949	0.00327683926217012	0.256382459005043
Session 2	193 nm	MicaMg-1	154.80920847389	4.46753218143341	1.84510961983333	0.0249232860875085	0.081233501721128
Session 2	193 nm	MicaMg-2	154.89794654199	6.19424018010957	1.83602420325581	0.0262129951829493	0.211969863880227
Session 2	193 nm	MicaMg-3	156.932732393954	4.65866253673209	1.86508042226675	0.0260357352459703	0.551545003164782
Session 2	193 nm	MicaMg-4	157.515525530392	4.81197912643806	1.87153283260378	0.0285006668895459	-0.112863673815947
Session 2	193 nm	MicaMg-5	156.556962562243	4.68651064404306	1.87160355731321	0.0217446280626435	0.265247884398432
Session 2	193 nm	MicaMg-6	156.677891145476	6.0959397616684	1.87122137982077	0.0502711119074572	0.744681770679297
Session 2	193 nm	MicaMg-7	152.355141961383	5.31136131378824	1.85248594266561	0.0299267252526738	0.000452698059583683
Session 2	193 nm	MicaMg-8	155.40874692449	5.33678912374354	1.85157653386139	0.026524707185595	0.612113288167185
Session 2	193 nm	MicaMg-9	157.252183091877	5.25634589161223	1.86023274297572	0.0275665857063566	0.117691107360674
Session 2	193 nm	MicaMg-10	155.883887464115	4.88001880575774	1.86278999119913	0.0151119087192801	0.230572149197027
Session 2	193 nm	MicaMg-11	157.813051959585	5.83296895001676	1.86549262854363	0.023979823649378	-0.284278906490073
Session 2	193 nm	MicaMg-12	151.053410165958	4.42864239118492	1.8587818402388	0.0282238058943513	0.222610457876243
Session 2	193 nm	MicaMg-13	158.06346628399	6.2508105813425	1.83523869257798	0.0255514066693202	0.32286582432526
Session 2	193 nm	MicaMg-14	158.334633445897	7.29665331410987	1.84775006394891	0.0271473836395826	-0.0306161986957726
Session 2	193 nm	MicaMg-15	151.135408981836	4.83211114777477	1.84463513138138	0.0281525834988729	0.451268458797718
Session 2	193 nm	MicaMg-16	159.263035619468	6.69953997929329	1.83784453026903	0.0345678528068756	0.347651574186399
Session 2	193 nm	MicaMg-17	155.774764081229	6.03609377997946	1.8623552116474	0.0317388272824034	0.605431644064267
Session 2	193 nm	MicaMg-18	155.031533095672	4.7691835507128	1.86536395735857	0.0186188199109935	0.327461024309585
Session 2	193 nm	MicaMg-19	152.906024797873	4.72317269998042	1.86352386352695	0.0323257861622778	0.572507574931736
Session 2	193 nm	MicaMg-20	152.576358828445	5.21630708070157	1.8622033608595	0.0293427936565625	0.443475174370597
Session 2	193 nm	MicaMg-21	157.358086650237	4.50119953039613	1.87571682065209	0.0234947512640115	0.118360184808916
Session 3	193 nm	610-1	2.14591012543427	0.089325244062191	0.706186916035924	0.0088088159200617	0.617455599008432
Session 3	193 nm	610-2	2.08401228253438	0.0790791820995738	0.708442686941769	0.00774490818513057	0.203534097253116
Session 3	193 nm	610-3	2.12598361534448	0.076346561033452	0.713331722037574	0.0081301109777681	0.360039677603212
Session 3	193 nm	610-4	2.09774556748728	0.0751898932110461	0.708683523694816	0.00763413271469222	0.288515682268647
Session 3	193 nm	610-5	2.12739565120861	0.0821409777691837	0.706749301226059	0.00991665531454523	0.371187367458333
Session 3	193 nm	610-6	2.14264219730374	0.0859401275821061	0.715515806870948	0.0107701160538382	-0.00998448035786859
Session 3	193 nm	610-7	2.13892176466935	0.0854404111389716	0.70641592435869	0.00985916651622662	0.378350674409629
Session 3	193 nm	610-8	2.13387252374361	0.082094586356348	0.716430492273234	0.00823459430408874	0.370689709367018
Session 3	193 nm	610-9	2.1141035028509	0.0799260202613057	0.707445491958378	0.00862062994909686	0.462485198205029
Session 3	193 nm	610-10	2.11103245319532	0.0777427021498011	0.707788134602606	0.008542576862354	0.180915347983321
Session 3	193 nm	MicaMg-1	158.478434459452	5.74842383627249	1.8591344787306	0.0318982740005221	0.501109925293095
Session 3	193 nm	MicaMg-2	157.346307152055	5.59019627244141	1.90109239992413	0.032293642138997	0.597828911712824
Session 3	193 nm	MicaMg-3	157.530845631781	5.51734721301055	1.86330302099325	0.0279408727041822	0.419472961938915
Session 3	193 nm	MicaMg-4	156.728797818108	5.92125734138904	1.89185044942726	0.0330101080490338	0.53911494220129
Session 3	193 nm	MicaMg-5	159.785740491256	5.95359955027903	1.87544841320801	0.0331398217243492	0.492373221519591
Session 3	193 nm	MicaMg-6	155.65089003234	5.77749487609956	1.83521262918921	0.0351630907080361	0.564345494615682
Session 3	193 nm	MicaMg-7	153.248270271493	5.44901168958364	1.85370070822857	0.0303672047106948	0.586321740149156
Session 3	193 nm	MicaMg-9	152.517939774763	5.63939048136988	1.83995299408056	0.035899101064911	0.564054105233366
Session 3	193 nm	MicaMg-10	149.112774368753	5.48105116274698	1.85149803869664	0.0376409517211391	0.557232103754593
Session 3	193 nm	610-1	2.18681132883954	0.0881540477273489	0.711141067501141	0.00688751450785324	0.322762058729844
Session 3	193 nm	610-2	2.22800755202459	0.0888308958093119	0.711502161127925	0.00823728594411293	0.157904691577125
Session 3	193 nm	610-3	2.17640348084543	0.082532774737497	0.712335674817212	0.00752128800359465	0.152006006131236
Session 3	193 nm	610-4	2.13366320053955	0.0871143258392943	0.714188626261689	0.00726552481621198	0.301226201635499
Session 3	193 nm	610-5	2.14533762608469	0.104975498577683	0.707815427333002	0.00893419872204008	0.542743392871916
Session 3	193 nm	610-6	2.19362190874042	0.0942131423710452	0.707645609128499	0.00970446443197232	0.0228613439619328
Session 3	193 nm	610-7	2.20408646481212	0.0932889868792212	0.70790742969463	0.0115937301630351	0.249149707186951
Session 3	193 nm	610-8	2.14036168982574	0.0905397687572289	0.705318746539138	0.00740398799129489	0.240682982416577
Session 3	193 nm	610-9	2.11182263032394	0.078875199070776	0.712152465681826	0.00673657920956081	0.232560970527507
Session 3	193 nm	610-10	2.16971372810051	0.0822984510150004	0.706982791914939	0.00587541505785155	0.259235362158455
Session 3	193 nm	MicaMg-1	159.920689390245	6.54464137586333	1.87609934032472	0.0310091262404229	0.766584448279092
Session 3	193 nm	MicaMg-2	154.690464868069	5.98930375785463	1.86978779897141	0.0328705040786762	0.555651870772208
Session 3	193 nm	MicaMg-3	154.056631357448	6.11400795035344	1.86992140781038	0.0277919472353879	0.530660900677726
Session 3	193 nm	MicaMg-4	158.41985382468	6.2000549317395	1.88213224867619	0.0346997243645935	0.451051280503349
Session 3	193 nm	MicaMg-5	153.07569887158	5.68228570204635	1.83770699248432	0.0251969189212584	0.527186194557641
Session 3	193 nm	MicaMg-6	158.966892466809	5.91164636746217	1.85966750160627	0.0282550647218253	0.629240307243706
Session 3	193 nm	MicaMg-7	151.135641219343	5.65477208698744	1.84184994243882	0.029464254803381	0.491235801510913
Session 3	193 nm	MicaMg-8	155.235569046956	6.01383028006011	1.87012178595373	0.0313720976521442	0.606065702021144
Session 3	193 nm	MicaMg-9	156.366288823339	6.00016551274805	1.82870028714104	0.0305066116859994	0.691290359899952
Session 3	193 nm	MicaMg-10	154.132270131532	6.13105400416627	1.87711527755008	0.0286278773951795	0.558496555096531
Session 3	193 nm	610-1	2.06868064799474	0.121228989700621	0.707720647598742	0.00859232687503831	0.115196117048412
Session 3	193 nm	610-2	2.08134114717597	0.122625694423389	0.709469083203112	0.00980240901978841	0.475322987039734
Session 3	193 nm	610-3	2.00953644419538	0.118125469489416	0.708184687977606	0.0105735582473083	0.517983478733016
Session 3	193 nm	610-4	2.00872679102119	0.116683465124589	0.709888647708363	0.0108813200259188	0.156627697357021
Session 3	193 nm	610-5	2.03586652935237	0.122279623554202	0.710985051186761	0.0103167843380955	0.589439050832331
Session 3	193 nm	610-6	2.0240565247233	0.118873118049651	0.703031126019308	0.00943037749327352	-0.134407403985128
Session 3	193 nm	610-7	2.04258035546471	0.117776533882211	0.709011435765368	0.0108671498151857	0.383982393605889
Session 3	193 nm	610-8	2.02982798142221	0.116909356534721	0.710699530104739	0.00962835241987386	0.0228208923329675
Session 3	193 nm	610-9	2.08119650294871	0.119160152664697	0.71894994740703	0.00986349808264506	0.257241855926227
Session 3	193 nm	610-10	2.0478956860716	0.120013403021721	0.709049843028972	0.0101959128138521	0.360669672589764
Session 3	193 nm	MicaMg-1	148.82896102344	8.42756992176835	1.86316083615104	0.0336919194961068	0.591733713173322
Session 3	193 nm	MicaMg-2	149.993237225519	8.38674353678968	1.84343080181902	0.0265827178133723	0.526046036412547
Session 3	193 nm	MicaMg-3	156.582313489106	8.76931300841117	1.85573781509508	0.0290379667083205	0.363201801050987
Session 3	193 nm	MicaMg-4	152.616118703782	8.35852661556824	1.85546775285539	0.0275453262418748	0.425098899218984
Session 3	193 nm	MicaMg-6	155.943499189165	8.91647501151296	1.86777029792699	0.0314079359721478	0.438809264901252
Session 3	193 nm	MicaMg-7	160.713629961681	8.99986124986262	1.86439799756943	0.0278098824703145	0.34689244582409
Session 3	193 nm	MicaMg-8	157.935081370677	8.78143816723127	1.84490087318682	0.0334462635850636	0.394768847604318
Session 3	193 nm	MicaMg-9	159.927975826316	8.99671400643967	1.84893740323308	0.0291156996795511	0.421113689939489
Session 3	193 nm	MicaMg-10	157.859183210314	8.7731764687568	1.86814637359712	0.0358012842091235	0.521721722669611
Session 3	193 nm	610-1	2.40629900332439	0.130247468786723	0.711972472819657	0.0102551686983945	0.263837575693647
Session 3	193 nm	610-2	2.33828557096821	0.130864440333908	0.712136652081449	0.00905523546499642	0.238978810083731
Session 3	193 nm	610-3	2.36604867177795	0.134524257800226	0.709747370490565	0.00949396557023538	0.232382477047063
Session 3	193 nm	610-4	2.35923527569535	0.134165500424067	0.711562470142481	0.00806426167159376	0.0688629447604919
Session 3	193 nm	610-5	2.38460320499216	0.133129876794009	0.708852249459755	0.0102720013337424	0.166216092661278
Session 3	193 nm	610-6	2.3864126008196	0.132952098877965	0.70485314568606	0.0105268860475183	0.213440911104075
Session 3	193 nm	610-7	2.35696413039971	0.129728714901649	0.700509228442334	0.0102796482157609	0.104656245186199
Session 3	193 nm	610-8	2.3412447119757	0.131018245098285	0.709437622168402	0.00878754909321744	0.313775286042421
Session 3	193 nm	610-9	2.43648568179195	0.133790257499418	0.715176281387844	0.0104248165783709	0.0256028926192256
Session 3	193 nm	610-10	2.35638662096752	0.132257704721249	0.712742507321454	0.00761289539697845	0.287654610931844
Session 3	193 nm	MicaMg-1	157.998353101252	9.04705485244647	1.83857105251217	0.0342068304664017	0.605384568941305
Session 3	193 nm	MicaMg-2	162.264318328114	9.17005143983488	1.89158993753847	0.0353223121233714	0.570258510492563
Session 3	193 nm	MicaMg-3	159.418362630617	8.96983081200104	1.87247852782822	0.0336050836151079	0.385587805729603
Session 3	193 nm	MicaMg-4	155.136708408802	8.50281364016026	1.87376828165405	0.0331185915292862	0.494910185859456
Session 3	193 nm	MicaMg-5	149.983307614431	9.19674954230969	1.81755635845206	0.0451258882017602	0.699033133961221
Session 3	193 nm	MicaMg-6	157.437179665518	8.70402975529776	1.84190179904751	0.0357389186065732	0.433911137062064
Session 3	193 nm	MicaMg-7	156.621703317012	8.66126485364305	1.91437558426978	0.0413533676099513	0.547375835379967
Session 3	193 nm	MicaMg-8	151.756382966365	8.9449628704322	1.87286838856737	0.0408258913223327	0.511667037893145
Session 3	193 nm	MicaMg-9	153.015584077296	8.53341379163701	1.82976807180623	0.0317259565423855	0.644013044485075
Session 3	193 nm	MicaMg-10	152.368099890592	8.36418450408242	1.86187742230982	0.0390347239729424	0.678841365936263
Session 3	193 nm	610-1	2.35497145549569	0.121303325588011	0.7062017670087	0.0132317811288299	0.0623853375125872
Session 3	193 nm	610-2	2.36660838985801	0.123323364887106	0.713125808224972	0.0109655221087922	0.413218659456038
Session 3	193 nm	610-3	2.3268628843782	0.123403462963052	0.716689375083766	0.0119325532473218	0.304965755738624
Session 3	193 nm	610-4	2.38830769930365	0.12076785723712	0.704632121518025	0.0114443167809674	0.184254882420722
Session 3	193 nm	610-5	2.41349467353534	0.124229946752582	0.706896226971778	0.0145131156200793	0.274454521881477
Session 3	193 nm	610-6	2.41719931555564	0.131851138266964	0.70940624363404	0.012666538811182	-0.0421704398970622
Session 3	193 nm	610-7	2.30508452163431	0.12044828348593	0.706182800025663	0.0128276984565754	0.209958183134191
Session 3	193 nm	610-8	2.34534857657175	0.122314243834113	0.720417023428572	0.0134714687068239	0.282302449998501
Session 3	193 nm	610-9	2.3507032704727	0.118100754504674	0.706898713555608	0.0108982422785494	0.0697584304510403
Session 3	193 nm	610-10	2.33082519993096	0.118341859797291	0.706539920548874	0.0122139936248683	0.102092827139557
Session 3	193 nm	MicaMg-1	167.019056971452	8.6886460561134	1.87316038236304	0.0445558400150967	0.509664816429856
Session 3	193 nm	MicaMg-2	156.535573776181	8.45653515646587	1.8805722833406	0.04611520497175	0.49789375218095
Session 3	193 nm	MicaMg-3	157.20577809632	8.20372853541467	1.83152606391999	0.0482445294281839	0.565251500796046
Session 3	193 nm	MicaMg-4	157.435112946965	8.12255505802831	1.85159331252926	0.0456127744775693	0.65385251008436
Session 3	193 nm	MicaMg-5	157.236407060827	8.07037890023532	1.87616222412616	0.0393535786142613	0.683722625058878
Session 3	193 nm	MicaMg-6	147.083842633143	9.04226822506755	1.77910301715422	0.0521698397620134	0.675043719883056
Session 3	193 nm	MicaMg-7	150.585689920595	7.70586565413259	1.84655816250286	0.0417771247723855	0.48507590999019
Session 3	193 nm	MicaMg-8	153.55773281989	8.03663150571274	1.83394233921102	0.0501771096607212	0.519855183977049
Session 3	193 nm	MicaMg-9	152.817106267959	7.86409184686632	1.85964587008172	0.0428964322385152	0.681073831857733
Session 3	193 nm	MicaMg-10	156.523699506668	8.0448440754229	1.8697040245673	0.0414473442361201	0.377535213369583
Session 3	193 nm	610-1	2.21444088777319	0.114832505147311	0.70852545920015	0.0095511086856009	0.17819784486054
Session 3	193 nm	610-2	2.15730512375038	0.108580969760017	0.707500126703423	0.0101282892811156	0.301385584630417
Session 3	193 nm	610-3	2.16852804354907	0.108166274285158	0.708954513028967	0.00839120844189646	0.0346757464001367
Session 3	193 nm	610-4	2.16801701522579	0.107686449526017	0.715275988188127	0.0092564525576626	0.182575899729988
Session 3	193 nm	610-5	2.13230249009512	0.106980570812073	0.706704873178848	0.00917729727472636	0.249069655201071
Session 3	193 nm	610-6	2.17021448125836	0.113958260746174	0.715758893238253	0.0120219137260975	0.261384599521708
Session 3	193 nm	610-7	2.19291318805804	0.115613391227605	0.708913336527379	0.0124906691533686	0.298908729218418
Session 3	193 nm	610-8	2.13356620008766	0.12931136787349	0.712308702294584	0.01520418951327	0.581157419270344
Session 3	193 nm	610-9	2.10580349917274	0.113939005578765	0.700798490429577	0.0113629538276582	0.31417165443347
Session 3	193 nm	610-10	2.14644671545256	0.119294505258361	0.712249617210693	0.0129542536449424	0.481360634040222
Session 3	193 nm	MicaMg-1	151.854008777494	7.79024236800462	1.86399791913252	0.036401272137467	0.226277046191126
Session 3	193 nm	MicaMg-2	154.475140307102	7.86741997061701	1.82546642305923	0.0314866826027732	0.428682237598115
Session 3	193 nm	MicaMg-3	162.087461515541	8.67827742904054	1.88589980992599	0.042386320534396	0.592876448679778
Session 3	193 nm	MicaMg-4	152.926644857185	7.9722538546066	1.85396054349397	0.0391445138553634	0.632247131054187
Session 3	193 nm	MicaMg-5	157.025900633783	8.2219010034864	1.8759744649377	0.0399948186629894	0.636743514199125
Session 3	193 nm	MicaMg-6	157.220904175082	8.05144497766375	1.83886191770955	0.0322555694833521	0.650008230248464
Session 3	193 nm	MicaMg-7	154.855707642028	7.69477414719551	1.86310317749752	0.0289501189654919	0.316538436420807
Session 3	193 nm	MicaMg-8	160.069331380232	8.22767565706573	1.89662973345132	0.0352817547753874	0.388103019468868
Session 3	193 nm	MicaMg-9	150.979541394613	7.54856693742828	1.84296284440981	0.0307256420150688	0.521280774692434
Session 3	193 nm	MicaMg-10	154.50535931694	7.93418016461258	1.84607553432455	0.0365163267463691	0.550307067867524
Session 3	193 nm	610-1	2.23863099759746	0.0617310664425224	0.718876635508212	0.0115055842603656	0.16286617024291
Session 3	193 nm	610-2	2.19487585824132	0.0580007791435646	0.708600906058584	0.0103777851992547	0.356326653168059
Session 3	193 nm	610-3	2.15181104198855	0.053896506269988	0.708005847925609	0.00826125321392213	0.15627407594975
Session 3	193 nm	610-4	2.14189852252392	0.0658678929555758	0.711190503219868	0.0123756954388048	0.245555551097601
Session 3	193 nm	610-5	2.15370584094968	0.0524034571625499	0.705302154574561	0.00814534301743985	0.379960893066857
Session 3	193 nm	610-6	2.17390043053056	0.0441659670991571	0.710243727464533	0.00789191776967902	0.521535734560338
Session 3	193 nm	610-7	2.17774260347074	0.0796053485303296	0.70816189503162	0.0142986493619562	0.17093967603237
Session 3	193 nm	610-8	2.19376230708922	0.0465656938874415	0.706443176852645	0.00785060723121234	0.470569811371179
Session 3	193 nm	610-9	2.16962808260868	0.0492582352078498	0.710466153364367	0.00779394900960593	0.246334817364522
Session 3	193 nm	MicaMg-1	151.623281669046	2.4088585225591	1.83628312529208	0.0265469677149434	0.452051082415462
Session 3	193 nm	MicaMg-2	153.759728066919	3.24101869565418	1.87453450647689	0.0341432003071771	0.575396437999484
Session 3	193 nm	MicaMg-3	157.000635895239	3.40395644900449	1.87739724504836	0.0325419694637582	0.727666753494616
Session 3	193 nm	MicaMg-4	155.020203344281	3.30685323311833	1.87913755445145	0.0299492025026327	0.531927552476085
Session 3	193 nm	MicaMg-5	156.726090237767	3.68291614354817	1.85076332704967	0.026673495114534	0.602079279714457
Session 3	193 nm	MicaMg-6	156.696792519383	2.45027448776642	1.85717411387469	0.0259181907447412	0.572668140634468
Session 3	193 nm	MicaMg-7	154.635582250815	3.10301238600126	1.86838528727054	0.0336773116542456	0.630644717897683
Session 3	193 nm	MicaMg-8	156.477748958686	2.9413401118768	1.87929831354046	0.0363273190882115	0.682170323517833
Session 3	193 nm	MicaMg-9	158.459937057863	2.68160223090969	1.90588800789144	0.0283885284518071	0.397777179381759
Session 4	193 nm	610-1	2.23433756080666	0.0216533839234139	0.709434855647043	0.00457666917094725	0.358154014821911
Session 4	193 nm	610-2	2.24683844773804	0.021884384164184	0.711701867066158	0.00387223043676658	0.335655698193749
Session 4	193 nm	610-3	2.24211241884644	0.0220009354282349	0.709852208779598	0.00443039061362779	0.0243899327846259
Session 4	193 nm	610-4	2.25274224463864	0.0190035853614517	0.708848966094528	0.00415560685466064	-0.0680747284301351
Session 4	193 nm	610-5	2.24079035164179	0.01979278426516	0.711582708853791	0.00384400536265811	0.000340173375733819
Session 4	193 nm	610-6	2.2403915515352	0.0229086772446499	0.70665857536016	0.0047379537863322	0.178690594490146
Session 4	193 nm	610-7	2.23383720502753	0.0197228053281092	0.707600074202502	0.00426226909776825	0.27310568933621
Session 4	193 nm	610-8	2.24638635968158	0.0181280037296582	0.711277560403718	0.0042994132331766	0.266668897454606
Session 4	193 nm	610-9	2.25520705375365	0.0204940514135371	0.711143264712429	0.00442546816171317	0.262095253132673
Session 4	193 nm	610-10	2.24704353612438	0.0201973259439137	0.708889918880072	0.00394172477486332	0.249171152156038
Session 4	193 nm	MicaMg-1	153.592609222289	3.62336418441951	1.83479525755705	0.0302668734086946	0.275117195849534
Session 4	193 nm	MicaMg-3	155.558579284116	2.66452159405598	1.85730425249939	0.0252609377561296	0.685015062934151
Session 4	193 nm	MicaMg-4	156.946758625833	2.66128231756681	1.864684207367	0.02826217710234	0.337975392991569
Session 4	193 nm	MicaMg-5	155.881282055712	2.83112597064864	1.88350637047275	0.0347840810153364	0.610487595074876
Session 4	193 nm	MicaMg-6	157.307588635421	2.95699077169475	1.88654461953527	0.0296699879418846	0.622084350315453
Session 4	193 nm	MicaMg-7	156.103667290182	2.65001772720503	1.85841313068229	0.0281413940622215	-0.0511948679374338
Session 4	193 nm	MicaMg-8	156.970752573952	2.84015224784199	1.88486821321949	0.0303784417476652	0.789023608668957
Session 4	193 nm	MicaMg-9	153.804965846435	2.86843353854469	1.8418115087908	0.0295350825650314	0.710038116357067
Session 4	193 nm	MicaMg-10	157.365869128119	2.9797655065165	1.86042913991036	0.0226572818958138	0.40991619904839
Session 4	193 nm	610-1	2.24094188855052	0.0504280780422575	0.710142536707243	0.00294261831597713	-0.21519164139973
Session 4	193 nm	610-2	2.26396089885035	0.0503748416082206	0.711718196168078	0.00409050514625869	0.350551040536647
Session 4	193 nm	610-3	2.25285923621919	0.0517948746766979	0.711044775361848	0.00398818069913411	0.249774252744872
Session 4	193 nm	610-4	2.25724121696496	0.0511884086780864	0.709814940475741	0.00306460912730368	0.0722678560036935
Session 4	193 nm	610-5	2.25600587136554	0.0504950316719289	0.71158588612472	0.00330278471526851	0.188916448217877
Session 4	193 nm	610-6	2.25914741453453	0.0504532464941506	0.707936380703641	0.00312721925935069	0.450831795414892
Session 4	193 nm	610-7	2.26658273826651	0.0514856085453855	0.709246045298146	0.00294473053763699	0.19124495720659
Session 4	193 nm	610-8	2.24990499443353	0.0509146088192867	0.708019783650997	0.00348669627961747	0.306378592080715
Session 4	193 nm	610-9	2.25243018168201	0.0526009597460455	0.709871409806214	0.00352911529124746	0.288063132746543
Session 4	193 nm	610-10	2.26198570135156	0.0509065807567669	0.707610045703373	0.00463950321302522	0.205849321870435
Session 4	193 nm	MicaMg-1	150.6155052332	4.05507954717151	1.85396717664219	0.0248272348792726	0.44352772906731
Session 4	193 nm	MicaMg-2	153.527985691157	3.72499195214652	1.84355190109931	0.0171424117465901	0.472910281293386
Session 4	193 nm	MicaMg-3	159.036583950773	4.78295500086597	1.86177835528988	0.0393104768706527	0.689435520887739
Session 4	193 nm	MicaMg-4	157.853669150996	4.15628495588083	1.84966317779617	0.0176123168014754	0.440488228230559
Session 4	193 nm	MicaMg-5	157.294781730157	3.8048849934541	1.87313366967521	0.0177259763819221	0.482967479093746
Session 4	193 nm	MicaMg-6	156.134707082813	3.76004248627333	1.87575248930365	0.0207388582399034	0.60306848046362
Session 4	193 nm	MicaMg-7	155.674767524932	4.28778380511525	1.85783367004164	0.0215064382578521	0.185641625851384
Session 4	193 nm	MicaMg-8	154.059124036032	3.92371966842794	1.85689887382151	0.0212473532315302	0.668838660282473
Session 4	193 nm	MicaMg-9	155.452847730632	4.88441892563748	1.85560508253741	0.0248047978914161	0.583412397638244
Session 4	193 nm	MicaMg-10	156.350027869308	3.75747124010003	1.85339513777703	0.0185480583626594	0.455850805521214
Session 4	193 nm	610-1	2.26335200191715	0.0571926002705009	0.712009336370224	0.00530266034018753	0.47322194078345
Session 4	193 nm	610-2	2.25883348310406	0.0587703841284265	0.711452761836879	0.00466344086157844	0.116795544236261
Session 4	193 nm	610-3	2.25516799364336	0.0570178464580817	0.708480675415686	0.00513167654935131	0.210532562658837
Session 4	193 nm	610-4	2.26075652180573	0.0588469692032859	0.71191261513675	0.00453706897042899	0.00248270806291698
Session 4	193 nm	610-5	2.24869504964969	0.0558748187867213	0.70801704531789	0.00476883565962235	0.371614967968992
Session 4	193 nm	610-6	2.28663317403735	0.057872580767667	0.712685427767655	0.00508327621897697	0.112918658138471
Session 4	193 nm	610-7	2.26691728886945	0.0595351687149317	0.707806414920275	0.00452432547060091	0.152813709706177
Session 4	193 nm	610-8	2.2678988524731	0.0603257221203905	0.710962364458483	0.00539101222388921	0.139522009732871
Session 4	193 nm	610-9	2.25248029725079	0.0579440999165897	0.70704165736843	0.0049592171672376	0.26550707218425
Session 4	193 nm	610-10	2.25494779842759	0.0578745427677847	0.706621701407727	0.0055338482069537	0.316180458644952
Session 4	193 nm	MicaMg-1	155.675609052327	4.21022246873079	1.86515627032551	0.0221628575476044	0.27886880219603
Session 4	193 nm	MicaMg-2	153.624535628643	4.27455942119696	1.85337598690958	0.0329070201694647	0.618154148610992
Session 4	193 nm	MicaMg-3	153.887892509891	4.00356723256201	1.84108348361392	0.0290152843699904	0.196917193847456
Session 4	193 nm	MicaMg-4	155.528418306411	4.70414901227808	1.85612731877663	0.0315593263094423	0.600608860360151
Session 4	193 nm	MicaMg-5	156.542459638089	4.14378991579384	1.86160444633267	0.0245780786116624	0.544660071003533
Session 4	193 nm	MicaMg-6	158.466725967107	4.29676434172411	1.87972243523247	0.024594457326664	0.569889265607929
Session 4	193 nm	MicaMg-7	154.481585716107	4.19188990411915	1.84551998158578	0.0259370608570045	0.282068151521274
Session 4	193 nm	MicaMg-8	157.769376480033	4.03949960155127	1.86560503553582	0.0174639340353649	0.390835054204579
Session 4	193 nm	MicaMg-9	153.872713186476	4.21670062260711	1.84489629190538	0.0218773768672082	0.598971632445503
Session 4	193 nm	MicaMg-10	156.150683514916	4.13861246272024	1.85280461162592	0.0235070205127026	0.554642910431779
Session 4	193 nm	610-1	2.2372617957252	0.0879384051905625	0.708733768226776	0.00474147789363154	0.258140683962704
Session 4	193 nm	610-2	2.22471894288622	0.0874310952263737	0.709357418076753	0.00443710829763591	0.239171376768301
Session 4	193 nm	610-3	2.24532842493822	0.0891355969422652	0.709754305897568	0.00519260919868838	0.156804012295149
Session 4	193 nm	610-4	2.23170483605523	0.0885754200489582	0.706881486440585	0.00465471984928516	0.5539921905134
Session 4	193 nm	610-5	2.25218921930232	0.0894063330740382	0.708849325954073	0.00466282814874691	0.106479803485002
Session 4	193 nm	610-6	2.24163501192598	0.0902351461844337	0.708454647430505	0.00517585624657676	0.453719687257795
Session 4	193 nm	610-7	2.24951346767144	0.088760065633072	0.712027824003204	0.00480956972034034	0.253475932900324
Session 4	193 nm	610-8	2.24678163829774	0.0873579005253678	0.713563550933441	0.004521882814766	0.39288686447816
Session 4	193 nm	610-9	2.24619815748625	0.0886886017877008	0.709646137354665	0.00518571364057481	0.207511436595731
Session 4	193 nm	610-10	2.24317075731814	0.0889512937867837	0.70972153568243	0.00501342723992971	0.512885615073834
Session 4	193 nm	MicaMg-1	159.448573903395	6.46408310687988	1.86230618154624	0.0230625621421698	0.335648454307828
Session 4	193 nm	MicaMg-2	155.031673489756	6.19028912961404	1.85396079809568	0.0198613631642281	0.614531714706399
Session 4	193 nm	MicaMg-3	155.598664610307	6.24972559915406	1.8655869008387	0.0207017714939298	0.449234849556844
Session 4	193 nm	MicaMg-4	157.002786730618	6.59013203094884	1.85717460795246	0.0233923899910785	0.53754055881979
Session 4	193 nm	MicaMg-5	156.807397115197	6.26429125679612	1.84932191684673	0.0236497051673487	0.604570958568868
Session 4	193 nm	MicaMg-6	156.571980103352	6.48459416662252	1.85215552201076	0.0254763758744476	0.400628286643945
Session 4	193 nm	MicaMg-7	153.685340801625	6.078788724154	1.87733033892369	0.0218196925110659	0.472114475209801
Session 4	193 nm	MicaMg-8	149.247973088938	6.15278558361477	1.85139972486774	0.0268613491029986	0.326819657856772
Session 4	193 nm	MicaMg-9	158.18410315743	6.29982011161348	1.88222395009288	0.0243340965757501	0.618092017666627
Session 4	193 nm	MicaMg-10	154.421506999382	6.17938437715416	1.87283187454617	0.0278561317130624	0.531600156117044
Session 5	193 nm	610-1	2.12715895773454	0.0797164854934148	0.713410867429667	0.00487334223588166	0.100072863998718
Session 5	193 nm	610-2	2.09824971697859	0.0761490768683598	0.70848419840016	0.00415601084514326	0.237950646562539
Session 5	193 nm	610-3	2.14135406046818	0.0786951411888533	0.710790905864942	0.00514217146722477	0.0550683903677663
Session 5	193 nm	610-4	2.1221865549972	0.0774137510532972	0.710018539783308	0.00377004409080855	0.253203930447458
Session 5	193 nm	610-5	2.13652853045608	0.084299787007151	0.712149063266832	0.00448641311920657	0.390081029719012
Session 5	193 nm	610-6	2.13311464850015	0.0774586956134708	0.711146096784064	0.00368165013292746	0.0957167942965082
Session 5	193 nm	610-7	2.13803352644236	0.0797575429503425	0.707653980814305	0.00402370939888017	0.204477164384769
Session 5	193 nm	610-8	2.13645380941113	0.0801799027933728	0.707897381387018	0.0035471981278377	0.410332127243188
Session 5	193 nm	610-9	2.1374873278804	0.0825288016588488	0.706818804603125	0.0052053547347727	0.409303624433674
Session 5	193 nm	610-10	2.12382550027887	0.0842590520128649	0.708620161666578	0.00471208455528001	0.418456316140538
Session 5	193 nm	MicaMg-1	159.092745371641	6.13029342559339	1.86457820273398	0.0232956772500507	0.253099368610051
Session 5	193 nm	MicaMg-2	152.429315594197	5.86556810921399	1.87158148234397	0.0273385313527483	0.371141750269293
Session 5	193 nm	MicaMg-3	157.363551221884	6.59141251165939	1.86478938390231	0.0199575182442915	0.39950575182174
Session 5	193 nm	MicaMg-4	154.596385455812	5.64927276044289	1.85699161266818	0.01938122638787	0.286118501202746
Session 5	193 nm	MicaMg-5	154.412681520609	5.73660103438782	1.83313161841814	0.0222746633544054	0.780768323080281
Session 5	193 nm	MicaMg-6	158.359039857249	6.55114009648569	1.86155806963738	0.0296595882923575	0.048880671677804
Session 5	193 nm	MicaMg-7	157.597541522059	7.21554015356348	1.86791483278754	0.0240808356415605	0.297628858547831
Session 5	193 nm	MicaMg-8	159.573063919084	6.14557458713403	1.870642585754	0.0153843850661873	0.35381976587221
Session 5	193 nm	MicaMg-9	152.544446377925	5.58041898922272	1.87129177663662	0.026644267895026	0.17053464380406
Session 5	193 nm	MicaMg-10	150.031229159541	7.28095743325043	1.86400026528827	0.0271040352402269	0.0507450217189452
Session 5	193 nm	610-1	2.18238032258796	0.0389301480557645	0.707286901275679	0.00405985288713446	0.331984163608401
Session 5	193 nm	610-2	2.15558942380154	0.0364376174350357	0.709399870360962	0.00448649263802266	0.149946419789661
Session 5	193 nm	610-3	2.17073969132168	0.0364399295779862	0.712667602798106	0.00612655576955662	0.160444504571736
Session 5	193 nm	610-4	2.19354980329135	0.0486858673908856	0.710544943072432	0.00449910800395978	0.203467190839597
Session 5	193 nm	610-5	2.20852731415244	0.0443429359105412	0.708943187723768	0.00525740375424333	0.194849726996592
Session 5	193 nm	610-6	2.19313820584515	0.0436663196205369	0.709803484086109	0.00445618576607679	0.138491743872135
Session 5	193 nm	610-7	2.18422534125613	0.0363009971350128	0.709333234083734	0.00447492145416302	0.133179540373232
Session 5	193 nm	610-8	2.17798697234987	0.0431865313844085	0.710784939472783	0.00471792593578116	0.3381495728468
Session 5	193 nm	610-9	2.19238257784142	0.0406506816224849	0.710497474550049	0.00405230740189131	0.413824730991243
Session 5	193 nm	610-10	2.18300065638604	0.042589325397181	0.707728362576377	0.00631589014319569	0.343204125758732
Session 5	193 nm	MicaMg-1	159.437602090355	3.87982924026143	1.85049556179289	0.0261968928493865	0.325240339294281
Session 5	193 nm	MicaMg-2	153.895616929489	3.19663396247435	1.86482184892644	0.0242564538910029	0.288256046803834
Session 5	193 nm	MicaMg-3	155.738619271841	4.52173281250036	1.85360207265582	0.0273962439256379	0.112386197642403
Session 5	193 nm	MicaMg-4	151.562188486166	3.29967693008075	1.87181686931746	0.0203837952200079	0.205870336895629
Session 5	193 nm	MicaMg-5	155.386433265281	5.0537229502177	1.85195057787002	0.0249838928741973	0.0298685108844642
Session 5	193 nm	MicaMg-6	153.815170642117	4.36362844445475	1.8615643061958	0.0290678673392344	0.0476542975018254
Session 5	193 nm	MicaMg-7	156.938825658475	5.76109084895211	1.87494001225718	0.0293065280657589	0.266795751814779
Session 5	193 nm	MicaMg-8	155.077484653354	3.21824955493413	1.84970132603012	0.0187915186127608	0.248319330663262
Session 5	193 nm	MicaMg-9	156.216384149531	4.36985292042653	1.85734782194685	0.0272754762145254	0.226552803138393
Session 5	193 nm	MicaMg-10	157.93167485339	8.46173253153171	1.85553070288582	0.0246516567630609	0.142227182666124
Session 5	193 nm	610-1	2.25272241730378	0.0666023586917434	0.712291355267014	0.00570775135143037	0.245393239162174
Session 5	193 nm	610-2	2.25597962889669	0.0666409805317523	0.711296028920505	0.00479046499909614	0.111360631564893
Session 5	193 nm	610-3	2.26544671436036	0.0736719706332805	0.712763394290423	0.00608360762865222	0.412815476631076
Session 5	193 nm	610-4	2.2413951312309	0.0712763550267961	0.711302732032325	0.00613025578565333	0.377846050068252
Session 5	193 nm	610-5	2.20914578019735	0.0703932089383989	0.70559334840904	0.00670997051832781	0.342652781210969
Session 5	193 nm	610-6	2.26888437364089	0.0799336667545609	0.711019120378425	0.00713930501541257	0.265733833215059
Session 5	193 nm	610-7	2.22665109853508	0.0735777027001235	0.708496997236451	0.00705072189120691	0.454489035041375
Session 5	193 nm	610-8	2.21806368055472	0.0741972825192049	0.708921875730355	0.0082552178881004	0.350845822245711
Session 5	193 nm	610-9	2.24349381941802	0.0516202774748775	0.711148096060418	0.00588941077396239	0.10249078308091
Session 5	193 nm	610-10	2.21147071189754	0.0532975396792373	0.704157051675043	0.00454044070890721	0.0386691105096921
Session 5	193 nm	MicaMg-1	156.663896376461	3.85789452547086	1.85001827963813	0.0250254718098368	0.62304244500884
Session 5	193 nm	MicaMg-2	155.155397475851	4.06632957098228	1.87809058425507	0.0256444810243265	0.448145278982687
Session 5	193 nm	MicaMg-3	152.013794449693	4.46916641245183	1.87348200900144	0.0238823305640643	0.25895132744096
Session 5	193 nm	MicaMg-4	153.426059616863	4.40450169764374	1.85452883750901	0.0303250695984829	0.60503691686629
Session 5	193 nm	MicaMg-5	155.994704487316	5.99253148806822	1.87238815147224	0.0298562733964857	0.743965723078558
Session 5	193 nm	MicaMg-6	158.907027539271	4.53801704018923	1.87170722841458	0.0325004866139832	0.530368199643815
Session 5	193 nm	MicaMg-7	154.835788786229	4.34203600845197	1.83988758405321	0.0264660847388667	0.472564666687443
Session 5	193 nm	MicaMg-8	156.108722724032	4.33236674545375	1.85831398846398	0.0260284601160943	0.621108793444112
Session 5	193 nm	MicaMg-9	154.753500045716	4.71547819907936	1.8169038303803	0.0280582063873845	0.240708364860724
Session 5	193 nm	MicaMg-10	158.141108498568	4.72998361475199	1.86645167836454	0.0277885347541153	0.686907222435135
Session 5	193 nm	610-1	2.29427331389765	0.0508963458244267	0.708646781260754	0.00631855334732614	0.415055851461405
Session 5	193 nm	610-2	2.2809463710203	0.0642457152943522	0.70971396075072	0.00698323214903544	0.484837634822171
Session 5	193 nm	610-3	2.26515228466928	0.0378221572430005	0.70762005591608	0.00412716229900809	0.302506337959304
Session 5	193 nm	610-4	2.28461365865624	0.0382467022470417	0.711032070048079	0.00470918043024774	0.190659653864926
Session 5	193 nm	610-5	2.28650991840332	0.0458074401591414	0.708064422618	0.00557291626721344	0.190778436125465
Session 5	193 nm	610-6	2.30383078779052	0.0338041640362757	0.708265699391341	0.00352216798156617	0.283241713023158
Session 5	193 nm	610-7	2.26773237000891	0.0347198379183606	0.70870197766854	0.0046839994891009	0.046188041439815
Session 5	193 nm	610-8	2.27181311502253	0.0407200365474149	0.711421987367749	0.00473229066716794	0.257884896041743
Session 5	193 nm	610-9	2.28990170990457	0.0436418455849191	0.711048380736147	0.00517938503775042	0.279662488384225
Session 5	193 nm	610-10	2.27367948962942	0.0518702683515369	0.712521250057543	0.00530372558645906	0.28052867735172
Session 5	193 nm	610-11	2.27536642372239	0.0421286672792403	0.707656215096309	0.00488091031393131	0.422257788067921
Session 5	193 nm	610-12	2.24833433428683	0.0397751301743398	0.711695199088735	0.00483300141190921	0.464747638983071
Session 5	193 nm	MicaMg-1	158.886633769139	3.57869860392641	1.88133346962232	0.0313132825240089	0.316453738393797
Session 5	193 nm	MicaMg-2	153.273466649835	4.8160934616937	1.84344020041691	0.0506125293555202	0.611767203352868
Session 5	193 nm	MicaMg-3	155.036150488746	3.76930468479792	1.83124368962025	0.0269204947586878	0.395021355859566
Session 5	193 nm	MicaMg-4	159.250701062957	4.03740904436128	1.88718230537804	0.0308342684656527	0.411870434305831
Session 5	193 nm	MicaMg-5	154.934591111712	4.87508999157352	1.85862538450059	0.0292989107050768	0.378523417447088
Session 5	193 nm	MicaMg-6	150.81242693266	3.70593093315521	1.84621308408917	0.0568325671536649	-0.485658364354636
Session 5	193 nm	MicaMg-7	154.708720003345	3.32158962780503	1.83315203650299	0.0465464327042367	-0.221884777530705
Session 5	193 nm	MicaMg-8	157.124083010773	4.1055553826074	1.8660448313943	0.0328498561894291	-0.119822991674225
Session 5	193 nm	MicaMg-9	147.094257458248	6.09476391217134	1.83600383178069	0.0352919242360081	0.222737565379554
Session 5	193 nm	MicaMg-10	157.838920844348	4.12222088793452	1.8552319989081	0.0272443009600906	-0.0192643094960569
Session 5	193 nm	MicaMg-11	161.285326459668	5.43607768526673	1.8424117756788	0.0361854307807916	0.471779086329245
Session 5	193 nm	MicaMg-12	156.954722208569	4.0693551848363	1.85418060219602	0.047345832254269	0.84542024504337
Session 6	193 nm	610-1	2.18215346830483	0.102187241923966	0.706586139801376	0.00607916236217915	0.479036342857654
Session 6	193 nm	610-2	2.202901527756	0.101183698251397	0.711910908644504	0.00594270915595349	0.227430780444904
Session 6	193 nm	610-3	2.20455740502183	0.121331067900485	0.710878081378053	0.007609587162117	0.489372506743598
Session 6	193 nm	610-4	2.19715999725795	0.109207149408585	0.706010102648508	0.00627231957510418	0.295699844704725
Session 6	193 nm	610-5	2.19791214058581	0.106034140251999	0.713194367565728	0.00570992889402134	0.278999606687916
Session 6	193 nm	610-6	2.17962751554504	0.103967242816547	0.708985968643866	0.00642124905036334	0.385750566926947
Session 6	193 nm	610-7	2.18713170598448	0.10888274055472	0.708200269532484	0.00667332257446082	0.337731313993716
Session 6	193 nm	610-8	2.19491700224971	0.103526990654663	0.708970611092888	0.00682467709359007	0.376861518405596
Session 6	193 nm	610-9	2.20051207960908	0.106388417866246	0.714467171858007	0.00628082820113546	0.422830596276631
Session 6	193 nm	610-10	2.20126065270343	0.102977711093691	0.707786378834586	0.00619381326645217	0.387655496183993
Session 6	193 nm	MicaMg-1	157.587605535182	7.55208629384494	1.84712966781566	0.0338844763097627	0.501766215518735
Session 6	193 nm	MicaMg-2	160.122361593619	7.62025911344785	1.86690229724993	0.0322416517288921	0.407047746212811
Session 6	193 nm	MicaMg-3	158.093246391618	7.51079771469526	1.87585425628536	0.0261618881787211	0.687711257817594
Session 6	193 nm	MicaMg-4	155.261436488558	7.80927474200473	1.84223999189109	0.0304587463567244	0.287506591806674
Session 6	193 nm	MicaMg-5	149.129444306578	7.09365655462428	1.83790397443537	0.0438063792710824	0.388819948047853
Session 6	193 nm	MicaMg-6	155.760488356276	7.32874200005632	1.86726418676156	0.0363964508485825	0.496670309235847
Session 6	193 nm	MicaMg-7	155.345417109488	7.68997812193453	1.88751967152382	0.0299804264865084	0.299162154041303
Session 6	193 nm	MicaMg-8	154.65368800424	7.62782742882659	1.87903347731592	0.0420789072745019	0.46438646520314
Session 6	193 nm	MicaMg-9	158.331013713468	8.25190180595939	1.88844463734647	0.039370046374665	0.363107074562651
Session 6	193 nm	MicaMg-10	151.715298500974	7.41514955510525	1.86588200540675	0.027211168700544	0.635958079454419
Session 6	193 nm	610-1	2.23747110857989	0.139702053776851	0.708516329508056	0.00419010800333247	0.246969184946271
Session 6	193 nm	610-2	2.23495662839567	0.138936296719816	0.707808479797811	0.00399709050649476	0.222077807834295
Session 6	193 nm	610-3	2.25228927234714	0.141145738754904	0.710680603194101	0.00386403336706178	0.00602779530299088
Session 6	193 nm	610-4	2.25253299403697	0.141527563358007	0.70753689236625	0.00406275007169733	0.334889411308029
Session 6	193 nm	610-5	2.2601676649862	0.144660891206998	0.7095383182434	0.00661609234145331	0.499969005782249
Session 6	193 nm	610-6	2.26072318439084	0.14511700676663	0.713823496868666	0.0046849775707673	0.433740432668482
Session 6	193 nm	610-7	2.2440524407258	0.140214439372352	0.709841905122395	0.00489190550325602	0.522121736322353
Session 6	193 nm	610-8	2.2384019104931	0.139824013863391	0.710703728001722	0.00412274963648584	0.0731104812197522
Session 6	193 nm	610-9	2.25408896798186	0.143311068434692	0.709132159770264	0.0044208540977583	0.625869043428097
Session 6	193 nm	610-10	2.24566972900111	0.140828021376085	0.709408087127336	0.00501168845785378	0.300685849581317
Session 6	193 nm	MicaMg-1	160.294821564118	11.4783991369453	1.83928141339865	0.0322690565134783	0.346991756939478
Session 6	193 nm	MicaMg-2	157.17793347687	11.0468266861587	1.87626151117057	0.0401372836802268	-0.0362027228061712
Session 6	193 nm	MicaMg-3	158.72440355425	11.3271126331076	1.84404336460729	0.0277063746721395	0.105199375471651
Session 6	193 nm	MicaMg-4	148.061085808851	9.88157895673574	1.84429973703348	0.0359497330625925	0.603815474900043
Session 6	193 nm	MicaMg-5	163.82019851587	11.3527179133678	1.84429641396684	0.0272741089341755	0.409660851749827
Session 6	193 nm	MicaMg-6	154.44397641141	10.0649452276168	1.86296971455266	0.0325127451584762	0.834480933147901
Session 6	193 nm	MicaMg-7	155.661645487185	10.4401373784932	1.86105284464068	0.0348680313601347	0.342703025393023
Session 6	193 nm	MicaMg-8	151.223191412122	9.79526844999846	1.85069248561132	0.0280516626781695	0.272058771540685
Session 6	193 nm	MicaMg-9	153.184296956586	9.63759967852661	1.85465977409975	0.0259714569947873	0.624132748070083
Session 6	193 nm	MicaMg-10	153.408446812738	10.4371377834465	1.83297771785612	0.0396193000353189	0.434980686681999
Session 6	193 nm	610-1	2.2706157812227	0.0519870706902528	0.710312909879691	0.00564869906715051	0.23915962178221
Session 6	193 nm	610-2	2.26314353826647	0.0506529830708338	0.711706210604553	0.00638918436098676	0.404139942894415
Session 6	193 nm	610-3	2.26073340729029	0.0611798801719576	0.707730898231	0.00600671127126663	0.180971338884481
Session 6	193 nm	610-4	2.24569915208606	0.0534381668224658	0.707890865684042	0.0068673199616413	0.394885345453559
Session 6	193 nm	610-5	2.26122099744733	0.0509406240315389	0.7135915956338	0.00648439938414187	0.0190728820605491
Session 6	193 nm	610-6	2.27491493886947	0.0481263211164958	0.709770317238464	0.00531183578806489	0.193540488970735
Session 6	193 nm	610-7	2.26753036089961	0.0545413664786567	0.708018536678881	0.00669270542865523	0.309741366333202
Session 6	193 nm	610-8	2.28375151352882	0.0543618816767397	0.714857037225366	0.00612651568131241	0.43010688729612
Session 6	193 nm	610-9	2.26747303141321	0.0524040911528602	0.704921787094258	0.00664256103958801	0.140384490321217
Session 6	193 nm	610-10	2.27715524592796	0.0534004554066046	0.712815972046947	0.00671309331444594	0.386177875351854
Session 6	193 nm	610-11	2.27151687410794	0.0536213434479854	0.707795132610651	0.00679377739134289	0.234066663620447
Session 6	193 nm	610-12	2.24741183639498	0.0524724520789657	0.711110087163075	0.00607922072700269	0.249498432114343
Session 6	193 nm	610-13	2.24894965985801	0.0492826722727327	0.707682960478353	0.00603936311062411	0.308206098642563
Session 6	193 nm	610-14	2.25749912280877	0.0472838488025696	0.70758168943092	0.00648138260908851	0.56158870022616
Session 6	193 nm	MicaMg-1	154.61345833514	5.56044883267591	1.86838009929773	0.0466263096396716	0.241803840015699
Session 6	193 nm	MicaMg-2	153.578512002402	4.32897145950864	1.84659544163464	0.0390852825973559	0.715184910138888
Session 6	193 nm	MicaMg-3	160.665781062182	5.61998555807038	1.87011674195975	0.0417732442972987	0.618828171988759
Session 6	193 nm	MicaMg-4	153.555020489812	4.02416644370661	1.86488667708126	0.0312000318874021	0.179176910702204
Session 6	193 nm	MicaMg-5	153.425746801749	4.2594164501324	1.82183249414398	0.025367604199768	0.629984703076573
Session 6	193 nm	MicaMg-6	151.335884739619	4.61733979272939	1.86841731212873	0.0493675598976701	0.350851397890136
Session 6	193 nm	MicaMg-7	155.523514583317	4.15550474345163	1.86993222662358	0.0290314810266911	0.407262704429155
Session 6	193 nm	MicaMg-8	156.361472918092	4.40308151033524	1.85548433407972	0.0278477065746237	0.633402938255779
Session 6	193 nm	MicaMg-9	154.881689975823	4.94658896608138	1.86371921794794	0.030477856827932	0.556753325760155
Session 6	193 nm	MicaMg-10	155.755701642107	4.18131196582447	1.86021707435964	0.0390973251473728	0.300200429689533
Session 6	193 nm	MicaMg-11	155.826712349801	3.66365109386543	1.84532510519094	0.027209858043978	0.675969007268445
Session 6	193 nm	MicaMg-12	156.002669937164	4.07725059600672	1.86675064754573	0.0456314727421378	0.221774743528484
Session 6	193 nm	MicaMg-13	156.395684117753	4.63233309416882	1.85599879347491	0.0480629434270339	0.75363578101901
Session 6	193 nm	MicaMg-14	160.47815104504	4.49101098989034	1.88270574653693	0.0396033276203563	0.345314231715235
Session 6	193 nm	610-1	2.2519678294182	0.021364789560336	0.70844347591709	0.0042511380506838	0.257378878738205
Session 6	193 nm	610-2	2.24690745043434	0.0188898123027279	0.710002554977468	0.00438038753420877	0.318836041638425
Session 6	193 nm	610-3	2.23347918498399	0.0210154236973883	0.71184699535075	0.0049638230064895	0.573038065907491
Session 6	193 nm	610-4	2.2161281953339	0.0201883843784409	0.708173502841916	0.00414771188354984	0.14809792695506
Session 6	193 nm	610-5	2.23460283881936	0.0341861948707137	0.707723641271246	0.00379975050949924	0.354296105661309
Session 6	193 nm	610-6	2.22874259504961	0.0261428082523413	0.709955881605285	0.00408629472488729	0.436707223747233
Session 6	193 nm	610-7	2.21810217167297	0.0351441538468623	0.708838126028632	0.00410260904841011	0.486460961888771
Session 6	193 nm	610-8	2.21321794102572	0.0305085641460793	0.706282542385838	0.00544123728713108	0.201322008025471
Session 6	193 nm	610-9	2.21681084422905	0.0286731076036594	0.709526592118317	0.00471676355485362	0.403210110976075
Session 6	193 nm	610-10	2.23483524931455	0.0282882378353491	0.708702553235547	0.00408577659359745	0.281328138894317
Session 6	193 nm	610-11	2.21204028305434	0.0208993661239551	0.714109445676059	0.00390296589273564	0.233298464803898
Session 6	193 nm	610-12	2.19124124454419	0.0226195363032288	0.709011907441021	0.00633455047846859	0.551093661971088
Session 6	193 nm	610-13	2.21363779214132	0.0230604837689379	0.711565688101466	0.00312090037036713	0.28099275914568
Session 6	193 nm	610-14	2.19919534025259	0.0184118689868792	0.708990994882337	0.00444485446591126	0.435598958876329
Session 6	193 nm	610-15	2.19053616024344	0.0257373025395449	0.706731399982874	0.00393123359441045	0.130968300881002
Session 6	193 nm	610-16	2.21758563861754	0.0260329128817227	0.709481654575637	0.00496630737741256	0.172915020897865
Session 6	193 nm	610-17	2.20499271754095	0.0286404052802055	0.71135972269427	0.00455122096402485	0.607834430916429
Session 6	193 nm	610-18	2.19815706034721	0.021365475826659	0.713835320914244	0.00536379604920704	0.292275083429238
Session 6	193 nm	MicaMg-1	156.972497168588	3.8478803570803	1.83599077969281	0.0401910024186066	0.177465772856565
Session 6	193 nm	MicaMg-2	161.045531675362	2.77498027860209	1.92195912200668	0.0325021388654363	0.412638664086164
Session 6	193 nm	MicaMg-3	155.572103025426	2.37995492849196	1.86177929836679	0.0262390235433751	0.466132846692669
Session 6	193 nm	MicaMg-4	154.44207331523	6.06686130661384	1.81403609627003	0.0689856182916313	0.862822106833203
Session 6	193 nm	MicaMg-5	156.713174591509	2.34063935153724	1.84987412586062	0.0261387325260475	0.451685221328258
Session 6	193 nm	MicaMg-6	155.620410930445	2.95654658648429	1.87326466323075	0.0287040425807284	0.76518940143575
Session 6	193 nm	MicaMg-7	159.591928738475	3.88151833879856	1.86101731717257	0.0311401863059724	0.787845067845573
Session 6	193 nm	MicaMg-8	154.195274702816	2.90679526857271	1.89475891875646	0.0432914118402538	0.77769835849702
Session 6	193 nm	MicaMg-9	150.20475739834	2.25506492438048	1.86690888981321	0.0357295582378646	0.425202760373711
Session 6	193 nm	MicaMg-10	153.208793545255	3.15303844669938	1.84360645132192	0.028605839236741	0.306868924694095
Session 6	193 nm	MicaMg-11	156.904002640848	2.67985163981633	1.86797269596294	0.0298052351084482	0.548550932216969
Session 6	193 nm	MicaMg-12	157.227130587924	4.79325949159831	1.81606623838053	0.052189977711236	0.454475355566911
Session 6	193 nm	MicaMg-13	154.167006013768	3.73617496115006	1.84130332337318	0.0282225962600522	0.404252826565015
Session 6	193 nm	MicaMg-14	156.923769149515	3.28446956785242	1.8714001686698	0.0346007485593467	0.526685059749222
Session 6	193 nm	MicaMg-15	152.716612934811	2.73207655183629	1.85624179338727	0.0294509511242879	0.532355537957822
Session 6	193 nm	MicaMg-16	152.792813230139	2.57628768276945	1.85560273061065	0.0251625217045297	0.48574452877533
Session 6	193 nm	MicaMg-17	156.355439281734	2.24949990692099	1.8565834323969	0.0339260529314566	0.293360382279296
Session 6	193 nm	MicaMg-18	156.146681069814	2.5631446896764	1.89005322855874	0.0344105495825617	0.66787782441964
Session 7	193 nm	610-1	2.22361567891682	0.102027753122851	0.712074132245269	0.00677072765483794	0.0100483394930103
Session 7	193 nm	610-2	2.2555764007771	0.105292468614361	0.710792810069792	0.00750494369784153	0.256486685086106
Session 7	193 nm	610-3	2.25790677878201	0.104333072336617	0.708838205837854	0.00648469266966053	0.230182809671215
Session 7	193 nm	610-4	2.26205496603136	0.105433240060653	0.710141253879161	0.0071901182580202	0.699844088867842
Session 7	193 nm	610-5	2.23045045789942	0.107247059748027	0.710967798722213	0.00957819541409383	0.272738197808468
Session 7	193 nm	610-6	2.23537724121279	0.108983816572562	0.71232739420798	0.00848137549264624	0.130536399938379
Session 7	193 nm	610-7	2.19798007320715	0.109577225962272	0.710542841318768	0.0092346648999801	0.495571873202353
Session 7	193 nm	610-8	2.21950825271066	0.113770555505991	0.705312536198944	0.00888986877764599	0.334012438921771
Session 7	193 nm	610-9	2.24141730773942	0.114396937953484	0.706326486962724	0.00929891888516981	0.299577863978952
Session 7	193 nm	610-10	2.22887431843655	0.11131271341903	0.709188984787078	0.0113156730080284	0.23153005069082
Session 7	193 nm	610-11	2.21843841439501	0.119692017675049	0.707563866568666	0.0101074462203186	0.133062981591031
Session 7	193 nm	610-12	2.26387612076144	0.105088301445253	0.709140014482724	0.00787984564261337	0.28866662488734
Session 7	193 nm	610-13	2.23419958503551	0.104480228010188	0.713845512589566	0.00708059941061167	0.453618674437237
Session 7	193 nm	610-14	2.24652148559799	0.112897647347534	0.704065788995795	0.00830032647033493	0.314561036709485
Session 7	193 nm	610-15	2.2501713590563	0.116789223056494	0.711365805758242	0.00990902967200949	0.273693608833096
Session 7	193 nm	610-16	2.24253680745704	0.11966223099154	0.709288824193309	0.00864203235964664	0.0239434099046156
Session 7	193 nm	610-17	2.22043609471742	0.110781348460709	0.705665890992815	0.00798621612912559	0.20020453639756
Session 7	193 nm	610-18	2.2216840844297	0.108608737480023	0.703908163187021	0.00718590955884136	0.0929993248704415
Session 7	193 nm	610-19	2.23811537058548	0.107404291493992	0.708281702664696	0.00869023892619883	0.554154146505916
Session 7	193 nm	610-20	2.23651606917122	0.107496877489277	0.705561762590521	0.00606088512570816	0.450103261911754
Session 7	193 nm	610-21	2.21761744575977	0.113977135934492	0.718067794622538	0.00834048744165869	0.164905538651275
Session 7	193 nm	610-22	2.23742559125248	0.111289132739712	0.708675028802617	0.00762646283774938	0.134994433071661
Session 7	193 nm	610-23	2.22533649573867	0.11952963026102	0.711854377068922	0.0112026840191296	0.116158929167962
Session 7	193 nm	610-24	2.20765110281722	0.110592094901727	0.719645595742522	0.00918227788686989	0.0671083444031962
Session 7	193 nm	610-25	2.22878537204552	0.129170070140971	0.704411941389857	0.00904780842819474	0.318980869717985
Session 7	193 nm	610-26	2.19437690306613	0.112610678593482	0.714319486120401	0.00851238514535858	0.0954778693421589
Session 7	193 nm	MicaMg-1	159.27637982033	9.7138460067375	1.84844161537646	0.0472862586557988	0.506688301955654
Session 7	193 nm	MicaMg-2	155.791463039078	9.14054986502308	1.86105975093606	0.0445365996088557	0.655209179168359
Session 7	193 nm	MicaMg-3	160.06131609791	9.56454884843946	1.87840115213643	0.0494042754053198	0.566351144142012
Session 7	193 nm	MicaMg-4	151.982570810809	8.08394033562543	1.83570783630652	0.0415962610380388	0.732351471164381
Session 7	193 nm	MicaMg-5	163.008810389728	7.75450188069442	1.87430780052455	0.0414474194870698	0.564059477562381
Session 7	193 nm	MicaMg-6	163.196968428786	8.18328433123462	1.89210531471225	0.0357083861079049	0.507527804880182
Session 7	193 nm	MicaMg-7	160.910858769779	7.68815062039473	1.91933615161025	0.0313783554892891	0.377883333392349
Session 7	193 nm	MicaMg-8	158.555033729973	7.88062834904502	1.85608089492382	0.029515045386968	0.139897189820747
Session 7	193 nm	MicaMg-9	153.692194880949	9.05664642870878	1.86369814471278	0.0414031625846615	0.398789525084289
Session 7	193 nm	MicaMg-10	150.62981674449	7.41092193412696	1.87020558697102	0.0349913094681053	0.413242120265814
Session 7	193 nm	MicaMg-11	152.002719033199	7.65823656059307	1.84786251126246	0.0314005388702245	0.377073843341204
Session 7	193 nm	MicaMg-12	151.425741079467	10.1118464559213	1.81919164347805	0.0452977434915584	0.485791414990039
Session 7	193 nm	MicaMg-13	159.061790589103	8.33158698215782	1.84951214697018	0.0437479705858734	0.139983451865993
Session 7	193 nm	MicaMg-14	155.872138809876	9.14168421761775	1.8778076839839	0.0367772014363203	0.441925019017619
Session 7	193 nm	MicaMg-15	152.23560235238	8.23011944736915	1.83882644810717	0.0335899017737617	0.401805263117952
Session 7	193 nm	MicaMg-16	155.815951908972	8.02398740609183	1.85714911264761	0.0443084743156922	0.38664045456037
Session 7	193 nm	MicaMg-17	154.11378645679	7.23057175438064	1.86004910675784	0.0337882229385234	0.49963761666638
Session 7	193 nm	MicaMg-18	152.243356639084	7.70540791700242	1.86538590193792	0.0332636326272316	0.508933429074285
Session 7	193 nm	MicaMg-19	150.72779340651	7.01588191158664	1.85859365099034	0.0390870319025269	0.649203339364905
Session 7	193 nm	MicaMg-20	156.411893314876	7.67574969415738	1.89115836147707	0.0334410037115188	0.524220921666362
Session 7	193 nm	MicaMg-21	152.95933631896	7.23231676713955	1.85701246058741	0.0426319874879489	0.491177926011663
Session 7	193 nm	MicaMg-22	153.64762987883	7.05246900801912	1.86815523485887	0.026802288388253	0.361021037780122
Session 7	193 nm	MicaMg-23	159.34842053634	8.7261805558739	1.8757665241664	0.0475479168211059	0.4029984062373
Session 7	193 nm	MicaMg-24	158.419068830966	8.55617660298162	1.83796996313922	0.0403218128736543	0.402859425553727
Session 7	193 nm	MicaMg-25	157.608901034676	7.66638734762972	1.88291366739106	0.0386106500421751	0.693951471022878
Session 7	193 nm	MicaMg-26	146.600457098141	7.48311880754846	1.79845131372836	0.0490525570390017	0.315422384718273
Session 8	193 nm	610-1	2.21145962382852	0.0862399390917215	0.70870566642712	0.0100559951150624	0.162674532922067
Session 8	193 nm	610-2	2.28814413955897	0.0909887718009597	0.714351051168099	0.00746470536353716	0.019252005562755
Session 8	193 nm	610-3	2.21750609796428	0.0646177180536084	0.708362406286572	0.00754116196673469	0.560614781085795
Session 8	193 nm	610-4	2.21240466082759	0.0686295693465432	0.712046427436496	0.0072944665638363	0.379622294238038
Session 8	193 nm	610-5	2.19916565308302	0.0770117361478941	0.706542979217928	0.00773871125715876	0.3108972006439
Session 8	193 nm	610-6	2.23475751676342	0.0705940546781517	0.712515932726007	0.00749644783307554	0.174396634256695
Session 8	193 nm	610-9	2.22683700695875	0.0705192830489637	0.714309917775414	0.00806394699764655	-0.0427631919209874
Session 8	193 nm	610-10	2.19580018172772	0.0694805994971445	0.708847209740955	0.00774867282093322	0.246408487072306
Session 8	193 nm	610-11	2.21540699654264	0.074461965841157	0.709578401568675	0.00935473019128756	0.359908548219479
Session 8	193 nm	610-12	2.21929878656304	0.0680169361957103	0.712027491735626	0.00760308215176623	0.245984571951717
Session 8	193 nm	610-13	2.219875791837	0.0668722155004462	0.710776066982831	0.00714223277147272	0.490749262747444
Session 8	193 nm	610-14	2.24357980384789	0.0736160935062795	0.717717217669446	0.00794795617472949	0.296025430493976
Session 8	193 nm	610-15	2.23750397520754	0.0709620072804172	0.710971265454544	0.00728937985708908	0.163367257139928
Session 8	193 nm	610-16	2.22404220576513	0.0641546833184876	0.711081546095478	0.00793181265438996	-0.0610756280936429
Session 8	193 nm	610-17	2.18581041700281	0.0623023889606755	0.706726047655279	0.00752020060484176	0.379471344725814
Session 8	193 nm	610-18	2.20493635401337	0.0645149311614197	0.709011973951182	0.00841488742418347	0.0944564422517121
Session 8	193 nm	610-19	2.1954155367048	0.0768208688814192	0.701643692303235	0.00727049861757876	0.106596094760294
Session 8	193 nm	610-20	2.18484899875109	0.0706520946444393	0.709224824512364	0.00754672912548225	0.326547158000101
Session 8	193 nm	610-21	2.2041524035546	0.0753866268549477	0.706996790886833	0.00827586902549972	0.254088256705112
Session 8	193 nm	610-22	2.18649217592871	0.0672580993907184	0.703361953119173	0.0091918831958388	0.251297317622685
Session 8	193 nm	610-23	2.20720865951231	0.0670969195144726	0.709917121461418	0.00785585049883891	0.0383351135360429
Session 8	193 nm	610-24	2.18514104281849	0.0924538323304328	0.708662015825327	0.0114969244949092	0.405142016482893
Session 8	193 nm	MicaMg-1	154.545803484688	5.3100188602845	1.86474449269724	0.0256858314684277	0.450024533781016
Session 8	193 nm	MicaMg-2	154.662244601062	5.27916708702162	1.8793568033461	0.0356432314933285	0.660207347008624
Session 8	193 nm	MicaMg-3	156.783852482396	5.60136023314568	1.8675260710694	0.0359627185712824	0.612475308858228
Session 8	193 nm	MicaMg-4	155.689285224887	7.15206830579047	1.85012384125141	0.0461860312981045	0.688349132129706
Session 8	193 nm	MicaMg-5	153.724558309924	6.16557505528877	1.84928577358884	0.0379745704803154	0.754905076863942
Session 8	193 nm	MicaMg-6	160.773978416778	5.85689843379934	1.87633379746139	0.0305666745302784	0.1898569193012
Session 8	193 nm	MicaMg-9	160.253933375472	5.89865830005845	1.89190028152172	0.0401948179362092	0.598346939861424
Session 8	193 nm	MicaMg-10	153.481369350569	8.67230424009303	1.87385682460877	0.0378511853355177	0.274036962062656
Session 8	193 nm	MicaMg-11	155.437218089317	5.49240179186703	1.86467463317111	0.0278990970549482	0.245191868542927
Session 8	193 nm	MicaMg-12	157.524891662634	5.32221496248851	1.87931688988052	0.0385705248219652	0.766542942459366
Session 8	193 nm	MicaMg-13	154.877953325977	4.78627221751709	1.87025262833799	0.0372490057886074	0.430137036196431
Session 8	193 nm	MicaMg-14	155.62991941866	5.43957626438264	1.88328992045601	0.0315469599839748	0.546664634286368
Session 8	193 nm	MicaMg-15	161.766880459147	7.39232577495912	1.83738386775366	0.0461304354768053	0.330217198752256
Session 8	193 nm	MicaMg-16	150.157593728013	5.41360488886489	1.86093529333184	0.028181564970553	0.557227798223598
Session 8	193 nm	MicaMg-17	156.499214389478	5.52555193113204	1.83576933171776	0.0340088408669317	0.481576650035371
Session 8	193 nm	MicaMg-18	153.813123292292	5.01860368759044	1.856251593107	0.0312669667991242	0.410995879567523
Session 8	193 nm	MicaMg-19	156.630173946658	5.25856966618728	1.91144798168935	0.0378760730861228	0.438369089162273
Session 8	193 nm	MicaMg-20	154.985004811482	4.87719714653769	1.89672758107857	0.038913186006531	0.688685888304191
Session 8	193 nm	MicaMg-21	156.065477546321	4.93497149925396	1.89805150369341	0.0327292422040363	0.489091503320744
Session 8	193 nm	MicaMg-22	151.871557907217	5.48619995015191	1.89107645817351	0.0385408406660527	0.63264493457714
Session 8	193 nm	MicaMg-23	153.72241468033	4.71341857423221	1.87336338834226	0.0391255449242352	0.356083059361594
Session 8	193 nm	MicaMg-24	154.3035514967	5.10922102465241	1.88732278448398	0.0346782474479847	0.478530987919795
