# Supplementary material for: Dating circulations of hydrothermal fluids in the crystalline basements of unconformity-related metallic deposits using in situ Rb/Sr geochronology: proof of concept
Source: Copernicus journal article supplement (doi:10.5194/egusphere-2025-6469), 2026-01-20

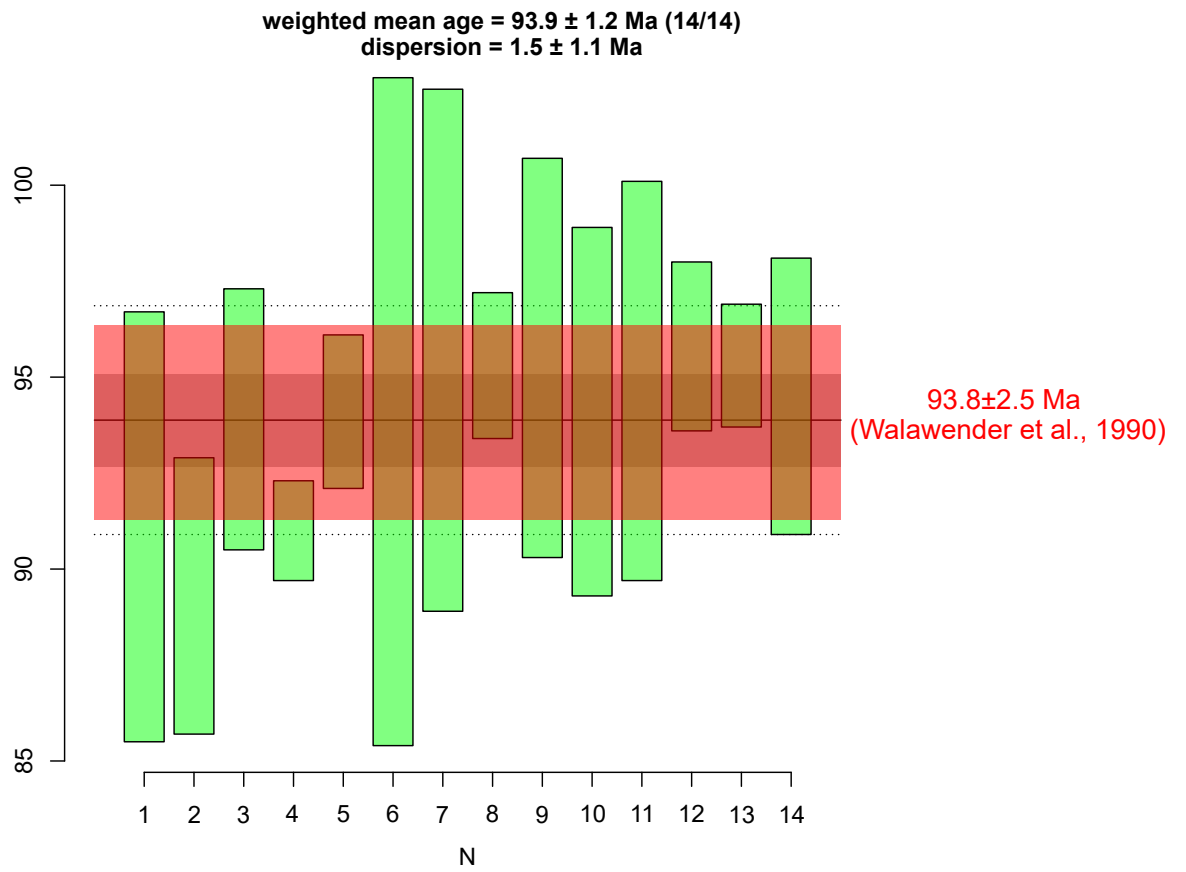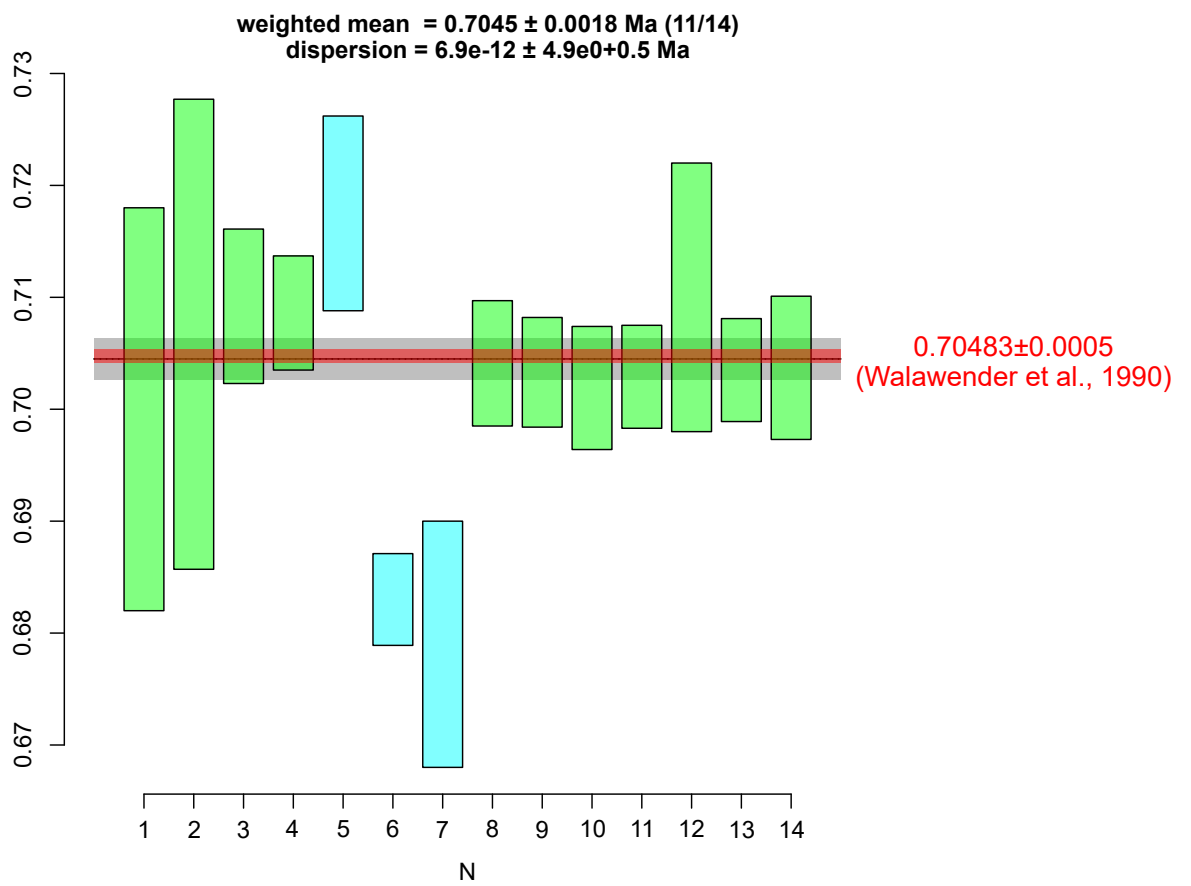

Supplement: Supplementary file [file egusphere-2025-6469-AC1-supplement.pdf]
